# Supplementary material
Source: publisher figshare collection journal article supplement (https://diabetesjournals.figshare.com/ndownloader/files/31765241)
Supplement: Supplementary file 1 [file 31765241]

## Sheet: Table_S8
Table S8. Differential accessibility analysis between Progressors and Non-progressors at the ‘Earliest pre-clinical’ time point
peakID	Chr	Start	End	Geneid	distanceToTSS	SYMBOL	simple_annot	logFC	logCPM	LR	PValue	FDR
peak_54437	chr4	145178870	145181295	chr4:145178870_145181295	-116966	GYPA	Distal Intergenic	1.40282	7.22727	67.8534	1.76112e-16	5.50563e-12
peak_40766	chr2	169732825	169734641	chr2:169732825_169734641	12303	SPC25	Exon	3.55049	2.13152	63.3229	1.75457e-15	2.74257e-11
peak_76453	chrX	154308083	154308874	chrX:154308083_154308874	8388	BRCC3	Intron	4.1788	4.57201	56.4113	5.8791e-14	6.12641e-10
peak_62169	chr6	135837405	135837657	chr6:135837405_135837657	18466	LINC00271	Intron	1.52853	6.27813	46.6848	8.33732e-12	6.51603e-08
peak_52266	chr4	1315928	1316492	chr4:1315928_1316492	-24612	UVSSA	Exon	4.88574	2.48158	37.0874	1.12953e-09	7.06225e-06
peak_68221	chr8	10548032	10548439	chr8:10548032_10548439	17885	C8orf74	Intron	2.46475	3.20429	32.73	1.05889e-08	5.51716e-05
peak_32130	chr18	51153423	51154656	chr18:51153423_51154656	594126	SNORA37	Distal Intergenic	2.22283	2.39363	32.3957	1.25763e-08	5.61659e-05
peak_48775	chr3	39267574	39268493	chr3:39267574_39268493	-33489	XIRP1	Distal Intergenic	-0.895608	5.58892	31.5866	1.9074e-08	7.45364e-05
peak_29403	chr17	48026534	48026834	chr17:48026534_48026834	-19728	DLX4	Distal Intergenic	3.61783	2.38832	30.8676	2.76245e-08	9.59551e-05
peak_32071	chr18	48913157	48913604	chr18:48913157_48913604	-4808	LINC01630	Distal Intergenic	2.06456	3.3903	30.3771	3.55701e-08	0.000111199
peak_58494	chr5	154189535	154191264	chr5:154189535_154191264	38949	FAXDC2	Exon	5.33799	2.3442	28.3831	9.95325e-08	0.000282871
peak_70317	chr8	132985282	132985969	chr8:132985282_132985969	68926	EFR3A	Intron	-2.6779	3.33048	26.3451	2.85546e-07	0.000743895
peak_56019	chr5	48436580	48437477	chr5:48436580_48437477	1299757	EMB	Distal Intergenic	2.05314	2.54741	25.5846	4.23401e-07	0.00101818
peak_66491	chr7	100454345	100454846	chr7:100454345_100454846	4004	SLC12A9	5' UTR	2.15381	2.25746	24.7626	6.48441e-07	0.00137596
peak_51633	chr3	183188901	183189285	chr3:183188901_183189285	23505	LINC00888	Distal Intergenic	3.28513	2.66237	24.7279	6.60205e-07	0.00137596
peak_44194	chr20	44080501	44081201	chr20:44080501_44081201	-17193	WFDC2	Distal Intergenic	2.05416	3.13131	24.3734	7.93589e-07	0.00153249
peak_8390	chr10	30534312	30534954	chr10:30534312_30534954	128423	MTPAP	Distal Intergenic	2.42695	3.04701	24.2792	8.33355e-07	0.00153249
peak_68923	chr8	42712469	42713119	chr8:42712469_42713119	-13995	THAP1	Intron	1.93093	2.7393	23.9168	1.00589e-06	0.00174701
peak_40382	chr2	148659006	148659650	chr2:148659006_148659650	56920	ACVR2A	Intron	1.91982	2.37375	23.7263	1.11057e-06	0.00175858
peak_53722	chr4	88940239	88941121	chr4:88940239_88941121	11440	PKD2	Exon	1.67817	2.8055	23.7013	1.12506e-06	0.00175858
peak_69075	chr8	56113106	56113660	chr8:56113106_56113660	98089	XKR4	Intron	1.60591	3.50447	23.4307	1.29497e-06	0.00192778
peak_62131	chr6	134873563	134874447	chr6:134873563_134874447	114709	LINC01010	Intron	2.21428	3.06569	22.5957	1.99927e-06	0.00269875
peak_12405	chr11	62678536	62679606	chr11:62678536_62679606	9406	CHRM1	5' UTR	1.98936	2.9453	22.5272	2.07184e-06	0.00269875
peak_21122	chr14	68685322	68686269	chr14:68685322_68686269	398826	RAD51B	Intron	2.59489	2.731	22.6766	1.9169e-06	0.00269875
peak_29899	chr17	63694269	63694964	chr17:63694269_63694964	-57086	AXIN2	Intron	1.98298	3.25715	22.0977	2.59122e-06	0.00324027
peak_61010	chr6	59593704	59594085	chr6:59593704_59594085	-1305980	GUSBP4	Distal Intergenic	1.62589	3.82811	21.7802	3.05741e-06	0.0034136
peak_67221	chr7	135169226	135171315	chr7:135169226_135171315	23560	CNOT4	Intron	1.8138	2.50969	21.8499	2.94836e-06	0.0034136
peak_13355	chr11	96024774	96025126	chr11:96024774_96025126	-49476	MIR1260B	Intron	1.56761	2.90307	21.7812	3.0558e-06	0.0034136
peak_37591	chr2	30257329	30258565	chr2:30257329_30258565	-111185	YPEL5	Distal Intergenic	2.34219	2.53702	21.5944	3.36836e-06	0.00353324
peak_38996	chr2	92471811	92472082	chr2:92471811_92472082	342652	ACTR3BP2	Distal Intergenic	2.11304	2.13802	21.5189	3.50363e-06	0.00353324
peak_75597	chrX	73852677	73852894	chrX:73852677_73852894	-18216	RLIM	Distal Intergenic	-0.606477	5.89192	21.5726	3.4069e-06	0.00353324
peak_53569	chr4	81789759	81790348	chr4:81789759_81790348	-161771	BMP3	Intron	2.02831	2.61936	21.3889	3.74943e-06	0.00366296
peak_68037	chr8	687505	688854	chr8:687505_688854	0	NA	Promoter	-0.768233	5.33555	21.2264	4.08113e-06	0.00375248
peak_37242	chr2	12589330	12589577	chr2:12589330_12589577	-267421	TRIB2	Intron	1.95158	3.13458	21.2549	4.02071e-06	0.00375248
peak_20139	chr14	21253215	21253640	chr14:21253215_21253640	4005	RNASE6	Distal Intergenic	1.9093	4.51221	21.1309	4.28945e-06	0.0037548
peak_65301	chr7	47647088	47647833	chr7:47647088_47647833	-25346	TNS3	Distal Intergenic	1.89385	3.18001	21.1156	4.32387e-06	0.0037548
peak_62392	chr6	142858935	142859211	chr6:142858935_142859211	99815	LOC153910	Intron	2.84085	2.30984	21.0251	4.53315e-06	0.00383014
peak_38415	chr2	69650212	69650973	chr2:69650212_69650973	13787	NFU1	Exon	1.94584	3.18289	20.7751	5.16515e-06	0.00397915
peak_58962	chr5	178116412	178116877	chr5:178116412_178116877	40826	ZNF354A	Distal Intergenic	1.48498	4.966	20.816	5.05599e-06	0.00397915
peak_62101	chr6	134123550	134124208	chr6:134123550_134124208	-18077	LINC01312	Intron	2.24868	2.36398	20.7553	5.21864e-06	0.00397915
peak_72075	chr9	45062634	45063286	chr9:45062634_45063286	72398	FAM27C	Distal Intergenic	1.41529	5.75544	20.8295	5.0205e-06	0.00397915
peak_62308	chr6	139160039	139160560	chr6:139160039_139160560	42791	ECT2L	Intron	4.06909	2.20113	20.6884	5.40422e-06	0.00402254
peak_17842	chr12	121917994	121919001	chr12:121917994_121919001	80108	RNF34	Intron	1.9401	2.82167	20.5493	5.81144e-06	0.00422505
peak_70306	chr8	132547915	132548128	chr8:132547915_132548128	-368228	EFR3A	Distal Intergenic	1.87935	2.83065	20.4914	5.99004e-06	0.00425593
peak_4255	chr1	124308776	124309878	chr1:124308776_124309878	3047866	EMBP1	Distal Intergenic	1.85977	3.06526	20.3666	6.39364e-06	0.00443463
peak_61311	chr6	89926947	89927262	chr6:89926947_89927262	13745	GABRR1	5' UTR	0.717295	7.59457	20.3276	6.52527e-06	0.00443463
peak_75784	chrX	102863706	102864068	chrX:102863706_102864068	872	TCEAL3	5' UTR	6.02636	3.24791	20.1764	7.06183e-06	0.00469717
peak_20145	chr14	21268870	21270460	chr14:21268870_21270460	576	RNASE1	5' UTR	2.41378	2.98243	19.822	8.49965e-06	0.00537332
peak_9864	chr10	89327628	89328453	chr10:89327628_89328453	63405	MINPP1	Distal Intergenic	1.50071	3.22869	19.7631	8.76589e-06	0.00537332
peak_64650	chr7	17463690	17463979	chr7:17463690_17463979	125414	AHR	Distal Intergenic	4.13698	2.21447	19.8773	8.25771e-06	0.00537332
peak_72762	chr9	93132852	93135141	chr9:93132852_93135141	209887	LINC01501	Distal Intergenic	2.06053	2.84506	19.7887	8.64915e-06	0.00537332
peak_71987	chr9	44666749	44667250	chr9:44666749_44667250	-322986	FAM27C	Distal Intergenic	2.14448	3.54984	19.594	9.5771e-06	0.00575768
peak_61083	chr6	67346448	67346652	chr6:67346448_67346652	848676	SLC25A51P1	Distal Intergenic	5.45261	2.49993	19.3689	1.07749e-05	0.00615252
peak_61371	chr6	90273577	90275263	chr6:90273577_90275263	73211	LYRM2	Intron	2.08209	3.06199	19.3601	1.08243e-05	0.00615252
peak_42546	chr2	238238744	238241155	chr2:238238744_238241155	81695	COL6A3	Intron	1.67498	4.5667	19.4179	1.05016e-05	0.00615252
peak_62003	chr6	130138299	130139240	chr6:130138299_130139240	43176	TMEM244	Intron	-0.614755	5.70773	19.2469	1.14855e-05	0.0064118
peak_42769	chr20	1118024	1119427	chr20:1118024_1119427	24118	PSMF1	Intron	2.52969	2.24225	19.2089	1.17167e-05	0.00642609
peak_70299	chr8	130518355	130518634	chr8:130518355_130518634	-264869	LINC00977	Distal Intergenic	1.90666	3.65465	19.1181	1.22872e-05	0.00662278
peak_13347	chr11	95734086	95734293	chr11:95734086_95734293	-76715	MTMR2	Intron	1.85909	4.77137	19.0386	1.28102e-05	0.00667452
peak_51915	chr3	194047255	194047680	chr3:194047255_194047680	-16662	LINC00887	Distal Intergenic	2.48003	3.0877	19.0705	1.25979e-05	0.00667452
peak_48163	chr3	13548751	13550186	chr3:13548751_13550186	-23638	FBLN2	Distal Intergenic	1.67946	2.30093	18.9456	1.345e-05	0.006893
peak_22755	chr15	25810486	25813037	chr15:25810486_25813037	-126311	UBE3A	Distal Intergenic	1.85182	4.98124	18.8139	1.44109e-05	0.00726636
peak_38164	chr2	60735408	60736215	chr2:60735408_60736215	44418	BCL11A	5' UTR	2.06887	3.52738	18.7377	1.49985e-05	0.00732628
peak_74470	chrX	249060	251260	chrX:249060_251260	2282128	LINC00102	Distal Intergenic	1.90672	4.38152	18.7581	1.48392e-05	0.00732628
peak_70160	chr8	125911693	125913438	chr8:125911693_125913438	-38446	LINC00964	Distal Intergenic	1.6942	3.06292	18.4406	1.75283e-05	0.00817865
peak_42163	chr2	225030110	225030626	chr2:225030110_225030626	-126074	SERPINE2	Distal Intergenic	1.92601	2.74406	18.4909	1.70721e-05	0.00817865
peak_50635	chr3	125155000	125155237	chr3:125155000_125155237	-60802	ZNF148	Distal Intergenic	2.18221	2.89598	18.4435	1.75016e-05	0.00817865
peak_31949	chr18	36809566	36810172	chr18:36809566_36810172	-446513	MIR5583-1	Intron	1.98221	2.17209	18.3927	1.7975e-05	0.00826374
peak_71929	chr9	44450630	44451468	chr9:44450630_44451468	-538768	FAM27C	Distal Intergenic	1.08606	5.10459	18.3313	1.85635e-05	0.00841059
peak_34809	chr19	26655250	26656487	chr19:26655250_26656487	1628361	LINC00662	Distal Intergenic	2.26652	2.16859	18.1153	2.07921e-05	0.00918192
peak_39621	chr2	104863773	104864097	chr2:104863773_104864097	160693	LOC100287010	Distal Intergenic	1.9301	3.05776	18.0443	2.15823e-05	0.00918192
peak_44155	chr20	43507219	43508469	chr20:43507219_43508469	-5875	YWHAB	Distal Intergenic	1.9762	2.96289	18.0309	2.17344e-05	0.00918192
peak_48490	chr3	28326562	28326886	chr3:28326562_28326886	43438	CMC1	Intron	1.36912	2.45743	18.0666	2.13313e-05	0.00918192
peak_53013	chr4	46377672	46377988	chr4:46377672_46377988	14433	GABRA2	Intron	1.83543	2.87741	18.0983	2.09784e-05	0.00918192
peak_67495	chr7	144354786	144356465	chr7:144354786_144356465	176681	TPK1	Intron	1.96601	3.10169	17.9818	2.2303e-05	0.00929651
peak_48130	chr3	12903278	12903589	chr3:12903278_12903589	-20197	RPL32	Distal Intergenic	2.01096	2.25377	17.7562	2.51099e-05	0.0103288
peak_59449	chr6	7541262	7542831	chr6:7541262_7542831	0	DSP	Promoter	1.86326	4.16929	17.7065	2.57742e-05	0.0104643
peak_41100	chr2	181224807	181225162	chr2:181224807_181225162	-352967	CWC22	Distal Intergenic	1.25986	3.49759	17.6406	2.66826e-05	0.0106943
peak_69776	chr8	100719593	100723186	chr8:100719593_100723186	-170504	MIR875	Intron	-0.812999	5.28602	17.6088	2.71332e-05	0.0107372
peak_16305	chr12	54776857	54778031	chr12:54776857_54778031	7052	ZNF385A	Intron	1.80104	3.93728	17.553	2.79415e-05	0.0109188
peak_38103	chr2	55268461	55270081	chr2:55268461_55270081	7653	RTN4	Intron	2.10943	2.52051	17.4274	2.98492e-05	0.0115203
peak_52920	chr4	40055465	40058329	chr4:40055465_40058329	-195	N4BP2	Promoter	1.78092	4.366	17.3773	3.06464e-05	0.0116838
peak_35731	chr19	45248514	45249053	chr19:45248514_45249053	-2925	BCL3	Distal Intergenic	1.86457	3.34838	17.2062	3.35331e-05	0.0126303
peak_54867	chr4	184343528	184344292	chr4:184343528_184344292	-21497	CDKN2AIP	Distal Intergenic	1.99247	2.30966	17.1638	3.42914e-05	0.0127621
peak_15273	chr12	34905051	34905302	chr12:34905051_34905302	729835	ALG10	Distal Intergenic	2.0635	2.52275	17.1351	3.48123e-05	0.0128036
peak_74821	chrX	19715871	19716698	chrX:19715871_19716698	-182492	MAP3K15	Intron	2.41949	3.52212	17.1049	3.53715e-05	0.0128579
peak_68702	chr8	29752312	29753076	chr8:29752312_29753076	-25953	LINC02209	Distal Intergenic	-0.824447	5.23718	16.9913	3.75522e-05	0.0133508
peak_35641	chr19	43532508	43534673	chr19:43532508_43534673	-1877	PSG11	Promoter	2.09752	2.33664	16.9898	3.75815e-05	0.0133508
peak_60405	chr6	36678343	36681003	chr6:36678343_36681003	12715	RAB44	Intron	1.78451	2.61748	16.9245	3.88967e-05	0.0136628
peak_49117	chr3	48788500	48789171	chr3:48788500_48789171	-33580	IP6K2	3' UTR	2.19517	2.31295	16.897	3.94636e-05	0.0137079
peak_71124	chr9	21576089	21577244	chr9:21576089_21577244	-16392	MIR31HG	Distal Intergenic	1.96441	3.58282	16.8422	4.06197e-05	0.0139544
peak_56341	chr5	49296613	49297286	chr5:49296613_49297286	439948	EMB	Distal Intergenic	1.71573	2.66362	16.795	4.16422e-05	0.0141502
peak_67724	chr7	152267912	152268146	chr7:152267912_152268146	105104	XRCC2	Distal Intergenic	1.78875	3.15738	16.7409	4.28476e-05	0.01425
peak_26256	chr16	48621331	48622432	chr16:48621331_48622432	21688	N4BP1	Intron	2.1934	2.10304	16.746	4.2733e-05	0.01425
peak_75760	chrX	101418006	101418967	chrX:101418006_101418967	-7020	BEX5	Distal Intergenic	1.74619	9.35245	16.6021	4.60991e-05	0.01517
peak_65397	chr7	51467356	51468138	chr7:51467356_51468138	-82841	COBL	Distal Intergenic	-0.755558	5.29286	16.5761	4.67351e-05	0.0152191
peak_12685	chr11	66568007	66568892	chr11:66568007_66568892	-41991	RCE1	Exon	2.10892	2.54208	16.5546	4.7269e-05	0.0152343
peak_13361	chr11	96079802	96080047	chr11:96079802_96080047	-3458	MAML2	Distal Intergenic	1.85504	4.84385	16.2947	5.4216e-05	0.0169576
peak_20533	chr14	40629796	40630077	chr14:40629796_40630077	-728092	FBXO33	Distal Intergenic	1.93395	3.25551	16.2937	5.42434e-05	0.0169576
peak_61283	chr6	89145367	89147315	chr6:89145367_89147315	-269600	CNR1	Distal Intergenic	1.87455	3.50165	16.2986	5.41039e-05	0.0169576
peak_14675	chr12	8066080	8067046	chr12:8066080_8067046	21846	SLC2A3	Distal Intergenic	1.81671	3.73911	16.2451	5.56537e-05	0.0172262
peak_55182	chr5	14168365	14168720	chr5:14168365_14168720	24536	TRIO	Intron	1.75011	2.80886	16.1692	5.7927e-05	0.017754
peak_36054	chr19	49055948	49057298	chr19:49055948_49057298	519	SULT2B1	Intron	1.9038	2.17847	16.0841	6.05908e-05	0.0182536
peak_51121	chr3	150545528	150547578	chr3:150545528_150547578	-22693	CLRN1-AS1	Distal Intergenic	1.94807	2.09753	16.0618	6.13086e-05	0.0182536
peak_68223	chr8	10630134	10630874	chr8:10630134_10630874	52079	MIR1322	Intron	1.2021	4.01126	16.0788	6.07613e-05	0.0182536
peak_41917	chr2	216006343	216006615	chr2:216006343_216006615	-3192	ABCA12	Distal Intergenic	1.86504	2.28631	15.9401	6.5379e-05	0.0192819
peak_64577	chr7	8131725	8132807	chr7:8131725_8132807	123351	GLCCI1	Distal Intergenic	-1.52351	4.06728	15.8721	6.77711e-05	0.0198006
peak_3851	chr1	123197553	123198155	chr1:123197553_123198155	1936643	EMBP1	Distal Intergenic	1.90562	4.57172	15.767	7.16431e-05	0.020738
peak_13367	chr11	96111464	96111665	chr11:96111464_96111665	11418	CCDC82	Intron	1.80818	5.38354	15.683	7.48931e-05	0.0214799
peak_73001	chr9	103012096	103012305	chr9:103012096_103012305	102954	TEX10	Intron	-1.59343	6.02154	15.6409	7.65797e-05	0.021764
peak_65958	chr7	70361741	70362135	chr7:70361741_70362135	-235388	GALNT17	Distal Intergenic	2.13406	2.91526	15.6073	7.79515e-05	0.0219542
peak_46545	chr22	21534434	21535264	chr22:21534434_21535264	77129	BCRP2	Distal Intergenic	1.51475	2.584	15.5522	8.02575e-05	0.0224019
peak_44991	chr21	7916080	7918134	chr21:7916080_7918134	-1907698	MIR3648-1	Distal Intergenic	1.7827	2.24868	15.4604	8.42532e-05	0.0233091
peak_49637	chr3	71161997	71162461	chr3:71161997_71162461	428779	MIR1284	Intron	1.92391	2.65447	15.3737	8.82092e-05	0.0241894
peak_55674	chr5	47471270	47471576	chr5:47471270_47471576	-1775050	HCN1	Distal Intergenic	1.413	3.41801	15.3406	8.97663e-05	0.0244024
peak_64759	chr7	23696939	23697364	chr7:23696939_23697364	-22385	FAM221A	Distal Intergenic	2.04178	2.97474	15.2719	9.30899e-05	0.0250877
peak_6611	chr1	211228559	211229860	chr1:211228559_211229860	77597	KCNH1	Intron	2.12512	2.42782	15.2448	9.44345e-05	0.0252326
peak_61671	chr6	111427489	111427696	chr6:111427489_111427696	18708	SLC16A10	Intron	1.6895	2.69783	15.2082	9.62839e-05	0.0252944
peak_54756	chr4	173231879	173232168	chr4:173231879_173232168	497304	GALNTL6	Intron	1.6528	2.68088	15.2137	9.60028e-05	0.0252944
peak_28196	chr17	18900610	18901919	chr17:18900610_18901919	6141	FAM83G	Intron	2.18616	3.27095	15.1659	9.84667e-05	0.0254402
peak_35515	chr19	41192708	41193811	chr19:41192708_41193811	2745	NUMBL	Exon	1.99497	3.76736	15.1813	9.76651e-05	0.0254402
peak_56289	chr5	49165719	49165930	chr5:49165719_49165930	571304	EMB	Distal Intergenic	1.0084	4.1352	15.0967	0.000102144	0.0259611
peak_68946	chr8	44035904	44036201	chr8:44035904_44036201	888319	POTEA	Distal Intergenic	-0.717242	5.30821	15.1032	0.000101789	0.0259611
peak_24064	chr15	75508873	75509331	chr15:75508873_75509331	17640	C15orf39	Distal Intergenic	1.77804	5.58536	15.0123	0.000106812	0.0267133
peak_46022	chr21	46153221	46153473	chr21:46153221_46153473	-21726	TSPEAR	Distal Intergenic	1.71419	2.62533	15.0143	0.000106699	0.0267133
peak_3952	chr1	123480358	123481591	chr1:123480358_123481591	2219448	EMBP1	Distal Intergenic	1.80039	4.34361	14.9956	0.000107764	0.0267375
peak_61835	chr6	118808803	118809684	chr6:118808803_118809684	-12852	BRD7P3	Intron	0.711421	5.02202	14.9582	0.000109917	0.0268769
peak_69259	chr8	66058508	66058835	chr8:66058508_66058835	33740	LINC00251	Distal Intergenic	-0.682822	5.27912	14.9413	0.000110905	0.0268769
peak_34650	chr19	26228986	26229444	chr19:26228986_26229444	-1882737	HAVCR1P1	Distal Intergenic	2.59304	3.06079	14.9511	0.000110336	0.0268769
peak_6876	chr1	224922603	224922913	chr1:224922603_224922913	118424	CNIH3	Intron	1.85959	4.83448	14.9214	0.000112086	0.026954
peak_75220	chrX	48648220	48648701	chrX:48648220_48648701	3238	GATA1	Intron	2.31786	2.4134	14.879	0.000114631	0.0273556
peak_5322	chr1	160862561	160862929	chr1:160862561_160862929	-7601	ITLN1	Distal Intergenic	1.80407	3.80259	14.8442	0.000116764	0.0275011
peak_9821	chr10	88116902	88117732	chr10:88116902_88117732	8518	GRID1	Intron	1.61244	4.20206	14.8404	0.000117	0.0275011
peak_34970	chr19	27050009	27050283	chr19:27050009_27050283	1234565	LINC00662	Distal Intergenic	1.70374	2.76634	14.7784	0.000120915	0.0282094
peak_4089	chr1	123850979	123851253	chr1:123850979_123851253	2590069	EMBP1	Distal Intergenic	1.81405	3.56672	14.7214	0.000124627	0.0284068
peak_16401	chr12	56628523	56630660	chr12:56628523_56630660	4703	SLC39A5	3' UTR	1.81134	4.2332	14.7354	0.000123698	0.0284068
peak_20509	chr14	38255239	38256633	chr14:38255239_38256633	-190914	FOXA1	Intron	2.4835	2.43979	14.7097	0.000125396	0.0284068
peak_71087	chr9	20683389	20685494	chr9:20683389_20685494	25080	FOCAD	Intron	-0.795387	5.26554	14.7246	0.000124411	0.0284068
peak_16358	chr12	56032018	56032550	chr12:56032018_56032550	1342	OR10P1	Distal Intergenic	2.12917	2.47602	14.5205	0.000138642	0.0305407
peak_39271	chr2	94208334	94208970	chr2:94208334_94208970	1217959	FAM95A	Distal Intergenic	2.598	2.20144	14.5194	0.000138724	0.0305407
peak_42602	chr2	239399555	239402206	chr2:239399555_239402206	61934	LINC01107	Distal Intergenic	1.8359	2.82359	14.5521	0.000136336	0.0305407
peak_60419	chr6	36924237	36924491	chr6:36924237_36924491	8198	PI16	Intron	2.10874	2.25275	14.5371	0.000137429	0.0305407
peak_29860	chr17	61940341	61940887	chr17:61940341_61940887	5965	TCAM1P	Exon	1.84625	5.6882	14.4874	0.000141101	0.0308469
peak_26030	chr16	30394981	30396167	chr16:30394981_30396167	-810	SEPTIN1	Promoter	1.91129	6.20003	14.4582	0.000143302	0.0311104
peak_47647	chr22	50148946	50149738	chr22:50148946_50149738	24220	NA	Distal Intergenic	1.19631	3.11793	14.4435	0.000144428	0.0311388
peak_23788	chr15	67481470	67481982	chr15:67481470_67481982	-65156	IQCH	Intron	1.62414	2.97816	14.3815	0.000149259	0.0317424
peak_54536	chr4	152553855	152555096	chr4:152553855_152555096	127079	GATB	Intron	1.66639	2.40578	14.3876	0.00014878	0.0317424
peak_5409	chr1	162560729	162562782	chr1:162560729_162562782	29433	UAP1	Intron	2.02594	2.33677	14.3304	0.000153364	0.0321166
peak_48118	chr3	12662139	12664790	chr3:12662139_12664790	40910	RAF1	Intron	0.689575	5.31569	14.3109	0.000154967	0.0321166
peak_8553	chr10	35586156	35586421	chr10:35586156_35586421	50203	CCNY	Intron	1.69618	2.51252	14.333	0.000153156	0.0321166
peak_65777	chr7	60315679	60315978	chr7:60315679_60315978	2448456	ZNF733P	Distal Intergenic	1.35771	3.18731	14.3089	0.000155128	0.0321166
peak_66367	chr7	96837355	96838258	chr7:96837355_96838258	91450	SDHAF3	Distal Intergenic	2.41838	2.56312	14.2719	0.000158211	0.0322814
peak_73974	chr9	136984849	136985598	chr9:136984849_136985598	-15612	WDR5	Distal Intergenic	1.19708	3.0171	14.2697	0.000158394	0.0322814
peak_42129	chr2	224574467	224575309	chr2:224574467_224575309	-107250	SCG2	Distal Intergenic	1.9609	3.42732	14.2623	0.000159022	0.0322814
peak_13621	chr11	112588113	112588570	chr11:112588113_112588570	-243399	NCAM1	Distal Intergenic	1.84351	3.82145	14.2114	0.000163379	0.0325151
peak_18011	chr12	124910451	124915273	chr12:124910451_124915273	136737	NCOR2	Exon	1.69004	2.20867	14.2004	0.000164333	0.0325151
peak_48222	chr3	15320128	15321108	chr3:15320128_15321108	24437	SH3BP5-AS1	Intron	1.98316	5.41275	14.2177	0.000162834	0.0325151
peak_49126	chr3	49006639	49008452	chr3:49006639_49008452	-18889	P4HTM	Exon	2.13052	2.62961	14.216	0.000162976	0.0325151
peak_67595	chr7	150468039	150469139	chr7:150468039_150469139	-28715	TMEM176A	Distal Intergenic	1.20095	3.05256	14.1609	0.000167818	0.0327493
peak_71931	chr9	44453162	44453620	chr9:44453162_44453620	-536616	FAM27C	Distal Intergenic	1.01002	3.96619	14.1649	0.000167467	0.0327493
peak_28167	chr17	18191931	18192203	chr17:18191931_18192203	26118	TOP3A	Intron	1.73361	2.80269	14.1515	0.00016866	0.0327493
peak_43374	chr20	27112449	27112918	chr20:27112449_27112918	-922580	MIR663AHG	Distal Intergenic	1.69295	3.81826	14.061	0.000176978	0.0337358
peak_43774	chr20	32109105	32110320	chr20:32109105_32110320	31177	CBFA2T2	Intron	1.95484	2.55175	14.0617	0.000176906	0.0337358
peak_50966	chr3	140974998	140975332	chr3:140974998_140975332	24316	PXYLP1	Intron	2.28728	2.27644	14.0615	0.000176928	0.0337358
peak_5305	chr1	160722780	160722981	chr1:160722780_160722981	13703	SLAMF7	3' UTR	2.34603	2.14227	14.039	0.000179057	0.0339253
peak_33106	chr19	6536036	6536629	chr19:6536036_6536629	5026	TNFSF9	Distal Intergenic	2.09336	2.87005	14.0233	0.000180556	0.0339404
peak_51325	chr3	158809580	158810011	chr3:158809580_158810011	22539	IQCJ	Intron	1.92953	2.28888	14.0155	0.000181308	0.0339404
peak_38726	chr2	85602083	85603646	chr2:85602083_85603646	20240	ELMOD3	Intron	-0.938015	5.48281	13.9927	0.000183525	0.0339488
peak_39438	chr2	98615319	98616072	chr2:98615319_98616072	-2965	TMEM131	Distal Intergenic	1.26386	4.26995	13.9988	0.000182926	0.0339488
peak_7130	chr1	230977156	230980296	chr1:230977156_230980296	25039	C1orf198	5' UTR	1.83641	3.23318	13.9816	0.000184611	0.0339489
peak_52255	chr4	1187089	1187613	chr4:1187089_1187613	15137	LOC100130872	Intron	1.71456	2.31191	13.9393	0.000188811	0.0345183
peak_50724	chr3	128592032	128592254	chr3:128592032_128592254	-1648	LOC653712	Promoter	1.91461	2.16452	13.8232	0.00020084	0.0365039
peak_44709	chr20	61943362	61943766	chr20:61943362_61943766	18824	COL20A1	Exon	2.16549	2.17065	13.749	0.000208928	0.0377543
peak_58546	chr5	157190441	157190958	chr5:157190441_157190958	19686	LSM11	Distal Intergenic	1.88717	2.58761	13.7081	0.000213535	0.0383651
peak_5085	chr1	155856822	155857724	chr1:155856822_155857724	23469	RIT1	Distal Intergenic	2.01597	2.50248	13.6674	0.000218212	0.0387598
peak_73900	chr9	136075962	136076493	chr9:136075962_136076493	8135	OBP2B	Distal Intergenic	1.33507	3.51513	13.6722	0.000217656	0.0387598
peak_12079	chr11	52320577	52321140	chr11:52320577_52321140	805295	OR4C46	Distal Intergenic	1.84038	5.44055	13.6148	0.000224411	0.0396359
peak_69358	chr8	74984383	74985370	chr8:74984383_74985370	80819	LY96	Distal Intergenic	1.362	3.69223	13.5524	0.000231992	0.0407446
peak_37950	chr2	46431137	46431683	chr2:46431137_46431683	-92858	EPAS1	Distal Intergenic	1.10222	3.68634	13.479	0.000241243	0.0416671
peak_42230	chr2	230225051	230227423	chr2:230225051_230227423	-88994	PID1	Intron	1.79026	2.34148	13.4887	0.000240006	0.0416671
peak_65491	chr7	58388608	58388824	chr7:58388608_58388824	878725	ZNF716	Distal Intergenic	1.74675	3.51688	13.4846	0.000240532	0.0416671
peak_54125	chr4	114396875	114397180	chr4:114396875_114397180	285903	CAMK2D	Intron	1.708	2.11164	13.4256	0.000248216	0.0423283
peak_55129	chr5	6582962	6583500	chr5:6582962_6583500	675	LINC01018	Exon	1.40197	2.91442	13.4231	0.000248547	0.0423283
peak_65055	chr7	36784681	36785580	chr7:36784681_36785580	-20527	AOAH	Distal Intergenic	-0.609671	6.13818	13.4187	0.000249133	0.0423283
peak_53081	chr4	49955500	49955939	chr4:49955500_49955939	967235	CWH43	Distal Intergenic	1.89451	2.40825	13.3864	0.000253455	0.04271
peak_53978	chr4	108152727	108153316	chr4:108152727_108153316	51530	DKK2	Intron	1.68941	7.83042	13.3815	0.000254113	0.04271
peak_16307	chr12	54888350	54888910	chr12:54888350_54888910	-2585	NCKAP1L	Distal Intergenic	2.00289	5.33375	13.3252	0.000261862	0.0428604
peak_27861	chr17	7627028	7628320	chr17:7627028_7628320	5949	DNAH2	Intron	1.7094	5.64881	13.3262	0.000261718	0.0428604
peak_49671	chr3	71384736	71385504	chr3:71384736_71385504	205736	MIR1284	Intron	1.59276	2.17734	13.3473	0.000258799	0.0428604
peak_65886	chr7	65251976	65252553	chr7:65251976_65252553	-16179	LOC441242	Distal Intergenic	1.38081	3.37561	13.3616	0.000256828	0.0428604
peak_67541	chr7	149195129	149196949	chr7:149195129_149196949	-231	ZNF746	Promoter	2.38195	3.29643	13.3266	0.000261668	0.0428604
peak_55267	chr5	22970924	22971289	chr5:22970924_22971289	-117193	CDH12	Distal Intergenic	2.20819	3.56701	13.3081	0.000264262	0.0430279
peak_41357	chr2	195575943	195576397	chr2:195575943_195576397	-945135	SLC39A10	Distal Intergenic	2.10086	2.26045	13.2738	0.000269144	0.0433274
peak_43632	chr20	28875974	28876366	chr20:28875974_28876366	-735513	FRG1BP	Distal Intergenic	1.42427	2.98346	13.2737	0.000269152	0.0433274
peak_50176	chr3	101769068	101770004	chr3:101769068_101770004	-48084	ZPLD1	Distal Intergenic	1.88718	3.6526	13.266	0.000270259	0.0433274
peak_10529	chr10	119292560	119293451	chr10:119292560_119293451	-8505	EMX2	Intron	1.84681	4.17629	13.2002	0.000279926	0.0441238
peak_21347	chr14	74888037	74888409	chr14:74888037_74888409	4396	SYNDIG1L	Intron	2.09161	2.26858	13.1884	0.000281683	0.0441238
peak_21629	chr14	91310516	91311714	chr14:91310516_91311714	-27755	TTC7B	Distal Intergenic	1.86583	2.09772	13.1962	0.000280521	0.0441238
peak_37136	chr2	10124655	10124924	chr2:10124655_10124924	32863	GRHL1	Intron	2.02394	2.09508	13.1844	0.000282284	0.0441238
peak_51810	chr3	187958458	187959253	chr3:187958458_187959253	62127	FLJ42393	Intron	1.65207	2.24356	13.2216	0.000276739	0.0441238
peak_66835	chr7	112459798	112460015	chr7:112459798_112460015	-29320	TMEM168	3' UTR	1.60214	3.59967	13.1229	0.000291708	0.04537
peak_34475	chr19	25756532	25757065	chr19:25756532_25757065	-1410283	HAVCR1P1	Distal Intergenic	1.75837	6.05737	13.0937	0.000296284	0.0457563
peak_59085	chr5	181260391	181262604	chr5:181260391_181262604	466103	OR4F16	Distal Intergenic	0.87716	4.01164	13.0885	0.000297119	0.0457563
peak_23633	chr15	64387255	64388287	chr15:64387255_64388287	0	SNX1	Promoter	1.66681	2.27649	13.0643	0.000300982	0.046124
peak_50868	chr3	134294182	134294781	chr3:134294182_134294781	75697	KY	Distal Intergenic	1.79988	2.10732	13.035	0.000305725	0.0462472
peak_55011	chr5	191289	192063	chr5:191289_192063	0	LRRC14B	Promoter	1.78255	3.82348	13.0376	0.000305294	0.0462472
peak_69482	chr8	81795259	81795826	chr8:81795259_81795826	-8243	ZNF704	Distal Intergenic	1.62872	2.56711	13.0319	0.000306224	0.0462472
peak_47924	chr3	876321	876705	chr3:876321_876705	-257915	CNTN6	Intron	2.25957	2.13149	13.0214	0.000307955	0.046285
peak_4201	chr1	124179320	124179642	chr1:124179320_124179642	2918410	EMBP1	Distal Intergenic	1.87929	3.76064	12.9819	0.00031452	0.0470456
peak_53522	chr4	80201907	80203635	chr4:80201907_80203635	43536	NAA11	Intron	1.72581	7.78035	12.922	0.00032475	0.0483444
peak_32011	chr18	46167840	46168377	chr18:46167840_46168377	-28594	MIR4743	Intron	1.79558	6.54523	12.901	0.000328401	0.0486563
peak_41452	chr2	197205365	197206455	chr2:197205365_197206455	-164138	STK17B	Intron	1.6242	3.69473	12.8097	0.000344829	0.0506106
peak_53074	chr4	49797478	49798689	chr4:49797478_49798689	809213	CWH43	Distal Intergenic	1.98741	2.72812	12.8184	0.00034322	0.0506106
peak_70854	chr9	4334358	4334576	chr9:4334358_4334576	-34323	GLIS3	Distal Intergenic	1.52443	2.42531	12.7965	0.000347272	0.0507309
peak_29159	chr17	43018169	43019183	chr17:43018169_43019183	5896	KIF18B	Intron	1.64309	4.26876	12.7789	0.000350558	0.0507368
peak_52528	chr4	8631182	8631507	chr4:8631182_8631507	48965	CPZ	Distal Intergenic	-1.3942	4.21715	12.7822	0.000349933	0.0507368
peak_33681	chr19	14512314	14514496	chr19:14512314_14514496	15699	DDX39A	Exon	1.80831	5.47661	12.761	0.000353917	0.0508986
peak_53080	chr4	49939226	49939558	chr4:49939226_49939558	950961	CWH43	Distal Intergenic	1.5181	2.51666	12.7557	0.000354932	0.0508986
peak_41231	chr2	190382801	190383627	chr2:190382801_190383627	64857	SLC40A1	Distal Intergenic	1.75456	3.19089	12.7446	0.000357041	0.0509671
peak_42966	chr20	5567712	5568091	chr20:5567712_5568091	23581	GPCPD1	Intron	1.9885	2.45863	12.7183	0.000362093	0.0514535
peak_44629	chr20	57856806	57857009	chr20:57856806_57857009	-18490	EDN3	Distal Intergenic	1.25903	4.37379	12.6952	0.000366602	0.0518585
peak_37160	chr2	10689243	10690725	chr2:10689243_10690725	-100790	ODC1	Distal Intergenic	1.91043	3.34976	12.6739	0.000370792	0.0522149
peak_26748	chr16	70437251	70439876	chr16:70437251_70439876	33115	ST3GAL2	Intron	1.67982	6.0834	12.6415	0.000377277	0.0526207
peak_33694	chr19	14888686	14889061	chr19:14888686_14889061	292	ADGRE2	Intron	-0.990369	3.79759	12.6343	0.000378723	0.0526207
peak_56862	chr5	68214757	68217133	chr5:68214757_68217133	-172643	SLC30A5	Distal Intergenic	2.0957	2.53128	12.6481	0.000375949	0.0526207
peak_6485	chr1	206828966	206830209	chr1:206828966_206830209	20085	DYRK3	Intron	1.7327	3.00576	12.6117	0.000383344	0.0529201
peak_26082	chr16	30996803	30997920	chr16:30996803_30997920	284	HSD3B7	5' UTR	1.15551	3.35362	12.6072	0.000384264	0.0529201
peak_22684	chr15	21284248	21284914	chr15:21284248_21284914	138481	LINC01193	Distal Intergenic	1.32887	3.18607	12.578	0.000390315	0.0535177
peak_61166	chr6	75526511	75526788	chr6:75526511_75526788	388835	COL12A1	Distal Intergenic	2.31598	2.12102	12.5575	0.000394626	0.0537191
peak_41191	chr2	189179430	189179788	chr2:189179430_189179788	17211	MIR561	Intron	1.84284	3.57786	12.5547	0.000395221	0.0537191
peak_6696	chr1	213982865	213983530	chr1:213982865_213983530	-114562	LINC00538	Distal Intergenic	2.43397	2.47598	12.5417	0.000397962	0.0538575
peak_11101	chr11	3681998	3682263	chr11:3681998_3682263	10351	CHRNA10	Intron	1.19825	2.60163	12.528	0.0004009	0.0540212
peak_61384	chr6	90403642	90403976	chr6:90403642_90403976	-55168	LYRM2	Exon	1.54887	4.16516	12.4455	0.000418992	0.0559525
peak_12754	chr11	67459840	67460193	chr11:67459840_67460193	-11155	ALDH3B2	Distal Intergenic	1.82604	2.71632	12.4384	0.000420601	0.0559525
peak_55221	chr5	14957363	14958048	chr5:14957363_14958048	-85476	ANKH	Distal Intergenic	2.4379	3.08356	12.4488	0.000418257	0.0559525
peak_50935	chr3	138769940	138770464	chr3:138769940_138770464	-6206	PRR23C	Distal Intergenic	1.76101	2.1378	12.4232	0.000424029	0.0561695
peak_25994	chr16	30004666	30005176	chr16:30004666_30005176	2241	HIRIP3	3' UTR	2.10791	3.43714	12.4045	0.000428312	0.0564974
peak_67231	chr7	135672771	135673266	chr7:135672771_135673266	-10567	LUZP6	Distal Intergenic	1.82441	4.8645	12.3764	0.000434805	0.057113
peak_18777	chr13	40591104	40591452	chr13:40591104_40591452	-164494	LINC00332	Distal Intergenic	-1.36915	3.16708	12.3177	0.000448691	0.0579627
peak_19257	chr13	71827909	71828901	chr13:71827909_71828901	238636	LINC00348	Distal Intergenic	1.75777	3.84878	12.3259	0.000446717	0.0579627
peak_39996	chr2	118902553	118903006	chr2:118902553_118903006	56503	INSIG2	Distal Intergenic	1.63787	3.51757	12.3382	0.000443775	0.0579627
peak_43106	chr20	18805314	18806438	chr20:18805314_18806438	4401	C20orf78	Exon	1.44879	2.28198	12.3203	0.000448067	0.0579627
peak_71406	chr9	37364875	37365150	chr9:37364875_37365150	-57531	GRHPR	Distal Intergenic	1.98603	5.18559	12.2872	0.000456069	0.0585364
peak_76307	chrX	147653928	147654341	chrX:147653928_147654341	71789	AFF2	Intron	1.66212	4.50607	12.2839	0.000456877	0.0585364
peak_73158	chr9	112844821	112845070	chr9:112844821_112845070	33943	AKAP2	Intron	1.5182	2.99271	12.26	0.00046277	0.0590495
peak_58525	chr5	156922229	156922778	chr5:156922229_156922778	35202	NIPAL4	Intron	1.55189	2.54617	12.2382	0.000468204	0.0595
peak_49081	chr3	47897897	47898412	chr3:47897897_47898412	6852	MIR1226	Intron	1.91737	2.63321	12.2296	0.000470369	0.0595331
peak_5739	chr1	179025365	179027045	chr1:179025365_179027045	-24067	TOR3A	Intron	1.67232	4.94369	12.164	0.000487219	0.0611743
peak_22897	chr15	34061821	34062529	chr15:34061821_34062529	-198560	CHRM5	Intron	1.62292	2.71494	12.1564	0.000489197	0.0611743
peak_37611	chr2	30472518	30472719	chr2:30472518_30472719	18121	LBH	Intron	1.91137	2.37608	12.1537	0.00048991	0.0611743
peak_70530	chr8	143420765	143422422	chr8:143420765_143422422	62121	TSNARE1	Intron	-1.10989	4.4748	12.1415	0.00049312	0.0611743
peak_71384	chr9	36492688	36494062	chr9:36492688_36494062	-78797	MELK	Distal Intergenic	1.33604	3.25111	12.1416	0.000493083	0.0611743
peak_9729	chr10	80522704	80523441	chr10:80522704_80523441	305095	ZMIZ1-AS1	Distal Intergenic	1.72227	3.84515	12.121	0.000498573	0.0616063
peak_46130	chr22	12280095	12280350	chr22:12280095_12280350	4007587	POTEH	Distal Intergenic	1.82064	3.90463	12.0924	0.000506273	0.0623115
peak_33847	chr19	17346109	17346793	chr19:17346109_17346793	9054	OCEL1	Exon	1.12418	3.03734	12.0488	0.000518262	0.0625556
peak_35697	chr19	44762090	44762345	chr19:44762090_44762345	-1688	ZNF233	Promoter	1.82869	2.55456	12.0579	0.00051573	0.0625556
peak_54218	chr4	122576974	122577254	chr4:122576974_122577254	40893	ANXA5	Distal Intergenic	1.61134	3.66431	12.0663	0.000513411	0.0625556
peak_6731	chr1	218163955	218165388	chr1:218163955_218165388	97713	LINC00210	Distal Intergenic	1.88833	3.47228	12.0556	0.00051638	0.0625556
peak_71152	chr9	26940481	26940979	chr9:26940481_26940979	-6058	IFT74	Intron	-0.833507	4.71725	12.0753	0.000510954	0.0625556
peak_27932	chr17	8629705	8631841	chr17:8629705_8631841	16313	CCDC42	Downstream	1.18439	2.63724	12.0297	0.000523596	0.0629564
peak_43585	chr20	28463372	28463690	chr20:28463372_28463690	-1148189	FRG1BP	Distal Intergenic	1.70369	3.45106	12.0061	0.000530267	0.0635142
peak_47561	chr22	46366645	46368034	chr22:46366645_46368034	4974	WNT7B	Intron	1.13576	3.14149	11.995	0.000533424	0.0636485
peak_66141	chr7	76364673	76365003	chr7:76364673_76365003	-108053	POMZP3	Distal Intergenic	1.78444	3.63032	11.9454	0.000547819	0.0648709
peak_58046	chr5	137498787	137499450	chr5:137498787_137499450	14908	BRD8	Exon	2.05388	4.77905	11.9457	0.000547744	0.0648709
peak_37046	chr2	7516965	7517674	chr2:7516965_7517674	-43718	LOC100506274	Distal Intergenic	1.90227	2.45778	11.9193	0.000555568	0.0655402
peak_6905	chr1	225939251	225939694	chr1:225939251_225939694	-25821	SRP9	Exon	1.64169	4.12644	11.9041	0.000560118	0.0657403
peak_66169	chr7	77222627	77223532	chr7:77222627_77223532	55854	PTPN12	Intron	-0.956183	3.80916	11.8614	0.000573088	0.0657403
peak_12599	chr11	65569314	65570856	chr11:65569314_65570856	14809	OVOL1	Distal Intergenic	2.17599	2.6509	11.8815	0.000566934	0.0657403
peak_38141	chr2	60141302	60141966	chr2:60141302_60141966	472614	MIR4432	Distal Intergenic	0.930608	3.91083	11.861	0.000573225	0.0657403
peak_40005	chr2	119660033	119660441	chr2:119660033_119660441	-39304	MARCO	Distal Intergenic	1.42545	3.16905	11.8731	0.000569504	0.0657403
peak_44280	chr20	45890029	45891900	chr20:45890029_45891900	-55346	LOC100131496	Exon	1.75139	3.49568	11.897	0.000562252	0.0657403
peak_54708	chr4	167021567	167022175	chr4:167021567_167022175	227157	TLL1	3' UTR	1.96278	2.81156	11.8582	0.000574087	0.0657403
peak_55284	chr5	25738816	25739032	chr5:25738816_25739032	-898124	LINC02239	Distal Intergenic	1.3945	3.56804	11.8926	0.000563589	0.0657403
peak_74530	chrX	1452329	1454457	chrX:1452329_1454457	1078931	LINC00102	Intron	1.38223	5.11645	11.8455	0.000578011	0.0659481
peak_31868	chr18	32084884	32086342	chr18:32084884_32086342	11630	DTNA	Intron	-1.00358	4.0582	11.8056	0.000590524	0.0666461
peak_67576	chr7	150003423	150003634	chr7:150003423_150003634	-2996	LRRC61	Intron	-2.22104	2.93755	11.8174	0.000586797	0.0666461
peak_73195	chr9	114155221	114156846	chr9:114155221_114156846	-64508	OR2K2	Exon	0.716647	5.66291	11.809	0.000589462	0.0666461
peak_16534	chr12	62525141	62525652	chr12:62525141_62525652	128273	TAFA2	Intron	1.74907	6.40821	11.7722	0.000601229	0.0676102
peak_60085	chr6	30060754	30062039	chr6:30060754_30062039	-1577184	GPX6	Distal Intergenic	1.47736	4.68886	11.7508	0.000608157	0.0681441
peak_26254	chr16	48609094	48610517	chr16:48609094_48610517	33603	N4BP1	Intron	2.25587	4.30843	11.6978	0.000625727	0.0698624
peak_27723	chr17	4902927	4903905	chr17:4902927_4903905	1684	KIF1C	5' UTR	1.60776	2.43637	11.6711	0.000634774	0.0706203
peak_31712	chr18	21110394	21112553	chr18:21110394_21112553	26960	RMC1	3' UTR	1.30728	2.48766	11.6434	0.000644324	0.0714286
peak_45580	chr21	35932239	35933021	chr21:35932239_35933021	-47666	KCNE1	Intron	2.12208	5.06208	11.6302	0.000648897	0.0715595
peak_6300	chr1	203320399	203321562	chr1:203320399_203321562	-110	FMOD	Promoter	1.94524	3.47966	11.6268	0.000650084	0.0715595
peak_46714	chr22	25178917	25179247	chr22:25178917_25179247	-8230	PIWIL3	Distal Intergenic	2.04518	2.38895	11.5944	0.00066151	0.0725618
peak_66511	chr7	100672940	100676528	chr7:100672940_100676528	9576	MUC17	Exon	-1.10302	4.07434	11.5848	0.000664917	0.0726806
peak_42146	chr2	224933526	224933777	chr2:224933526_224933777	-29490	SERPINE2	Distal Intergenic	1.90981	2.85412	11.5546	0.000675833	0.0736163
peak_31302	chr18	3296748	3298017	chr18:3296748_3298017	34637	MYL12B	Distal Intergenic	1.65442	4.66716	11.5388	0.000681586	0.0739852
peak_63049	chr6	167734447	167735045	chr6:167734447_167735045	-3529	TTLL2	Distal Intergenic	0.915486	4.63353	11.5145	0.000690562	0.0747002
peak_16446	chr12	57458955	57460612	chr12:57458955_57460612	11962	NEMP1	Intron	1.68558	5.63021	11.4899	0.000699747	0.0754328
peak_50453	chr3	113626889	113627100	chr3:113626889_113627100	-39648	ZDHHC23	Intron	1.76994	5.28503	11.4758	0.000705088	0.0757473
peak_24634	chr15	94287886	94288119	chr15:94287886_94288119	-486682	MCTP2	Distal Intergenic	2.05788	2.82226	11.4606	0.000710887	0.0761088
peak_56214	chr5	48970121	48970557	chr5:48970121_48970557	766677	EMB	Distal Intergenic	-1.12525	3.12559	11.4242	0.000724948	0.0773493
peak_72697	chr9	91784307	91784562	chr9:91784307_91784562	9120	SHC3	Intron	1.64102	5.24144	11.39	0.000738404	0.078517
peak_55733	chr5	47625135	47625550	chr5:47625135_47625550	-1928915	HCN1	Distal Intergenic	1.80286	5.07447	11.3776	0.000743337	0.0787736
peak_28247	chr17	19533406	19535008	chr17:19533406_19535008	-17056	ALDH3A2	Distal Intergenic	1.95875	4.55172	11.3624	0.000749472	0.0791554
peak_74997	chrX	39777657	39777946	chrX:39777657_39777946	258636	BCOR	Distal Intergenic	-1.82369	2.54671	11.3452	0.000756422	0.0796204
peak_70445	chr8	141318065	141318419	chr8:141318065_141318419	150259	TRAPPC9	Intron	1.69933	2.60018	11.3283	0.000763367	0.079814
peak_70990	chr9	14992179	14994619	chr9:14992179_14994619	0	LOC389705	Promoter	2.01477	3.98952	11.3324	0.000761661	0.079814
peak_38340	chr2	68156875	68158358	chr2:68156875_68158358	131801	C1D	Distal Intergenic	1.76105	3.15783	11.3168	0.000768095	0.0800406
peak_64233	chr7	1235992	1236526	chr7:1235992_1236526	-36128	UNCX	Distal Intergenic	2.0302	3.88069	11.2929	0.000778048	0.0808084
peak_8169	chr10	22332958	22333739	chr10:22332958_22333739	-40308	DNAJC1	Distal Intergenic	1.89382	2.82754	11.2832	0.000782105	0.0809609
peak_68875	chr8	41945004	41945344	chr8:41945004_41945344	-35499	KAT6A	Distal Intergenic	-1.67673	3.0378	11.2257	0.000806721	0.0832334
peak_28772	chr17	35486860	35488632	chr17:35486860_35488632	95818	MIR2909	5' UTR	1.13361	2.61785	11.2074	0.000814708	0.083781
peak_65624	chr7	59282505	59282765	chr7:59282505_59282765	1772622	ZNF716	Distal Intergenic	-0.912128	4.84056	11.1883	0.000823165	0.0843731
peak_60596	chr6	42309854	42310165	chr6:42309854_42310165	109700	TRERF1	Intron	-1.05222	3.53528	11.1568	0.000837227	0.0852553
peak_13702	chr11	117180971	117181526	chr11:117180971_117181526	5446	BACE1	Intron	-1.18304	2.97761	11.1616	0.000835086	0.0852553
peak_4467	chr1	143424633	143425048	chr1:143424633_143425048	-262082	NA	Exon	1.47516	2.39478	11.1406	0.000844604	0.0857273
peak_43311	chr20	26751322	26752119	chr20:26751322_26752119	-561453	MIR663AHG	Distal Intergenic	1.79635	3.74183	11.1302	0.000849356	0.0859306
peak_65134	chr7	38908545	38909595	chr7:38908545_38909595	39205	VPS41	Exon	2.12354	4.23185	11.1143	0.000856665	0.0863906
peak_73668	chr9	130053306	130054551	chr9:130053306_130054551	27365	GARNL3	Exon	-2.89618	2.47236	11.105	0.000860944	0.0865429
peak_5405	chr1	162036702	162037453	chr1:162036702_162037453	-2128	NOS1AP	Promoter	2.46521	2.09638	11.0746	0.000875164	0.0876903
peak_24009	chr15	74695454	74696709	chr15:74695454_74696709	29590	SEMA7A	Distal Intergenic	1.52882	2.5974	11.0686	0.00087801	0.0876944
peak_70580	chr8	143973177	143973990	chr8:143973177_143973990	-11941	CYP11B1	Distal Intergenic	-0.728754	5.3008	11.0441	0.00088972	0.088581
peak_17861	chr12	122097882	122098687	chr12:122097882_122098687	11850	MORN3	Intron	1.66275	5.05769	11.0232	0.000899798	0.0893
peak_48516	chr3	30604262	30604761	chr3:30604262_30604761	-43233	TGFBR2	Distal Intergenic	2.44603	2.12019	10.9958	0.000913204	0.0903436
peak_62018	chr6	130322490	130323293	chr6:130322490_130323293	-16435	L3MBTL3	Distal Intergenic	1.3298	2.13532	10.9719	0.000925038	0.0909388
peak_30168	chr17	68383632	68384232	chr17:68383632_68384232	-218089	KCNJ2-AS1	Distal Intergenic	1.67155	4.84349	10.9741	0.000923948	0.0909388
peak_13664	chr11	115503910	115505083	chr11:115503910_115505083	126262	LINC00900	Distal Intergenic	1.606	2.10663	10.9398	0.000941202	0.0910425
peak_18637	chr13	31044050	31045009	chr13:31044050_31045009	-96014	LINC00426	Intron	1.48599	5.74014	10.9181	0.000952303	0.0910425
peak_27789	chr17	6755738	6757388	chr17:6755738_6757388	0	ALOX12P2	Promoter	1.62542	2.61409	10.9308	0.000945774	0.0910425
peak_38659	chr2	84716756	84718272	chr2:84716756_84718272	-25307	DNAH6	Distal Intergenic	1.72148	2.29062	10.9216	0.000950517	0.0910425
peak_55214	chr5	14801921	14802162	chr5:14801921_14802162	23959	MIR4637	Intron	1.55706	2.11169	10.926	0.000948235	0.0910425
peak_58198	chr5	140720089	140720648	chr5:140720089_140720648	1735	PCDHGA2	Exon	1.65554	2.96796	10.941	0.000940608	0.0910425
peak_70472	chr8	142447448	142447944	chr8:142447448_142447944	15441	PTP4A3	Intron	-1.53071	2.91096	10.9372	0.000942515	0.0910425
peak_72958	chr9	99235735	99236286	chr9:99235735_99236286	23321	HABP4	Intron	-0.740286	4.18942	10.9374	0.000942443	0.0910425
peak_73697	chr9	131149539	131150240	chr9:131149539_131150240	-4660	MIR219B	3' UTR	1.87053	2.75027	10.9471	0.000937513	0.0910425
peak_8615	chr10	40141675	40142300	chr10:40141675_40142300	1151948	ACTR3BP5	Distal Intergenic	1.84022	2.69818	10.8906	0.000966555	0.0921233
peak_32875	chr19	3042577	3042873	chr19:3042577_3042873	4760	TLE2	Intron	2.30315	3.64853	10.8277	0.000999945	0.0950161
peak_54099	chr4	113564865	113565478	chr4:113564865_113565478	4235	MIR302B	Intron	1.46571	2.62348	10.8012	0.00101432	0.0960903
peak_62494	chr6	146784934	146785489	chr6:146784934_146785489	-79339	RAB32	Distal Intergenic	1.97479	2.30471	10.7903	0.00102033	0.0961114
peak_75913	chrX	118345424	118347948	chrX:118345424_118347948	-22263	PGRMC1	Distal Intergenic	0.551833	5.63026	10.7896	0.0010207	0.0961114
peak_26129	chr16	31956223	31956493	chr16:31956223_31956493	71144	ZNF267	Distal Intergenic	1.63428	5.35857	10.7708	0.00103114	0.0965132
peak_35798	chr19	45974675	45974942	chr19:45974675_45974942	3422	FOSB	3' UTR	1.82572	2.09707	10.7739	0.00102944	0.0965132
peak_64892	chr7	28128772	28128993	chr7:28128772_28128993	-91083	JAZF1-AS1	Intron	-0.996096	3.84037	10.7632	0.00103537	0.0966198
peak_31283	chr18	2997954	2999572	chr18:2997954_2999572	12373	LPIN2	Intron	1.24832	2.24119	10.7476	0.00104412	0.0969254
peak_56734	chr5	59188395	59189039	chr5:59188395_59189039	-594501	PART1	Exon	1.33553	2.41384	10.7464	0.00104484	0.0969254
peak_24656	chr15	98421280	98422232	chr15:98421280_98422232	-3621	LINC00923	Distal Intergenic	1.6164	4.33363	10.7116	0.00106466	0.098472
peak_8360	chr10	29635686	29636458	chr10:29635686_29636458	57696	LYZL1	Distal Intergenic	1.99584	3.36258	10.7037	0.00106919	0.0985985
peak_68015	chr8	90563	90960	chr8:90563_90960	26064	OR4F21	Distal Intergenic	2.71432	2.64782	10.6899	0.00107722	0.0986429
peak_17454	chr12	109097580	109098886	chr12:109097580_109098886	26440	CORO1C	Intron	2.05	4.48513	10.6929	0.00107548	0.0986429
peak_39879	chr2	112480687	112483103	chr2:112480687_112483103	158638	ANAPC1	Distal Intergenic	1.91113	2.64697	10.6866	0.00107913	0.0986429
peak_23496	chr15	60551218	60552135	chr15:60551218_60552135	138050	ANXA2	Distal Intergenic	2.27745	3.76839	10.6702	0.00108874	0.0986556
peak_41281	chr2	191061343	191062245	chr2:191061343_191062245	58857	C2orf88	Intron	2.39499	2.23485	10.677	0.00108474	0.0986556
peak_47443	chr22	42719922	42720674	chr22:42719922_42720674	54163	OGFRP1	Distal Intergenic	1.83756	2.6576	10.6731	0.00108705	0.0986556
peak_60132	chr6	31157989	31158924	chr6:31157989_31158924	1398689	HLA-DRB5	Distal Intergenic	2.42175	2.30717	10.66	0.00109477	0.0989151
peak_67753	chr7	155296637	155299882	chr7:155296637_155299882	26657	CNPY1	Exon	1.39598	3.06765	10.6331	0.00111079	0.0998727
peak_70192	chr8	127207940	127208480	chr8:127207940_127208480	-244499	LINC00861	Distal Intergenic	1.34436	2.92255	10.6262	0.00111495	0.0998727
peak_48969	chr3	45599543	45600078	chr3:45599543_45600078	-36245	LIMD1	Distal Intergenic	1.19993	3.14034	10.6313	0.00111187	0.0998727
peak_43366	chr20	27085905	27086251	chr20:27085905_27086251	-896036	MIR663AHG	Distal Intergenic	1.97585	3.48222	10.6112	0.00112403	0.100112
peak_51337	chr3	160311666	160312482	chr3:160311666_160312482	-28290	KPNA4	Distal Intergenic	2.51477	2.89833	10.6139	0.00112238	0.100112
peak_56627	chr5	56316223	56316950	chr5:56316223_56316950	-48721	MIER3	Distal Intergenic	2.02533	2.84441	10.5803	0.00114298	0.101511
peak_71321	chr9	35616750	35617545	chr9:35616750_35617545	8659	MIR4667	5' UTR	1.08683	4.46465	10.5615	0.0011547	0.101972
peak_52199	chr4	244600	244885	chr4:244600_244885	38211	ZNF876P	Intron	1.41715	2.46605	10.5663	0.00115167	0.101972
peak_4021	chr1	123672226	123673919	chr1:123672226_123673919	2411316	EMBP1	Distal Intergenic	1.5322	3.92135	10.5242	0.00117824	0.102826
peak_24742	chr15	100580298	100581046	chr15:100580298_100581046	-233166	DNM1P46	Intron	1.80036	4.31238	10.5396	0.00116842	0.102826
peak_54112	chr4	113760244	113763203	chr4:113760244_113763203	21005	ANK2	Intron	1.32358	2.10041	10.524	0.00117833	0.102826
peak_55806	chr5	47842598	47842835	chr5:47842598_47842835	1894399	EMB	Distal Intergenic	1.55591	2.47233	10.5344	0.00117173	0.102826
peak_75720	chrX	82741992	82742309	chrX:82741992_82742309	-20960	POU3F4	Distal Intergenic	1.57913	4.62969	10.5201	0.00118081	0.102826
peak_15354	chr12	35268809	35270052	chr12:35268809_35270052	1093593	ALG10	Distal Intergenic	1.57446	3.35345	10.4922	0.00119879	0.103527
peak_21305	chr14	73775847	73776091	chr14:73775847_73776091	71642	PAPLN	Intron	-1.03438	2.34139	10.5004	0.00119346	0.103527
peak_55289	chr5	26476247	26476593	chr5:26476247_26476593	562096	CDH9	Distal Intergenic	1.32493	3.02696	10.4936	0.00119791	0.103527
peak_26906	chr16	79640514	79641311	chr16:79640514_79641311	-5892	MAF	Distal Intergenic	2.04937	2.34798	10.4698	0.00121343	0.104502
peak_58561	chr5	157252641	157253849	chr5:157252641_157253849	32334	CLINT1	Intron	1.45413	2.61846	10.4562	0.00122241	0.104987
peak_33867	chr19	17541138	17541417	chr19:17541138_17541417	10226	MVB12A	Distal Intergenic	1.81689	4.07022	10.444	0.00123049	0.10539
peak_72607	chr9	88923793	88924161	chr9:88923793_88924161	-26303	ISCA1	Exon	-0.546853	5.51417	10.4386	0.00123409	0.10541
peak_66354	chr7	95511837	95512136	chr7:95511837_95512136	110019	DYNC1I1	Intron	1.81127	2.24611	10.4128	0.00125144	0.106131
peak_68158	chr8	8165608	8166280	chr8:8165608_8166280	72977	PRAG1	Distal Intergenic	1.4964	3.13926	10.4161	0.00124922	0.106131
peak_73843	chr9	133682589	133684796	chr9:133682589_133684796	84429	QRFP	Intron	1.52002	5.12746	10.4059	0.0012561	0.106131
peak_4537	chr1	145232326	145234193	chr1:145232326_145234193	23215	NOTCH2NLA	Intron	1.64236	2.72558	10.4096	0.00125362	0.106131
peak_45873	chr21	44154829	44156262	chr21:44154829_44156262	80967	PDE9A	Intron	1.33066	2.14305	10.3899	0.00126708	0.106769
peak_25702	chr16	22318471	22319000	chr16:22318471_22319000	9775	POLR3E	Intron	1.98924	2.70874	10.3825	0.00127215	0.106909
peak_64801	chr7	25557573	25558027	chr7:25557573_25558027	-289468	NPVF	Distal Intergenic	2.39874	2.70004	10.3322	0.0013073	0.109568
peak_44663	chr20	58907651	58908456	chr20:58907651_58908456	-144713	MIR4533	Intron	-0.959952	3.03413	10.2852	0.00134098	0.11209
peak_39649	chr2	105744252	105747029	chr2:105744252_105747029	89769	MRPS9	Distal Intergenic	0.960053	3.29631	10.2772	0.00134685	0.112281
peak_59890	chr6	25410211	25410762	chr6:25410211_25410762	130905	CARMIL1	Intron	1.91248	2.55416	10.2672	0.00135414	0.112588
peak_26201	chr16	38265969	38267269	chr16:38265969_38267269	3285046	LINC02167	Distal Intergenic	1.99916	5.64481	10.2539	0.00136398	0.113106
peak_8183	chr10	22597186	22597447	chr10:22597186_22597447	-7865	COMMD3-BMI1	Distal Intergenic	1.59987	2.56762	10.2375	0.00137615	0.113152
peak_37428	chr2	25990989	25992153	chr2:25990989_25992153	-94473	DTNB	5' UTR	1.14954	3.26409	10.2389	0.00137507	0.113152
peak_39492	chr2	100554571	100555408	chr2:100554571_100555408	203629	AFF3	Intron	1.73999	6.0838	10.2453	0.00137036	0.113152
peak_39535	chr2	101327870	101329405	chr2:101327870_101329405	-107208	NPAS2	Distal Intergenic	1.8007	2.97241	10.2337	0.00137901	0.113152
peak_32842	chr19	2622500	2622877	chr19:2622500_2622877	79869	GNG7	Intron	2.0445	2.31098	10.2237	0.00138649	0.113467
peak_24596	chr15	92831149	92833555	chr15:92831149_92833555	-103585	ST8SIA2	Distal Intergenic	1.3758	2.31787	10.1634	0.00143259	0.116933
peak_75021	chrX	40126998	40127557	chrX:40126998_40127557	-90416	BCOR	Distal Intergenic	-0.788079	4.97437	10.1377	0.00145266	0.118263
peak_51795	chr3	187679599	187680027	chr3:187679599_187680027	-191636	LPP	Distal Intergenic	1.16318	2.45151	10.118	0.00146831	0.118918
peak_58543	chr5	157180179	157181284	chr5:157180179_157181284	9424	LSM11	Exon	-1.42191	3.50378	10.1188	0.00146768	0.118918
peak_46382	chr22	19106277	19106828	chr22:19106277_19106828	3139	DGCR2	Intron	1.91967	2.23337	10.0924	0.00148879	0.120265
peak_38463	chr2	70473190	70473766	chr2:70473190_70473766	2013	TIA1	Intron	1.91655	2.60478	10.0842	0.00149544	0.120491
peak_9973	chr10	95832252	95832771	chr10:95832252_95832771	78506	PLCE1	Intron	1.76307	2.54156	10.0495	0.00152389	0.122467
peak_52010	chr3	195900489	195900953	chr3:195900489_195900953	30982	LINC00885	Distal Intergenic	1.32152	2.37951	10.0405	0.00153138	0.122754
peak_25726	chr16	23182252	23183264	chr16:23182252_23183264	-10776	SCNN1G	Distal Intergenic	-1.89189	3.36707	10.021	0.00154763	0.123739
peak_35832	chr19	46614102	46614603	chr19:46614102_46614603	13328	IGFL3	Distal Intergenic	1.72761	5.53712	10.0156	0.00155216	0.123785
peak_47396	chr22	41919320	41920518	chr22:41919320_41920518	19961	POLR3H	Exon	2.64197	2.21605	9.99688	0.00156806	0.124734
peak_64261	chr7	1742078	1742473	chr7:1742078_1742473	-6325	ELFN1	Distal Intergenic	-0.401561	6.10727	9.98535	0.0015779	0.12505
peak_44704	chr20	60409640	60410194	chr20:60409640_60410194	118524	MIR1257	Intron	2.04295	4.12814	9.98288	0.00158003	0.12505
peak_17674	chr12	116880813	116881456	chr12:116880813_116881456	-14690	MIR4472-2	Distal Intergenic	1.62696	5.19126	9.97482	0.00158696	0.125282
peak_33204	chr19	7799710	7800218	chr19:7799710_7800218	-2653	CLEC4G	Distal Intergenic	1.85938	3.14887	9.96452	0.00159586	0.125667
peak_59034	chr5	180315669	180316252	chr5:180315669_180316252	-9825	BTNL8	Distal Intergenic	1.47324	2.84482	9.94153	0.00161591	0.126926
peak_51207	chr3	152384401	152384829	chr3:152384401_152384829	-167907	P2RY1	Distal Intergenic	2.47091	2.9471	9.92181	0.00163331	0.127972
peak_21388	chr14	75435622	75435830	chr14:75435622_75435830	-13155	PGF	Distal Intergenic	1.61481	2.62271	9.90601	0.00164739	0.128556
peak_50843	chr3	133412688	133413105	chr3:133412688_133413105	-6106	TF	Distal Intergenic	1.48606	2.90684	9.90423	0.00164899	0.128556
peak_13801	chr11	118912032	118913141	chr11:118912032_118913141	-10416	SLC37A4	Downstream	-0.885463	3.64025	9.8962	0.00165621	0.128585
peak_66973	chr7	127415383	127415762	chr7:127415383_127415762	123181	SND1	Intron	1.93875	3.66968	9.89108	0.00166082	0.128585
peak_67402	chr7	142362330	142362820	chr7:142362330_142362820	-11311	MTRNR2L6	Intron	-1.7669	2.80059	9.88555	0.00166582	0.128585
peak_73081	chr9	109244477	109244887	chr9:109244477_109244887	-380491	ZNF462	Intron	2.10178	2.60284	9.88703	0.00166448	0.128585
peak_43596	chr20	28523333	28523732	chr20:28523333_28523732	-1088147	FRG1BP	Distal Intergenic	1.05724	2.48272	9.86597	0.00168364	0.12964
peak_35837	chr19	46622133	46622344	chr19:46622133_46622344	5587	IGFL3	Downstream	0.777487	4.31195	9.81453	0.00173139	0.132107
peak_43006	chr20	6321215	6321734	chr20:6321215_6321734	-217024	FERMT1	Distal Intergenic	1.54079	2.17033	9.81777	0.00172834	0.132107
peak_47550	chr22	46116266	46117076	chr22:46116266_46117076	-39328	MIR4762	Intron	1.43265	2.19584	9.81326	0.00173258	0.132107
peak_62686	chr6	154605309	154605529	chr6:154605309_154605529	226224	CNKSR3	Intron	1.73184	2.31338	9.81774	0.00172836	0.132107
peak_69958	chr8	116873728	116875280	chr8:116873728_116875280	-192500	TRPS1	Distal Intergenic	3.49913	2.40017	9.79782	0.00174718	0.132897
peak_54830	chr4	181239226	181241695	chr4:181239226_181241695	838607	LINC00290	Distal Intergenic	1.56845	2.58548	9.76406	0.00177957	0.135031
peak_56342	chr5	49304394	49307139	chr5:49304394_49307139	430095	EMB	Distal Intergenic	1.32566	2.6717	9.739	0.00180399	0.136553
peak_39841	chr2	111442567	111443634	chr2:111442567_111443634	-6883	BUB1	Distal Intergenic	2.11439	5.65035	9.69682	0.00184588	0.139386
peak_16136	chr12	52156714	52157135	chr12:52156714_52157135	68566	FIGNL2	Intron	1.6999	4.90646	9.67847	0.0018644	0.140445
peak_23720	chr15	65828183	65829467	chr15:65828183_65829467	5356	HACD3	Intron	1.00234	2.54964	9.66098	0.00188223	0.141108
peak_71884	chr9	44318172	44318531	chr9:44318172_44318531	633287	CNTNAP3B	Distal Intergenic	-0.735075	5.32365	9.66311	0.00188005	0.141108
peak_54424	chr4	143882995	143883292	chr4:143882995_143883292	-115391	INPP4B	Distal Intergenic	1.93205	4.63913	9.63799	0.00190593	0.142544
peak_69428	chr8	80864462	80865438	chr8:80864462_80865438	77068	MRPS28	Intron	1.24982	4.00213	9.62836	0.00191596	0.142951
peak_33789	chr19	16366020	16367551	chr19:16366020_16367551	57355	AP1M1	Distal Intergenic	1.78372	2.10764	9.62304	0.00192151	0.143025
peak_6516	chr1	207286298	207286604	chr1:207286298_207286604	8691	C4BPA	5' UTR	1.96818	2.3518	9.60061	0.00194513	0.144386
peak_31229	chr18	976277	976785	chr18:976277_976785	71333	ADCYAP1	Distal Intergenic	1.31815	2.21687	9.59257	0.00195366	0.144386
peak_42894	chr20	3744729	3745563	chr20:3744729_3745563	3472	C20orf27	Intron	1.15575	2.15621	9.59649	0.0019495	0.144386
peak_38885	chr2	88903865	88904148	chr2:88903865_88904148	22946	EIF2AK3	Intron	2.07393	5.60524	9.58241	0.0019645	0.1446
peak_52378	chr4	3196609	3197083	chr4:3196609_3197083	-53684	MSANTD1	Intron	1.78107	3.68627	9.5794	0.00196773	0.1446
peak_54685	chr4	165112036	165113635	chr4:165112036_165113635	5228	ANP32C	Intron	1.88302	2.90615	9.57688	0.00197043	0.1446
peak_37104	chr2	9620173	9620414	chr2:9620173_9620414	5503	IAH1	Intron	1.22585	2.99939	9.53642	0.00201435	0.147386
peak_45184	chr21	12879563	12879823	chr21:12879563_12879823	-1530664	ANKRD30BP2	Distal Intergenic	1.16378	3.37111	9.53326	0.00201782	0.147386
peak_31261	chr18	2856389	2856884	chr18:2856389_2856884	9361	EMILIN2	Intron	1.73123	5.9182	9.51302	0.00204019	0.148588
peak_36398	chr19	56066300	56067087	chr19:56066300_56067087	-9391	SBK3	Distal Intergenic	1.84494	2.49904	9.50979	0.00204378	0.148588
peak_45268	chr21	17787191	17787660	chr21:17787191_17787660	-123749	MIR99A	Intron	1.70477	2.37366	9.49917	0.00205565	0.149104
peak_72065	chr9	45013959	45014360	chr9:45013959_45014360	23723	FAM27C	Distal Intergenic	-1.35767	2.4363	9.49134	0.00206444	0.149395
peak_26012	chr16	30143164	30143476	chr16:30143164_30143476	-8534	MAPK3	Intron	2.18355	2.93418	9.48575	0.00207074	0.149505
peak_67714	chr7	151992297	151993116	chr7:151992297_151993116	139974	KMT2C	Intron	0.509654	6.09341	9.48109	0.00207601	0.14954
peak_50774	chr3	129160124	129162267	chr3:129160124_129162267	-1102	MBD4	Promoter	2.37747	2.66461	9.47523	0.00208265	0.149673
peak_34691	chr19	26365327	26365932	chr19:26365327_26365932	1918916	LINC00662	Distal Intergenic	1.57144	2.89665	9.46417	0.00209524	0.149889
peak_71818	chr9	44132632	44133600	chr9:44132632_44133600	447747	CNTNAP3B	Distal Intergenic	1.68135	2.85686	9.46454	0.00209482	0.149889
peak_60621	chr6	42745362	42747925	chr6:42745362_42747925	-1865	BICRAL	Promoter	1.48563	3.66228	9.44665	0.00211535	0.150982
peak_52770	chr4	32216669	32216898	chr4:32216669_32216898	1494639	PCDH7	Distal Intergenic	1.30705	2.14194	9.43966	0.00212343	0.151214
peak_35385	chr19	39247033	39247966	chr19:39247033_39247966	-11919	CAPN12	Distal Intergenic	1.41106	3.05284	9.43501	0.00212882	0.151253
peak_12196	chr11	57646865	57647129	chr11:57646865_57647129	126150	CTNND1	Distal Intergenic	1.89969	3.42757	9.37876	0.00219514	0.153867
peak_18863	chr13	41454105	41454683	chr13:41454105_41454683	41227	TPTE2P5	Intron	1.77161	2.14481	9.38073	0.00219278	0.153867
peak_38123	chr2	57720746	57721251	chr2:57720746_57721251	-413535	VRK2	Distal Intergenic	1.57833	5.12423	9.39317	0.00217795	0.153867
peak_42589	chr2	239303310	239304029	chr2:239303310_239304029	-31597	ASB1	Intron	1.00512	2.39866	9.38649	0.00218591	0.153867
peak_59427	chr6	7106659	7109985	chr6:7106659_7109985	0	RREB1	Promoter	1.56495	2.41867	9.38762	0.00218456	0.153867
peak_72057	chr9	44983165	44984216	chr9:44983165_44984216	-6020	FAM27C	Distal Intergenic	2.14533	3.85613	9.39002	0.0021817	0.153867
peak_68621	chr8	27490811	27492034	chr8:27490811_27492034	0	SCARA3	Promoter	1.63983	2.4529	9.36849	0.00220747	0.154385
peak_18612	chr13	30422075	30422948	chr13:30422075_30422948	1872	UBL3	Intron	1.92886	3.36579	9.34933	0.00223067	0.155659
peak_38337	chr2	68064041	68064260	chr2:68064041_68064260	225899	C1D	Distal Intergenic	1.51261	2.52884	9.31293	0.00227542	0.158387
peak_66237	chr7	87028606	87029076	chr7:87028606_87029076	53655	CROT	3' UTR	-0.431478	6.39857	9.30933	0.0022799	0.158387
peak_19304	chr13	73952579	73953143	chr13:73952579_73953143	323465	KLF5	Distal Intergenic	1.9289	4.49214	9.28388	0.00231179	0.160247
peak_3501	chr1	120388396	120389680	chr1:120388396_120389680	-893	NBPF7	Promoter	1.84397	2.70254	9.26814	0.00233175	0.161272
peak_56846	chr5	67160942	67161259	chr5:67160942_67161259	-350325	PIK3R1	Distal Intergenic	1.13749	2.71675	9.25905	0.00234335	0.161717
peak_13366	chr11	96105120	96106231	chr11:96105120_96106231	16852	CCDC82	Intron	1.51539	2.45668	9.25383	0.00235003	0.161821
peak_35881	chr19	47156899	47159888	chr19:47156899_47159888	-3733	DACT3-AS1	Intron	1.7197	3.22819	9.24588	0.00236026	0.162168
peak_12239	chr11	59158191	59158938	chr11:59158191_59158938	26259	OR5AN1	Distal Intergenic	1.43809	3.11515	9.2051	0.00241341	0.164734
peak_17875	chr12	122244073	122245496	chr12:122244073_122245496	1435	SETD1B	Intron	1.89792	3.23576	9.21231	0.00240393	0.164734
peak_46546	chr22	21540308	21540648	chr22:21540308_21540648	83003	BCRP2	Exon	0.823703	4.34484	9.20572	0.00241261	0.164734
peak_68667	chr8	28880961	28881657	chr8:28880961_28881657	133050	HMBOX1	Intron	1.67571	3.10138	9.16138	0.00247176	0.168349
peak_12331	chr11	61638343	61638954	chr11:61638343_61638954	20052	FADS3	Downstream	2.11889	2.59099	9.15192	0.00248458	0.168795
peak_52264	chr4	1309153	1310233	chr4:1309153_1310233	25481	MAEA	5' UTR	1.49711	2.17571	9.14858	0.00248911	0.168795
peak_53317	chr4	70735884	70736212	chr4:70735884_70736212	-10014	SULT1E1	Distal Intergenic	1.28134	3.43367	9.11064	0.00254127	0.171959
peak_4059	chr1	123773924	123774309	chr1:123773924_123774309	2513014	EMBP1	Distal Intergenic	1.61457	2.91217	9.103	0.0025519	0.172066
peak_37465	chr2	26847795	26849991	chr2:26847795_26849991	14220	CIB4	Intron	1.04917	2.53828	9.09887	0.00255767	0.172066
peak_42820	chr20	1764329	1765004	chr20:1764329_1765004	-3937	LOC100289473	Distal Intergenic	1.99803	3.73299	9.09767	0.00255936	0.172066
peak_11301	chr11	10508893	10509991	chr11:10508893_10509991	20732	MTRNR2L8	Exon	2.08449	2.94431	9.07777	0.00258735	0.172858
peak_34743	chr19	26498219	26498461	chr19:26498219_26498461	1786387	LINC00662	Distal Intergenic	1.97867	3.37953	9.06848	0.00260053	0.172858
peak_42643	chr2	240622830	240623748	chr2:240622830_240623748	-60806	LOC150935	Distal Intergenic	1.82891	2.25644	9.06537	0.00260496	0.172858
peak_45459	chr21	33293397	33294342	chr21:33293397_33294342	47769	HUNK	Intron	1.38673	2.71825	9.06194	0.00260985	0.172858
peak_56557	chr5	55314683	55314958	chr5:55314683_55314958	23688	FLJ31104	Distal Intergenic	0.917752	3.45882	9.0761	0.00258971	0.172858
peak_7001	chr1	227953998	227954323	chr1:227953998_227954323	-30886	JMJD4	Intron	-1.47231	2.75117	9.0703	0.00259794	0.172858
peak_59304	chr6	3156301	3158072	chr6:3156301_3158072	0	TUBB2A	Promoter	1.31019	2.66081	9.08471	0.00257756	0.172858
peak_22628	chr15	19594593	19594800	chr15:19594593_19594800	-893197	CHEK2P2	Distal Intergenic	1.66633	4.70372	9.05139	0.00262495	0.173491
peak_5217	chr1	159011177	159011379	chr1:159011177_159011379	35268	AIM2	Intron	1.06933	2.29958	9.04189	0.00263863	0.174027
peak_65116	chr7	38344690	38345978	chr7:38344690_38345978	11611	TARP	Intron	-0.332585	7.28222	9.02749	0.0026595	0.175034
peak_8272	chr10	26603908	26604858	chr10:26603908_26604858	98672	GAD2	Distal Intergenic	1.59983	2.79302	9.01542	0.00267711	0.175823
peak_16643	chr12	66964145	66965277	chr12:66964145_66965277	232617	GRIP1	5' UTR	1.63185	5.92501	9.01122	0.00268327	0.175858
peak_45135	chr21	12356805	12357058	chr21:12356805_12357058	-1257868	BAGE3	Distal Intergenic	2.1613	2.13866	8.9739	0.00273864	0.179112
peak_54173	chr4	121050291	121050527	chr4:121050291_121050527	-62278	MAD2L1	Distal Intergenic	1.41101	3.42124	8.95608	0.00276548	0.18049
peak_17965	chr12	123905469	123905671	chr12:123905469_123905671	15593	RILPL2	Intron	1.73194	3.96072	8.91843	0.00282307	0.183482
peak_55238	chr5	16626514	16627577	chr5:16626514_16627577	-9347	RETREG1	Distal Intergenic	1.63335	2.7389	8.92136	0.00281855	0.183482
peak_61707	chr6	111781190	111781683	chr6:111781190_111781683	-22992	TRAF3IP2-AS1	5' UTR	1.02225	2.60731	8.90513	0.00284371	0.18444
peak_56189	chr5	48897454	48897948	chr5:48897454_48897948	839286	EMB	Distal Intergenic	-0.41876	8.35693	8.87725	0.00288746	0.18689
peak_18049	chr12	130161434	130163290	chr12:130161434_130163290	224922	TMEM132D	Intron	2.48454	3.58072	8.83994	0.00294709	0.189963
peak_75817	chrX	104111867	104113714	chrX:104111867_104113714	300871	IL1RAPL2	Intron	0.585908	5.29045	8.84033	0.00294645	0.189963
peak_61668	chr6	111210062	111210618	chr6:111210062_111210618	-69145	GTF3C6	5' UTR	1.54974	2.72234	8.82972	0.00296363	0.190636
peak_62331	chr6	140427706	140427935	chr6:140427706_140427935	-98454	MIR3668	Distal Intergenic	0.939366	2.50464	8.81594	0.0029861	0.191687
peak_17866	chr12	122111123	122111399	chr12:122111123_122111399	-586	MORN3	Promoter	1.43528	2.17665	8.80513	0.00300385	0.192431
peak_28313	chr17	21283835	21285660	chr17:21283835_21285660	4136	KCNJ12	Intron	1.70479	4.05844	8.7989	0.00301413	0.192694
peak_75416	chrX	57821851	57822139	chrX:57821851_57822139	114928	ZXDA	Distal Intergenic	2.31262	2.81675	8.79384	0.0030225	0.192835
peak_9229	chr10	61452288	61453179	chr10:61452288_61453179	16470	SLC16A9	Intron	1.92943	4.51328	8.78703	0.0030338	0.192855
peak_41766	chr2	205925594	205926178	chr2:205925594_205926178	515078	PARD3B	Intron	2.17563	2.71663	8.78622	0.00303515	0.192855
peak_52389	chr4	3399757	3400105	chr4:3399757_3400105	-43621	HGFAC	Intron	1.12722	3.55244	8.77759	0.00304953	0.193376
peak_31728	chr18	22232062	22232777	chr18:22232062_22232777	23916	LINC01915	Intron	1.76337	5.29312	8.75868	0.00308132	0.194996
peak_34560	chr19	26013514	26013980	chr19:26013514_26013980	-1667265	HAVCR1P1	Distal Intergenic	1.51716	2.21451	8.75491	0.0030877	0.195006
peak_71689	chr9	43791076	43791901	chr9:43791076_43791901	106191	CNTNAP3B	Intron	1.21335	3.27662	8.74529	0.00310403	0.195642
peak_72301	chr9	68318097	68318989	chr9:68318097_68318989	135386	FRG1JP	Distal Intergenic	1.77698	5.57272	8.72659	0.00313603	0.197261
peak_68023	chr8	282274	282681	chr8:282274_282681	-74127	FBXO25	Distal Intergenic	1.80286	2.15599	8.65726	0.00325761	0.203272
peak_19122	chr13	50127153	50127598	chr13:50127153_50127598	32121	RCBTB1	Intron	1.65017	4.03371	8.66024	0.00325228	0.203272
peak_23502	chr15	60573710	60574603	chr15:60573710_60574603	115582	ANXA2	Distal Intergenic	1.01219	2.49169	8.66078	0.00325132	0.203272
peak_57125	chr5	80210621	80211758	chr5:80210621_80211758	-44750	RASGRF2	Distal Intergenic	0.750626	4.0217	8.66036	0.00325208	0.203272
peak_41560	chr2	200585595	200586644	chr2:200585595_200586644	129252	FTCDNL1	Distal Intergenic	2.03041	2.32752	8.64624	0.00327737	0.204098
peak_75498	chrX	68686334	68686796	chrX:68686334_68686796	-38282	FAM155B	Distal Intergenic	1.80164	2.40438	8.62299	0.00331947	0.205086
peak_23003	chr15	40238922	40239326	chr15:40238922_40239326	12575	EIF2AK4	Intron	1.95362	4.88603	8.62367	0.00331824	0.205086
peak_33938	chr19	18284834	18285262	chr19:18284834_18285262	255	IFI30	Intron	1.48486	3.12626	8.6289	0.00330872	0.205086
peak_35564	chr19	41875012	41876163	chr19:41875012_41876163	-4934	B9D2	Intron	1.50734	2.24725	8.62946	0.0033077	0.205086
peak_58336	chr5	146210825	146211033	chr5:146210825_146211033	88036	PPP2R2B-IT1	Intron	1.05945	3.23167	8.59121	0.00337789	0.208283
peak_63047	chr6	167698858	167699961	chr6:167698858_167699961	-4842	UNC93A	Distal Intergenic	-0.492917	5.94024	8.57676	0.00340482	0.20947
peak_67834	chr7	157683678	157684002	chr7:157683678_157684002	36401	LOC100506585	Intron	1.52218	3.06393	8.56706	0.00342299	0.20947
peak_25888	chr16	28688232	28688916	chr16:28688232_28688916	-53325	SULT1A1	Intron	-0.849754	4.48413	8.5719	0.00341391	0.20947
peak_44167	chr20	43728187	43729150	chr20:43728187_43729150	603	KCNS1	5' UTR	1.88925	2.77779	8.56656	0.00342393	0.20947
peak_7129	chr1	230972340	230973394	chr1:230972340_230973394	31941	C1orf198	3' UTR	1.31887	2.45051	8.55554	0.00344472	0.21033
peak_38300	chr2	64819307	64820551	chr2:64819307_64820551	-13895	LINC02579	3' UTR	2.23612	3.81386	8.54835	0.00345835	0.21034
peak_61441	chr6	99456097	99456308	chr6:99456097_99456308	-60248	FBXL4	Distal Intergenic	2.70696	2.2432	8.54942	0.00345632	0.21034
peak_32082	chr18	48996613	48998550	chr18:48996613_48998550	78201	LINC01630	Intron	2.07033	4.38909	8.53741	0.0034792	0.210387
peak_57799	chr5	131256984	131257999	chr5:131256984_131257999	23392	MEIKIN	Exon	1.08281	2.3209	8.53736	0.0034793	0.210387
peak_59758	chr6	20534217	20535259	chr6:20534217_20535259	0	CDKAL1	Promoter	1.45801	2.13169	8.5439	0.00346683	0.210387
peak_50121	chr3	99831736	99832440	chr3:99831736_99832440	909	FILIP1L	Intron	1.4324	2.96455	8.53347	0.00348675	0.21043
peak_21220	chr14	70916831	70918260	chr14:70916831_70918260	-614	ADAM21	Promoter	1.34808	2.28219	8.5292	0.00349492	0.210477
peak_58861	chr5	176365010	176366174	chr5:176365010_176366174	-38677	HK3	Intron	-0.337008	6.31201	8.52605	0.00350099	0.210477
peak_26862	chr16	75494999	75495567	chr16:75494999_75495567	3017	TMEM170A	Intron	1.53315	2.31192	8.52094	0.00351083	0.210663
peak_6975	chr1	226882369	226883305	chr1:226882369_226883305	43571	ITPKB	Intron	1.29733	2.32598	8.50013	0.00355121	0.211867
peak_38349	chr2	68239191	68239419	chr2:68239191_68239419	50740	C1D	Distal Intergenic	1.58766	2.27317	8.50102	0.00354948	0.211867
peak_49396	chr3	57691953	57693526	chr3:57691953_57693526	-13137	DENND6A	Distal Intergenic	2.03238	3.05796	8.50531	0.00354112	0.211867
peak_69560	chr8	86523204	86523836	chr8:86523204_86523836	147073	CA2	Distal Intergenic	2.28896	2.87109	8.48947	0.00357208	0.212705
peak_16252	chr12	54033132	54034732	chr12:54033132_54034732	-12933	ATF7	Distal Intergenic	1.34231	3.06892	8.45843	0.00363356	0.215955
peak_47176	chr22	39040202	39041429	chr22:39040202_39041429	11205	FAM227A	Intron	1.67996	3.47279	8.44954	0.00365136	0.216601
peak_49287	chr3	52446675	52447473	chr3:52446675_52447473	2148	PHF7	5' UTR	1.64419	2.11307	8.43754	0.00367553	0.217622
peak_8598	chr10	40046899	40047796	chr10:40046899_40047796	1057172	ACTR3BP5	Distal Intergenic	1.34328	2.63309	8.4125	0.00372649	0.219393
peak_44234	chr20	44888681	44889165	chr20:44888681_44889165	47972	CDH22	Intron	0.986675	3.66703	8.41821	0.00371482	0.219393
peak_52667	chr4	17576459	17578856	chr4:17576459_17578856	-71	LAP3	Promoter	1.71188	2.25799	8.41396	0.00372351	0.219393
peak_61024	chr6	59703922	59704369	chr6:59703922_59704369	-1416198	GUSBP4	Distal Intergenic	-1.2252	2.89951	8.40071	0.00375075	0.220406
peak_75050	chrX	40749840	40750248	chrX:40749840_40750248	-57391	LOC100132831	Distal Intergenic	1.3658	3.43315	8.37786	0.0037982	0.222776
peak_56517	chr5	54309587	54312258	chr5:54309587_54312258	-7849	GZMK	Distal Intergenic	1.38826	3.72161	8.36556	0.00382398	0.223867
peak_65906	chr7	66212729	66213621	chr7:66212729_66213621	96192	GTF2IRD1P1	Intron	-0.390114	6.06902	8.34837	0.00386034	0.225574
peak_14809	chr12	10668676	10668925	chr12:10668676_10668925	-61461	KLRC1	Distal Intergenic	1.26256	2.10173	8.33669	0.00388522	0.226604
peak_42178	chr2	226650049	226650497	chr2:226650049_226650497	-357013	LOC646736	Distal Intergenic	2.2059	2.6491	8.3332	0.0038927	0.226618
peak_57727	chr5	124747089	124747612	chr5:124747089_124747612	-662589	ZNF608	Distal Intergenic	1.95845	3.16791	8.32563	0.00390897	0.227142
peak_71764	chr9	43975047	43975793	chr9:43975047_43975793	290162	CNTNAP3B	Distal Intergenic	-1.11496	3.3484	8.31592	0.0039299	0.227934
peak_7832	chr10	9060319	9061252	chr10:9060319_9061252	963652	GATA3	Distal Intergenic	1.6786	2.65792	8.30274	0.00395854	0.22917
peak_58732	chr5	170393188	170394342	chr5:170393188_170394342	104292	RANBP17	Intron	0.980802	3.35682	8.26759	0.00403591	0.233217
peak_68695	chr8	29529093	29530789	chr8:29529093_29530789	74836	LINC00589	Distal Intergenic	1.27249	3.05918	8.26388	0.00404415	0.233262
peak_29974	chr17	64602543	64602808	chr17:64602543_64602808	-180382	MIR634	Intron	1.80265	2.17641	8.24222	0.0040927	0.235415
peak_47046	chr22	37176525	37177123	chr22:37176525_37177123	-4348	IFT27	Distal Intergenic	0.886433	2.50375	8.23197	0.00411589	0.235415
peak_60749	chr6	45681679	45682185	chr6:45681679_45682185	-335891	SUPT3H	Distal Intergenic	1.51241	2.13476	8.23627	0.00410615	0.235415
peak_69591	chr8	89836895	89837627	chr8:89836895_89837627	-497178	MMP16	Distal Intergenic	1.23038	2.58144	8.23244	0.00411482	0.235415
peak_74702	chrX	13029126	13031143	chrX:13029126_13031143	31774	FAM9C	Distal Intergenic	1.95372	5.01474	8.23054	0.00411913	0.235415
peak_36164	chr19	50136688	50137366	chr19:50136688_50137366	6034	RRAS	Downstream	1.79316	2.21092	8.21911	0.00414516	0.236095
peak_36229	chr19	51472876	51473232	chr19:51472876_51473232	0	KLK6	Promoter	2.53671	2.22189	8.20551	0.00417633	0.236095
peak_45179	chr21	12810140	12810812	chr21:12810140_12810812	-1599675	ANKRD30BP2	Distal Intergenic	1.08499	2.89425	8.20717	0.00417252	0.236095
peak_56629	chr5	56328775	56329614	chr5:56328775_56329614	-61273	MIER3	Distal Intergenic	-0.562184	4.88519	8.20734	0.00417212	0.236095
peak_69089	chr8	57894205	57894672	chr8:57894205_57894672	11758	IMPAD1	Intron	-1.84215	3.46366	8.21493	0.00415472	0.236095
peak_70003	chr8	120084548	120084770	chr8:120084548_120084770	5124	COLEC10	Intron	-0.806664	4.1588	8.2121	0.00416119	0.236095
peak_58134	chr5	139563633	139563973	chr5:139563633_139563973	8980	CYSTM1	Intron	1.03726	3.84717	8.19697	0.00419605	0.236737
peak_64381	chr7	3559345	3559627	chr7:3559345_3559627	218265	SDK1	Intron	1.17177	3.02298	8.19403	0.00420284	0.236737
peak_10641	chr10	124626758	124627734	chr10:124626758_124627734	11423	FAM24B-CUZD1	Intron	1.79327	2.60673	8.17244	0.00425317	0.239142
peak_50738	chr3	128768246	128768717	chr3:128768246_128768717	-10928	GP9	Distal Intergenic	1.08222	3.18283	8.15945	0.00428374	0.240428
peak_20506	chr14	38129611	38130038	chr14:38129611_38130038	-65286	FOXA1	Intron	1.47243	2.18939	8.13431	0.00434354	0.243347
peak_28869	chr17	38898138	38899797	chr17:38898138_38899797	11787	KRT25	Distal Intergenic	1.74936	2.31683	8.12843	0.00435765	0.243701
peak_32895	chr19	3199001	3199488	chr19:3199001_3199488	13126	NCLN	Intron	1.77249	2.55289	8.12478	0.00436644	0.243756
peak_58248	chr5	142003696	142004193	chr5:142003696_142004193	73442	FGF1	Intron	1.59801	2.28036	8.11872	0.00438105	0.243845
peak_61857	chr6	121055527	121055978	chr6:121055527_121055978	599666	TBC1D32	Distal Intergenic	-0.714234	4.99436	8.11389	0.00439273	0.243845
peak_68840	chr8	38806719	38806928	chr8:38806719_38806928	-24740	HTRA4	Intron	-0.405028	6.2606	8.11122	0.00439922	0.243845
peak_76444	chrX	154096459	154098409	chrX:154096459_154098409	-33522	SMIM9	Intron	1.78614	8.79023	8.11608	0.00438744	0.243845
peak_60388	chr6	36510078	36510643	chr6:36510078_36510643	4604	STK38	Intron	4.26195	2.2394	8.08141	0.00447218	0.245823
peak_65926	chr7	66984080	66984463	chr7:66984080_66984463	216455	STAG3L4	Distal Intergenic	-0.308056	7.29178	8.07104	0.00449782	0.245823
peak_69242	chr8	65951161	65952563	chr8:65951161_65952563	140012	LINC00251	Distal Intergenic	1.49039	3.25027	8.07183	0.00449587	0.245823
peak_70309	chr8	132703540	132703801	chr8:132703540_132703801	-212555	EFR3A	Distal Intergenic	-0.846971	4.10786	8.07822	0.00448004	0.245823
peak_72490	chr9	78200763	78201804	chr9:78200763_78201804	-303756	PCSK5	Intron	1.21066	3.41922	8.07462	0.00448894	0.245823
peak_76148	chrX	131828000	131828392	chrX:131828000_131828392	26330	HS6ST2-AS1	Intron	2.15624	3.16454	8.07441	0.00448948	0.245823
peak_76357	chrX	150736348	150736779	chrX:150736348_150736779	4341	PASD1	Intron	0.878255	2.93888	8.09272	0.00444434	0.245823
peak_23045	chr15	40806673	40808223	chr15:40806673_40808223	16526	MRPL42P5	Distal Intergenic	1.07011	2.12315	8.07599	0.00448555	0.245823
peak_61174	chr6	76477054	76477285	chr6:76477054_76477285	18145	MYO6	Intron	-0.945406	2.61028	8.06506	0.0045127	0.246206
peak_19032	chr13	48078248	48078589	chr13:48078248_48078589	-533114	NUDT15	Distal Intergenic	0.912634	2.55201	8.05507	0.00453764	0.247135
peak_45515	chr21	34613814	34615810	chr21:34613814_34615810	-5204	IL10RB	5' UTR	1.7329	4.06651	8.04934	0.00455201	0.247487
peak_56085	chr5	48614354	48616403	chr5:48614354_48616403	1120831	EMB	Distal Intergenic	1.71028	4.59121	8.04428	0.00456475	0.247749
peak_65052	chr7	36764926	36765979	chr7:36764926_36765979	-772	AOAH	Promoter	1.29381	2.3059	8.03044	0.00459977	0.249217
peak_73744	chr9	131678512	131678845	chr9:131678512_131678845	-4329	PHYHD1	3' UTR	-0.409963	6.6932	8.01554	0.00463776	0.25084
peak_35825	chr19	46537298	46537934	chr19:46537298_46537934	6340	IGFL4	Distal Intergenic	1.00811	2.81096	8.00253	0.0046712	0.251344
peak_40010	chr2	119753269	119753783	chr2:119753269_119753783	53524	MARCO	Distal Intergenic	1.45711	2.79929	8.00316	0.00466957	0.251344
peak_76302	chrX	140918350	140918861	chrX:140918350_140918861	-7241	MAGEC3	Distal Intergenic	-1.80568	3.32095	8.00262	0.00467098	0.251344
peak_43650	chr20	29120243	29120727	chr20:29120243_29120727	-491152	FRG1BP	Distal Intergenic	1.61599	3.05645	7.96765	0.00476208	0.255794
peak_64191	chr7	726202	727393	chr7:726202_727393	-38945	DNAAF5	Intron	-0.404519	6.25136	7.93532	0.0048479	0.259957
peak_60831	chr6	53290494	53291755	chr6:53290494_53291755	-76517	ELOVL5	Distal Intergenic	1.93456	3.40459	7.929	0.00486488	0.260416
peak_45686	chr21	38985548	38985936	chr21:38985548_38985936	245689	DYRK1A	Distal Intergenic	1.05143	4.30943	7.92594	0.00487311	0.260416
peak_41413	chr2	196275471	196277482	chr2:196275471_196277482	-244050	SLC39A10	Distal Intergenic	1.37017	2.891	7.9173	0.00489642	0.260636
peak_65480	chr7	58310220	58311978	chr7:58310220_58311978	800337	ZNF716	Distal Intergenic	0.921859	2.83886	7.92113	0.00488609	0.260636
peak_68200	chr8	9088707	9088975	chr8:9088707_9088975	-79555	PPP1R3B	Distal Intergenic	-0.370962	6.77512	7.91515	0.00490225	0.260636
peak_47039	chr22	37079198	37080571	chr22:37079198_37080571	18119	CACNG2	Intron	1.91409	5.72726	7.90459	0.00493096	0.260832
peak_53110	chr4	50676480	50677489	chr4:50676480_50677489	1688215	CWH43	Distal Intergenic	1.06427	2.17134	7.91054	0.00491475	0.260832
peak_57826	chr5	131382041	131383385	chr5:131382041_131383385	-12962	IL3	Distal Intergenic	1.01723	2.43714	7.90602	0.00492707	0.260832
peak_61101	chr6	70010626	70010976	chr6:70010626_70010976	496073	LMBRD1	Intron	1.19794	2.61983	7.88872	0.0049744	0.260887
peak_44086	chr20	38725391	38726107	chr20:38725391_38726107	591769	MAFB	Distal Intergenic	1.93913	5.86923	7.8916	0.00496649	0.260887
peak_56256	chr5	49073976	49074244	chr5:49073976_49074244	662990	EMB	Distal Intergenic	2.15363	2.75839	7.88818	0.0049759	0.260887
peak_56374	chr5	49376841	49377360	chr5:49376841_49377360	359874	EMB	Distal Intergenic	-0.623736	5.35708	7.90075	0.00494144	0.260887
peak_57890	chr5	132464020	132465392	chr5:132464020_132465392	76358	HSPA4	Distal Intergenic	1.15494	4.21153	7.88594	0.00498207	0.260887
peak_59090	chr5	181449105	181450030	chr5:181449105_181450030	654817	OR4F16	Distal Intergenic	0.967727	4.1301	7.88797	0.00497648	0.260887
peak_48311	chr3	17074493	17074995	chr3:17074493_17074995	99805	MIR3714	Intron	1.49715	2.25174	7.88187	0.00499328	0.261036
peak_52319	chr4	2247940	2248396	chr4:2247940_2248396	3487	MIR4800	Downstream	1.90622	6.18082	7.86723	0.00503386	0.262719
peak_56983	chr5	75091635	75092053	chr5:75091635_75092053	-78322	POC5	Distal Intergenic	2.01634	2.14155	7.85863	0.00505786	0.263093
peak_57548	chr5	111232541	111233366	chr5:111232541_111233366	-14839	NREP-AS1	Intron	-0.364692	6.979	7.86091	0.00505151	0.263093
peak_60162	chr6	31664621	31666251	chr6:31664621_31666251	891362	HLA-DRB5	5' UTR	0.722544	4.17882	7.85325	0.00507295	0.26344
peak_59594	chr6	14066773	14067268	chr6:14066773_14067268	-50219	CD83	Distal Intergenic	1.64855	3.26317	7.84207	0.00510443	0.264634
peak_39950	chr2	113692627	113694201	chr2:113692627_113694201	22079	IL37	Distal Intergenic	1.74502	3.87994	7.83769	0.0051168	0.264837
peak_37514	chr2	27735115	27736348	chr2:27735115_27736348	15409	GCKR	Intron	1.45176	2.10999	7.81857	0.00517122	0.26677
peak_66729	chr7	106126216	106127012	chr7:106126216_106127012	174622	CCDC71L	Distal Intergenic	1.31114	4.11173	7.82155	0.00516269	0.26677
peak_73549	chr9	128370585	128371863	chr9:128370585_128371863	97650	MAPKAP1	Intron	1.846	3.05251	7.80666	0.0052054	0.267211
peak_21613	chr14	91138569	91138835	chr14:91138569_91138835	143926	TTC7B	Intron	1.90637	2.65641	7.80864	0.00519969	0.267211
peak_54789	chr4	174521711	174523539	chr4:174521711_174523539	70102	HAND2-AS1	Distal Intergenic	1.49055	2.47553	7.80707	0.00520423	0.267211
peak_71280	chr9	34589591	34592122	chr9:34589591_34592122	0	CNTFR	Promoter	-0.720298	4.97462	7.80018	0.00522411	0.267731
peak_65231	chr7	44051629	44052277	chr7:44051629_44052277	6471	POLR2J4	Intron	2.50362	2.69166	7.79166	0.0052488	0.268557
peak_13735	chr11	118152623	118153364	chr11:118152623_118153364	-17372	MPZL2	Distal Intergenic	1.77056	2.58873	7.77191	0.00530648	0.271064
peak_61310	chr6	89925671	89925995	chr6:89925671_89925995	15012	GABRR1	Intron	0.584847	4.74472	7.75586	0.00535387	0.272101
peak_70367	chr8	134043420	134044745	chr8:134043420_134044745	70565	SLA	Intron	-0.700399	4.33759	7.75786	0.00534793	0.272101
peak_42571	chr2	239163897	239164894	chr2:239163897_239164894	-15216	HES6	Exon	0.927989	2.39565	7.75325	0.00536159	0.272101
peak_57864	chr5	132007795	132008283	chr5:132007795_132008283	-1395	IL4	Promoter	1.75705	4.77484	7.75523	0.00535573	0.272101
peak_72921	chr9	98107974	98109212	chr9:98107974_98109212	-27983	FANCC	Distal Intergenic	-0.737256	4.32921	7.74763	0.0053783	0.272506
peak_26200	chr16	37851877	37852525	chr16:37851877_37852525	2870954	LINC02167	Distal Intergenic	0.954474	2.3003	7.73917	0.00540357	0.273094
peak_58475	chr5	151577450	151577884	chr5:151577450_151577884	206956	NMUR2	Intron	1.00012	2.13877	7.7379	0.00540736	0.273094
peak_57714	chr5	123430463	123431068	chr5:123430463_123431068	582670	CSNK1G3	Distal Intergenic	1.71787	3.2021	7.73188	0.00542543	0.273564
peak_64197	chr7	831768	833074	chr7:831768_833074	-22120	SUN1	Distal Intergenic	0.916131	2.29599	7.70683	0.00550122	0.276494
peak_58891	chr5	177022181	177023868	chr5:177022181_177023868	2968	TMED9	3' UTR	1.57218	2.67793	7.70713	0.00550031	0.276494
peak_35693	chr19	44723737	44724492	chr19:44723737_44724492	7046	ZNF227	Intron	1.15938	2.20201	7.69231	0.00554565	0.278062
peak_38702	chr2	85300424	85300831	chr2:85300424_85300831	-59752	TCF7L1	Distal Intergenic	1.73746	2.39022	7.69083	0.00555021	0.278062
peak_38207	chr2	61763634	61765045	chr2:61763634_61765045	373	XPO1	5' UTR	0.992454	2.39103	7.68468	0.00556915	0.278343
peak_49681	chr3	71431174	71431471	chr3:71431174_71431471	159769	MIR1284	Intron	1.59189	3.07593	7.68323	0.00557363	0.278343
peak_34529	chr19	25914320	25914558	chr19:25914320_25914558	-1568071	HAVCR1P1	Distal Intergenic	1.04078	2.2233	7.67079	0.0056122	0.278955
peak_48043	chr3	9862515	9862986	chr3:9862515_9862986	10871	TTLL3	Intron	0.904018	3.1031	7.67064	0.00561265	0.278955
peak_62727	chr6	156268792	156270469	chr6:156268792_156270469	-491755	NOX3	Distal Intergenic	3.15308	2.26526	7.6723	0.00560749	0.278955
peak_30130	chr17	67855613	67856066	chr17:67855613_67856066	-215300	KCNJ16	Distal Intergenic	0.942708	2.73054	7.6615	0.00564116	0.279483
peak_74770	chrX	16671009	16671415	chrX:16671009_16671415	2728	S100G	Intron	-0.424248	5.92696	7.66261	0.0056377	0.279483
peak_66874	chr7	115024322	115024553	chr7:115024322_115024553	462113	MDFIC	Distal Intergenic	0.680681	4.41276	7.64999	0.00567726	0.280827
peak_60559	chr6	41732544	41736062	chr6:41732544_41736062	11568	FRS3	Downstream	-0.971837	3.96751	7.64108	0.00570537	0.281772
peak_75750	chrX	100928561	100929934	chrX:100928561_100929934	-13698	ARMCX2	Distal Intergenic	0.631798	5.30195	7.61001	0.00580451	0.286216
peak_72530	chr9	83622506	83624526	chr9:83622506_83624526	679070	TLE1	Distal Intergenic	-0.553949	5.82114	7.59834	0.0058422	0.287419
peak_28152	chr17	17890990	17891521	chr17:17890990_17891521	14863	DRC3	Exon	1.87305	5.41289	7.5964	0.0058485	0.287419
peak_32594	chr19	400056	400545	chr19:400056_400545	8625	C2CD4C	Distal Intergenic	0.894745	2.99418	7.59269	0.00586053	0.287419
peak_40270	chr2	136281150	136282367	chr2:136281150_136282367	6439	ZRANB3	Intron	1.89684	3.42127	7.59111	0.00586569	0.287419
peak_69114	chr8	58800771	58802628	chr8:58800771_58802628	-104485	FAM110B	Distal Intergenic	-0.949763	2.67022	7.57454	0.00591984	0.289618
peak_60214	chr6	33271197	33272540	chr6:33271197_33272540	275530	BAK1	3' UTR	4.11633	2.98814	7.56968	0.00593583	0.289946
peak_33032	chr19	5001513	5001774	chr19:5001513_5001774	32389	KDM4B	Intron	1.02336	2.27426	7.53777	0.00604188	0.294667
peak_59689	chr6	16319559	16320691	chr6:16319559_16320691	80748	GMPR	Intron	1.40643	2.521	7.52652	0.00607972	0.295763
peak_36348	chr19	55086157	55087811	chr19:55086157_55087811	1675	LILRA2	Exon	2.07603	2.71251	7.52547	0.00608328	0.295763
peak_48505	chr3	30263417	30263806	chr3:30263417_30263806	-384188	TGFBR2	Distal Intergenic	0.649466	4.67294	7.51947	0.00610357	0.296289
peak_61991	chr6	129773313	129773553	chr6:129773313_129773553	408863	TMEM244	Intron	0.842058	2.61291	7.51242	0.0061275	0.296798
peak_54002	chr4	108466181	108468098	chr4:108466181_108468098	173321	PAPSS1	Distal Intergenic	1.0939	2.33019	7.51079	0.00613306	0.296798
peak_25153	chr16	2602308	2602758	chr16:2602308_2602758	14343	PDPK1	Intron	1.74343	2.29278	7.50296	0.00615977	0.29763
peak_31947	chr18	36464488	36464768	chr18:36464488_36464768	-791917	MIR5583-1	Distal Intergenic	1.7377	2.33408	7.48645	0.0062165	0.299446
peak_73371	chr9	124617450	124617933	chr9:124617450_124617933	237952	TTLL11	Intron	-1.10747	3.2301	7.48818	0.00621053	0.299446
peak_34722	chr19	26442980	26443996	chr19:26442980_26443996	1840852	LINC00662	Distal Intergenic	-0.576492	5.57396	7.47532	0.00625504	0.299916
peak_55802	chr5	47832967	47833379	chr5:47832967_47833379	1903855	EMB	Distal Intergenic	1.43074	2.26496	7.48024	0.00623798	0.299916
peak_75818	chrX	104122611	104123466	chrX:104122611_104123466	311615	IL1RAPL2	Intron	0.636128	4.90304	7.47609	0.00625237	0.299916
peak_51649	chr3	183513198	183513844	chr3:183513198_183513844	29549	MAP6D1	Intron	-0.863301	2.8432	7.45089	0.00634051	0.302913
peak_61349	chr6	90175741	90176538	chr6:90175741_90176538	32844	ANKRD6	Intron	1.49831	2.45968	7.4546	0.00632746	0.302913
peak_65733	chr7	60036476	60037127	chr7:60036476_60037127	2526593	ZNF716	Distal Intergenic	-0.615062	5.0598	7.44916	0.00634662	0.302913
peak_5479	chr1	167460559	167461590	chr1:167460559_167461590	26257	CD247	Intron	1.66105	2.50815	7.44139	0.00637406	0.303759
peak_27855	chr17	7560452	7562486	chr17:7560452_7562486	6198	ATP1B2	3' UTR	2.03206	5.66466	7.42629	0.00642779	0.304006
peak_35649	chr19	43639339	43640625	chr19:43639339_43640625	50063	PSG5	Intron	1.56489	2.22969	7.43644	0.00639161	0.304006
peak_41337	chr2	194491248	194491919	chr2:194491248_194491919	876677	PCGEM1	Distal Intergenic	0.97158	2.78433	7.42626	0.00642786	0.304006
peak_45522	chr21	34786321	34787164	chr21:34786321_34787164	11119	IFNGR2	Intron	1.79149	2.32018	7.43434	0.00639908	0.304006
peak_73930	chr9	136532501	136534434	chr9:136532501_136534434	-9971	DBH-AS1	Intron	-0.452428	5.25629	7.42775	0.00642255	0.304006
peak_34916	chr19	26917132	26917464	chr19:26917132_26917464	1367384	LINC00662	Distal Intergenic	1.94724	2.51344	7.4146	0.00646966	0.30552
peak_47055	chr22	37228512	37229130	chr22:37228512_37229130	-12995	PVALB	Distal Intergenic	1.26878	3.24156	7.40683	0.00649767	0.30638
peak_70571	chr8	143933702	143934514	chr8:143933702_143934514	17485	GML	Distal Intergenic	-0.61791	6.12359	7.40392	0.0065082	0.306415
peak_58759	chr5	172081601	172081875	chr5:172081601_172081875	13325	NEURL1B	Intron	2.07087	5.70237	7.40088	0.00651918	0.30647
peak_50677	chr3	127291572	127292024	chr3:127291572_127292024	17578	TPRA1	3' UTR	1.53762	3.5201	7.39493	0.00654079	0.307024
peak_52244	chr4	1046391	1047626	chr4:1046391_1047626	41451	FGFRL1	Distal Intergenic	1.08901	2.81532	7.37447	0.00661562	0.309607
peak_62559	chr6	149647582	149649258	chr6:149647582_149649258	-72237	SUMO4	Intron	1.25106	3.26434	7.37567	0.00661123	0.309607
peak_28112	chr17	17391477	17392687	chr17:17391477_17392687	7022	RASD1	Intron	1.38754	3.24836	7.37161	0.00662617	0.309637
peak_3881	chr1	123285715	123286170	chr1:123285715_123286170	2024805	EMBP1	Distal Intergenic	-0.930175	2.2341	7.36533	0.00664932	0.310255
peak_57103	chr5	80097511	80097737	chr5:80097511_80097737	-146711	DHFR	Intron	-0.703483	6.49351	7.34906	0.00670979	0.31261
peak_25185	chr16	3007236	3007504	chr16:3007236_3007504	-6713	KREMEN2	Distal Intergenic	1.73355	2.42212	7.34607	0.00672095	0.312664
peak_60705	chr6	44264344	44265961	chr6:44264344_44265961	0	TCTE1	Promoter	1.96114	4.02836	7.33492	0.00676277	0.312803
peak_71263	chr9	34171418	34172338	chr9:34171418_34172338	-6665	UBAP1	Distal Intergenic	-0.389188	6.2745	7.34129	0.00673883	0.312803
peak_74671	chrX	11908335	11908668	chrX:11908335_11908668	132057	MSL3	Distal Intergenic	1.56461	2.5554	7.3355	0.00676058	0.312803
peak_54710	chr4	167109744	167110206	chr4:167109744_167110206	315334	TLL1	Distal Intergenic	1.28852	3.73603	7.3346	0.00676396	0.312803
peak_50007	chr3	91891227	91891485	chr3:91891227_91891485	1801449	PROS1	Distal Intergenic	0.846877	3.81106	7.32688	0.00679308	0.313686
peak_49253	chr3	51995262	51996451	chr3:51995262_51996451	5031	PCBP4	5' UTR	1.34488	2.2538	7.32347	0.00680598	0.313818
peak_48677	chr3	33848080	33849466	chr3:33848080_33849466	8017	PDCD6IP	Intron	0.863554	2.89936	7.31903	0.00682281	0.314131
peak_43085	chr20	17617502	17617878	chr20:17617502_17617878	45050	RRBP1	Intron	1.40254	2.50623	7.31105	0.00685319	0.315065
peak_53431	chr4	76948566	76951134	chr4:76948566_76951134	-3877	CXCL10	Intron	1.6199	3.16873	7.3071	0.00686827	0.315295
peak_71016	chr9	16154560	16154918	chr9:16154560_16154918	121393	C9orf92	Distal Intergenic	1.05855	2.42822	7.29861	0.00690078	0.315398
peak_25843	chr16	28137008	28137485	chr16:28137008_28137485	-62178	GSG1L	Exon	0.725425	4.19651	7.30351	0.006882	0.315398
peak_30205	chr17	72634402	72635277	chr17:72634402_72635277	-14505	CD300E	Distal Intergenic	1.1065	2.79892	7.29958	0.00689709	0.315398
peak_45524	chr21	34792134	34792429	chr21:34792134_34792429	16932	IFNGR2	Intron	1.18535	3.42152	7.29376	0.00691945	0.315789
peak_39779	chr2	109396068	109396872	chr2:109396068_109396872	-6347	CCDC138	Intron	0.658554	4.43909	7.29065	0.00693145	0.315876
peak_56520	chr5	54517099	54518824	chr5:54517099_54518824	4319	MCIDAS	Exon	1.8078	9.33447	7.27321	0.00699908	0.318494
peak_40294	chr2	143132404	143132605	chr2:143132404_143132605	-243134	LRP1B	Distal Intergenic	1.75274	2.37746	7.26382	0.00703576	0.319233
peak_9781	chr10	86688416	86688859	chr10:86688416_86688859	600006	CCSER2	Distal Intergenic	2.0381	2.51836	7.26477	0.00703201	0.319234
peak_48816	chr3	41960961	41962868	chr3:41960961_41962868	40792	ULK4	Exon	2.28751	3.01787	7.2569	0.00706291	0.320001
peak_76355	chrX	150692392	150695394	chrX:150692392_150695394	-36613	PASD1	Distal Intergenic	-1.24455	3.39419	7.25072	0.00708725	0.320567
peak_20192	chr14	21976133	21976342	chr14:21976133_21976342	3115	METTL3	Intron	0.766313	3.43984	7.24285	0.00711839	0.320567
peak_48762	chr3	39101052	39101516	chr3:39101052_39101516	7545	WDR48	Intron	1.06902	2.16518	7.24076	0.00712668	0.320567
peak_48917	chr3	44235808	44236310	chr3:44235808_44236310	-47068	TOPAZ1	Distal Intergenic	0.755025	4.18536	7.24838	0.00709649	0.320567
peak_53161	chr4	52711621	52713363	chr4:52711621_52713363	2345	DCUN1D4	Intron	0.81373	3.54283	7.24309	0.00711745	0.320567
peak_58565	chr5	157277571	157277878	chr5:157277571_157277878	8305	CLINT1	Intron	1.07326	2.5	7.23372	0.0071547	0.321365
peak_13515	chr11	107564903	107566204	chr11:107564903_107566204	16583	SLN	Distal Intergenic	1.95372	4.7104	7.22855	0.00717533	0.32183
peak_49392	chr3	57595773	57598747	chr3:57595773_57598747	-12558	ARF4	Distal Intergenic	1.04449	2.93491	7.20295	0.00727837	0.325517
peak_67132	chr7	131099201	131099485	chr7:131099201_131099485	141891	PODXL	Exon	0.946748	2.71719	7.20544	0.0072683	0.325517
peak_66400	chr7	98433310	98433554	chr7:98433310_98433554	34119	TMEM130	Distal Intergenic	-0.399963	5.52742	7.19414	0.00731422	0.325722
peak_54060	chr4	110195806	110198860	chr4:110195806_110198860	24939	COL25A1	Intron	-0.315448	6.7272	7.19556	0.00730842	0.325722
peak_58293	chr5	142769260	142771567	chr5:142769260_142771567	43510	NR3C1	Intron	0.969675	2.40586	7.19854	0.00729627	0.325722
peak_68228	chr8	10850439	10850987	chr8:10850439_10850987	41825	MIR598	Intron	-0.40014	5.96667	7.1912	0.00732618	0.325791
peak_49680	chr3	71421681	71422850	chr3:71421681_71422850	168390	MIR1284	Intron	1.58619	2.78407	7.17553	0.00739047	0.328183
peak_62449	chr6	144104833	144105322	chr6:144104833_144105322	-59186	LTV1	Intron	0.954736	2.31359	7.17261	0.00740252	0.328252
peak_30347	chr17	75487326	75488197	chr17:75487326_75488197	-54826	LOC100507351	Intron	2.35493	2.55728	7.16525	0.00743293	0.329133
peak_48903	chr3	43584014	43584468	chr3:43584014_43584468	79092	ANO10	Intron	0.877983	2.81431	7.15561	0.00747299	0.330439
peak_61745	chr6	112035496	112035807	chr6:112035496_112035807	-108019	TRAF3IP2	Exon	-0.710119	4.34641	7.11146	0.00765926	0.33588
peak_69116	chr8	58858421	58858703	chr8:58858421_58858703	-48410	FAM110B	Distal Intergenic	-0.329709	6.60534	7.10966	0.00766695	0.33588
peak_70389	chr8	138206279	138206851	chr8:138206279_138206851	1302214	FAM135B	Distal Intergenic	-1.10834	3.57118	7.114	0.00764841	0.33588
peak_72229	chr9	63562697	63562946	chr9:63562697_63562946	1931440	FAM74A4	Distal Intergenic	1.47471	2.66276	7.11053	0.00766326	0.33588
peak_72308	chr9	68584295	68584853	chr9:68584295_68584853	-129920	FRG1JP	Distal Intergenic	1.3349	2.86983	7.10866	0.00767124	0.33588
peak_29082	chr17	42107522	42108280	chr17:42107522_42108280	-15107	TMEM101	Distal Intergenic	0.839761	3.21545	7.12107	0.00761833	0.33588
peak_49337	chr3	56494566	56495207	chr3:56494566_56495207	7184	ERC2	Intron	-1.03791	3.85698	7.11263	0.00765428	0.33588
peak_20396	chr14	30979876	30980571	chr14:30979876_30980571	-47758	G2E3	Distal Intergenic	1.10829	2.71755	7.10459	0.00768868	0.336173
peak_44210	chr20	44475424	44476834	chr20:44475424_44476834	9214	ACOT8	Intron	2.00857	8.06358	7.09834	0.00771553	0.336876
peak_43480	chr20	27712499	27712858	chr20:27712499_27712858	-1522630	MIR663AHG	Distal Intergenic	1.10251	2.54665	7.094	0.00773422	0.337221
peak_58822	chr5	174170853	174171901	chr5:174170853_174171901	-6836	MIR4634	Distal Intergenic	1.2435	2.52311	7.08883	0.00775657	0.337724
peak_23753	chr15	66692529	66693584	chr15:66692529_66693584	13318	MAP2K1	Intron	1.67024	3.17781	7.06212	0.00787308	0.341378
peak_53732	chr4	89254872	89255187	chr4:89254872_89255187	-44704	HERC6	Distal Intergenic	1.0711	2.20618	7.06685	0.00785232	0.341378
peak_69950	chr8	116765865	116767411	chr8:116765865_116767411	-84637	TRPS1	Distal Intergenic	0.913264	2.37446	7.06208	0.00787325	0.341378
peak_42210	chr2	229715690	229716123	chr2:229715690_229716123	419934	PID1	Distal Intergenic	1.39186	3.407	7.05732	0.00789421	0.341813
peak_39786	chr2	109871185	109871546	chr2:109871185_109871546	58535	MIR4266	Intron	0.977492	3.13887	7.04862	0.00793265	0.342317
peak_50245	chr3	106073699	106075033	chr3:106073699_106075033	-485433	CBLB	Distal Intergenic	-0.540212	4.93226	7.04806	0.0079351	0.342317
peak_7796	chr10	8042263	8042500	chr10:8042263_8042500	52947	GATA3-AS1	Intron	2.0596	4.8933	7.04725	0.00793872	0.342317
peak_73231	chr9	114718898	114719149	chr9:114718898_114719149	24518	MIR4668	Distal Intergenic	-0.380581	5.80546	7.02993	0.00801586	0.345168
peak_76523	chrX	156030120	156030739	chrX:156030120_156030739	-1187498	TMLHE	Distal Intergenic	-0.591866	4.61774	7.01593	0.00807876	0.346444
peak_51197	chr3	152316039	152316313	chr3:152316039_152316313	-236423	P2RY1	Distal Intergenic	0.892175	2.87712	7.01817	0.00806867	0.346445
peak_56673	chr5	56869062	56869411	chr5:56869062_56869411	-90426	ACTBL2	Distal Intergenic	1.51079	2.09948	7.01642	0.00807653	0.346445
peak_58961	chr5	178113073	178115543	chr5:178113073_178115543	42160	ZNF354A	Distal Intergenic	1.60887	2.7865	6.99685	0.00816534	0.349678
peak_4133	chr1	123982235	123982597	chr1:123982235_123982597	2721325	EMBP1	Distal Intergenic	-0.823485	5.13676	6.98608	0.00821459	0.351029
peak_37352	chr2	23916616	23917265	chr2:23916616_23917265	232671	ATAD2B	Intron	2.29062	2.62444	6.98505	0.00821935	0.351029
peak_68581	chr8	26395804	26396174	chr8:26395804_26396174	24095	DPYSL2	Intron	-0.467707	5.26841	6.97989	0.00824308	0.351562
peak_45174	chr21	12792231	12793266	chr21:12792231_12793266	-1617221	ANKRD30BP2	Distal Intergenic	0.958917	3.36738	6.97477	0.0082667	0.35209
peak_51206	chr3	152383005	152383514	chr3:152383005_152383514	-169222	P2RY1	Distal Intergenic	1.12339	2.96807	6.97108	0.00828375	0.352335
peak_48469	chr3	27680550	27681707	chr3:27680550_27681707	82499	EOMES	Distal Intergenic	-0.717549	3.72087	6.96321	0.00832025	0.353407
peak_9734	chr10	80662662	80663230	chr10:80662662_80663230	165306	ZMIZ1-AS1	Distal Intergenic	0.838746	2.93793	6.9591	0.00833941	0.35374
peak_48253	chr3	16285794	16287131	chr3:16285794_16287131	19365	DPH3	Distal Intergenic	1.04483	2.27013	6.95429	0.00836186	0.353814
peak_51329	chr3	159762962	159763870	chr3:159762962_159763870	56339	IL12A	Intron	-0.530628	5.40123	6.95388	0.00836379	0.353814
peak_49405	chr3	57983744	57984229	chr3:57983744_57984229	-9898	FLNB	Distal Intergenic	0.864689	2.99986	6.94493	0.0084057	0.354869
peak_59714	chr6	16956114	16957030	chr6:16956114_16957030	-145459	STMND1	Distal Intergenic	0.643575	4.5256	6.94371	0.00841144	0.35487
peak_69016	chr8	48514047	48515324	chr8:48514047_48515324	135402	CEBPD	Intron	-0.741753	4.00956	6.94119	0.00842329	0.354891
peak_70834	chr9	2857399	2858012	chr9:2857399_2858012	-13269	PUM3	Distal Intergenic	2.04869	3.11818	6.93614	0.00844711	0.355415
peak_74494	chrX	989685	990976	chrX:989685_990976	1542412	LINC00102	Distal Intergenic	2.61619	2.78353	6.91656	0.00854012	0.357405
peak_50875	chr3	134485158	134487238	chr3:134485158_134487238	-26861	EPHB1	Distal Intergenic	-0.321185	6.21963	6.91901	0.00852842	0.357405
peak_50884	chr3	136163746	136163999	chr3:136163746_136163999	194579	PCCB	Intron	1.50922	2.2134	6.91714	0.00853733	0.357405
peak_51094	chr3	148947080	148947411	chr3:148947080_148947411	-7248	CP	Distal Intergenic	0.974295	2.26417	6.92238	0.00851234	0.357405
peak_41417	chr2	196336920	196337494	chr2:196336920_196337494	-184038	SLC39A10	Distal Intergenic	0.746432	4.74272	6.90602	0.0085906	0.358079
peak_42838	chr20	2524134	2525787	chr20:2524134_2525787	6881	TMC2	Intron	1.35255	2.24524	6.90623	0.00858961	0.358079
peak_57111	chr5	80147195	80147545	chr5:80147195_80147545	-108963	RASGRF2	Intron	1.25912	3.2747	6.90965	0.00857319	0.358079
peak_32212	chr18	58714168	58715033	chr18:58714168_58715033	-285955	CDH20	Distal Intergenic	1.83775	5.59655	6.88491	0.00869264	0.3611
peak_49440	chr3	59425612	59426418	chr3:59425612_59426418	-389854	C3orf67	Distal Intergenic	1.06	2.83157	6.88193	0.00870714	0.3611
peak_52234	chr4	931627	932918	chr4:931627_932918	5365	TMEM175	Intron	1.04653	2.39281	6.88149	0.00870927	0.3611
peak_9545	chr10	73785042	73786426	chr10:73785042_73786426	60922	CHST3	Intron	1.00025	2.39454	6.88403	0.00869693	0.3611
peak_69510	chr8	85514958	85515317	chr8:85514958_85515317	419505	RALYL	Intron	-0.310365	6.24574	6.86624	0.00878393	0.363232
peak_45462	chr21	33321200	33321938	chr21:33321200_33321938	75572	HUNK	Intron	1.38249	3.73438	6.86662	0.00878206	0.363232
peak_5272	chr1	160559849	160560999	chr1:160559849_160560999	-10543	CD84	Distal Intergenic	1.66858	4.72596	6.85597	0.00883456	0.364369
peak_53160	chr4	52588791	52589191	chr4:52588791_52589191	-120085	DCUN1D4	Distal Intergenic	-1.16685	2.82022	6.85593	0.00883475	0.364369
peak_39576	chr2	101827992	101828892	chr2:101827992_101828892	-40453	CNOT11	Distal Intergenic	1.04189	4.13627	6.85139	0.00885721	0.364815
peak_8408	chr10	30998280	30999574	chr10:30998280_30999574	-79633	LYZL2	Exon	1.33218	2.51799	6.84122	0.0089078	0.365934
peak_32869	chr19	2956548	2956755	chr19:2956548_2956755	-11579	ZNF77	Distal Intergenic	1.40044	2.62012	6.84183	0.00890477	0.365934
peak_53774	chr4	95181364	95181989	chr4:95181364_95181989	52605	SMARCAD1	Intron	1.15042	2.1159	6.83293	0.00894923	0.367153
peak_66630	chr7	103343762	103345123	chr7:103343762_103345123	-257138	SLC26A5	Intron	-0.530548	5.92614	6.82363	0.00899596	0.367972
peak_30242	chr17	73901891	73902390	chr17:73901891_73902390	3509	MRPL38	Intron	1.86453	6.15333	6.82194	0.00900449	0.367972
peak_54719	chr4	168421637	168422006	chr4:168421637_168422006	-265896	SPOCK3	Distal Intergenic	1.52728	2.20921	6.82262	0.00900103	0.367972
peak_60954	chr6	59183756	59184035	chr6:59183756_59184035	-896032	GUSBP4	Distal Intergenic	-1.17517	3.22039	6.80723	0.00907895	0.369565
peak_65367	chr7	50384444	50384993	chr7:50384444_50384993	40066	IKZF1	Intron	-0.316695	6.11907	6.81055	0.00906207	0.369565
peak_72115	chr9	45273902	45274346	chr9:45273902_45274346	283666	FAM27C	Distal Intergenic	-0.426316	5.57996	6.80849	0.00907257	0.369565
peak_13947	chr11	123100340	123101185	chr11:123100340_123101185	-34333	CLMP	Distal Intergenic	2.04479	2.65223	6.80029	0.0091143	0.370522
peak_32765	chr19	1881608	1885867	chr19:1881608_1885867	0	ABHD17A	Promoter	0.973883	2.17942	6.79165	0.00915851	0.371836
peak_61891	chr6	125066625	125067709	chr6:125066625_125067709	-216153	RNF217	Intron	1.34846	3.05489	6.78904	0.00917194	0.371898
peak_75454	chrX	65528853	65529104	chrX:65528853_65529104	146420	HEPH	Distal Intergenic	-0.734667	3.54676	6.77778	0.00922996	0.373766
peak_60366	chr6	36114919	36115717	chr6:36114919_36115717	16658	MAPK13	Distal Intergenic	1.61223	3.22324	6.77321	0.00925362	0.374239
peak_74562	chrX	2503037	2503261	chrX:2503037_2503261	30127	LINC00102	Distal Intergenic	-0.45074	5.15839	6.76136	0.00931529	0.376028
peak_45353	chr21	29079065	29079459	chr21:29079065_29079459	-15239	LINC00113	Distal Intergenic	1.0931	2.21679	6.76009	0.00932191	0.376028
peak_62416	chr6	143136146	143136784	chr6:143136146_143136784	129554	HIVEP2	Intron	2.04535	4.93205	6.75462	0.00935055	0.376697
peak_57797	chr5	131250808	131251467	chr5:131250808_131251467	29924	MEIKIN	Intron	-0.804538	3.91395	6.74807	0.00938493	0.37711
peak_67287	chr7	139100253	139101230	chr7:139100253_139101230	11042	LOC100129148	Intron	-0.327193	7.03913	6.74998	0.00937486	0.37711
peak_60498	chr6	39102222	39102512	chr6:39102222_39102512	-19357	SAYSD1	Distal Intergenic	0.964868	3.13869	6.74483	0.00940197	0.37731
peak_44053	chr20	37269630	37270093	chr20:37269630_37270093	39053	ARHGAP40	Intron	1.82798	5.60404	6.7407	0.00942374	0.377673
peak_44248	chr20	45043959	45044628	chr20:45043959_45044628	17076	ELMO2	Intron	0.453766	6.22128	6.73854	0.00943517	0.377673
peak_54298	chr4	133148233	133148457	chr4:133148233_133148457	-922013	PCDH10	Distal Intergenic	2.46997	2.18996	6.73132	0.00947344	0.377766
peak_60612	chr6	42555714	42556158	chr6:42555714_42556158	23954	UBR2	Intron	-0.292869	6.97272	6.73126	0.00947377	0.377767
peak_72567	chr9	85940278	85942179	chr9:85940278_85942179	211169	FRMD3	Intron	-1.19208	4.6192	6.73192	0.00947028	0.377767
peak_10566	chr10	119818428	119819094	chr10:119818428_119819094	12096	CASC2	Intron	1.22748	2.76857	6.72733	0.00949464	0.378117
peak_59684	chr6	16179570	16181051	chr6:16179570_16181051	37783	MIR4639	Distal Intergenic	1.24857	2.12265	6.72489	0.00950767	0.378154
peak_17838	chr12	121832726	121833132	chr12:121832726_121833132	-4754	RNF34	Distal Intergenic	1.17679	2.14677	6.71549	0.00955789	0.379668
peak_25821	chr16	27366893	27368707	chr16:27366893_27368707	41663	IL4R	Exon	0.800083	3.01321	6.70368	0.0096214	0.381203
peak_34568	chr19	26035459	26035676	chr19:26035459_26035676	-1689210	HAVCR1P1	Distal Intergenic	0.879322	2.18724	6.70151	0.00963312	0.381203
peak_60884	chr6	57941101	57941607	chr6:57941101_57941607	346117	GUSBP4	Distal Intergenic	-0.919604	3.04291	6.70474	0.00961568	0.381203
peak_46202	chr22	14521009	14521522	chr22:14521009_14521522	1766415	POTEH	Distal Intergenic	1.34908	2.94767	6.69685	0.00965835	0.381376
peak_46395	chr22	19421120	19421632	chr22:19421120_19421632	1084	MRPL40	Intron	0.952886	2.47591	6.6962	0.00966188	0.381376
peak_37566	chr2	29188782	29189728	chr2:29188782_29189728	-14436	TOGARAM2	Distal Intergenic	1.8002	2.30551	6.68238	0.00973707	0.383859
peak_61595	chr6	108798271	108799170	chr6:108798271_108799170	-81856	FOXO3	Exon	-1.12846	2.35166	6.67525	0.00977608	0.384912
peak_11183	chr11	6474909	6475598	chr11:6474909_6475598	-12655	HPX	Intron	1.72478	5.07425	6.67284	0.00978928	0.384947
peak_34604	chr19	26123447	26123718	chr19:26123447_26123718	-1777198	HAVCR1P1	Distal Intergenic	0.822127	2.73457	6.66718	0.00982043	0.385561
peak_57741	chr5	126508504	126509481	chr5:126508504_126509481	-99320	C5orf63	Distal Intergenic	1.77643	2.58518	6.66552	0.00982957	0.385561
peak_66226	chr7	86202034	86202396	chr7:86202034_86202396	-70834	GRM3	Distal Intergenic	-0.763783	3.74807	6.65214	0.00990367	0.387495
peak_23934	chr15	72503253	72504169	chr15:72503253_72504169	-13117	GRAMD2A	Intron	1.05068	2.7092	6.65395	0.00989362	0.387495
peak_54944	chr4	187505327	187505770	chr4:187505327_187505770	-28790	MTNR1A	Distal Intergenic	-0.279264	6.82667	6.64357	0.00995141	0.388876
peak_40259	chr2	136129283	136130320	chr2:136129283_136130320	158486	ZRANB3	Intron	1.66332	2.09803	6.63912	0.0099763	0.389258
peak_61465	chr6	102910775	102911093	chr6:102910775_102911093	1064106	GRIK2	Distal Intergenic	1.38854	2.19615	6.63738	0.00998607	0.389258
peak_30905	chr17	82697569	82699643	chr17:82697569_82699643	1522903	RPL23AP87	Distal Intergenic	0.880542	2.61013	6.62821	0.0100376	0.390779
peak_9962	chr10	94544740	94546555	chr10:94544740_94546555	-44380	EXOC6	Distal Intergenic	2.07228	5.7384	6.62202	0.0100725	0.391652
peak_47445	chr22	42792818	42793062	chr22:42792818_42793062	35339	NFAM1	Intron	0.844488	2.52079	6.61977	0.0100853	0.391659
peak_12086	chr11	52420600	52421274	chr11:52420600_52421274	905318	OR4C46	Distal Intergenic	1.21325	2.48046	6.61421	0.0101168	0.39191
peak_56414	chr5	49763658	49763961	chr5:49763658_49763961	-26424	EMB	Distal Intergenic	0.977665	2.4343	6.61507	0.0101119	0.39191
peak_54942	chr4	186723411	186723919	chr4:186723411_186723919	153951	SORBS2	Intron	0.963179	2.28765	6.61011	0.0101402	0.392329
peak_70361	chr8	133563714	133564353	chr8:133563714_133564353	9373	HPYR1	Distal Intergenic	-0.579692	4.68069	6.60329	0.0101791	0.393347
peak_55312	chr5	31995668	31996308	chr5:31995668_31996308	-59403	MIR4279	Exon	-2.02655	4.95247	6.59777	0.0102107	0.393813
peak_72184	chr9	60674403	60675148	chr9:60674403_60675148	4819238	FAM74A4	Distal Intergenic	-0.550769	4.80064	6.59679	0.0102163	0.393813
peak_74759	chrX	16123318	16123676	chrX:16123318_16123676	-17748	GRPR	Distal Intergenic	1.10506	2.78729	6.58901	0.010261	0.395049
peak_39592	chr2	102271985	102272307	chr2:102271985_102272307	-41858	MAP4K4	Distal Intergenic	0.90131	3.07455	6.58571	0.0102801	0.395296
peak_42646	chr2	240641418	240641692	chr2:240641418_240641692	-42862	LOC150935	Distal Intergenic	-1.25925	2.19847	6.57191	0.0103601	0.397882
peak_57037	chr5	76849625	76850568	chr5:76849625_76850568	-61293	WDR41	Distal Intergenic	0.945721	2.1342	6.56417	0.0104052	0.398637
peak_66038	chr7	74067557	74068435	chr7:74067557_74068435	-3595	GTF2I	Distal Intergenic	1.88899	3.4208	6.56493	0.0104008	0.398637
peak_56418	chr5	49891456	49891784	chr5:49891456_49891784	-69949	PARP8	Distal Intergenic	1.21121	3.66227	6.55839	0.0104391	0.399444
peak_13526	chr11	108111331	108111567	chr11:108111331_108111567	17772	ATM	Intron	1.83944	2.66615	6.5536	0.0104672	0.399828
peak_30117	chr17	67658942	67659423	chr17:67658942_67659423	248104	MAP2K6	Distal Intergenic	1.35633	3.2299	6.54632	0.0105101	0.399828
peak_40400	chr2	150022074	150022508	chr2:150022074_150022508	127093	LYPD6B	Intron	1.95947	8.92597	6.55125	0.0104811	0.399828
peak_68341	chr8	17676092	17676524	chr8:17676092_17676524	-17666	MTUS1	Distal Intergenic	-0.929353	2.57396	6.54583	0.010513	0.399828
peak_68629	chr8	27614144	27614910	chr8:27614144_27614910	15260	CCDC25	Exon	1.36893	2.62722	6.54694	0.0105065	0.399828
peak_38157	chr2	60556882	60557695	chr2:60556882_60557695	56885	MIR4432	Distal Intergenic	-0.36336	5.99564	6.53596	0.0105715	0.401563
peak_37439	chr2	26184198	26185561	chr2:26184198_26185561	19882	KIF3C	Intron	0.835625	3.11581	6.527	0.0106249	0.401837
peak_50713	chr3	128426117	128426919	chr3:128426117_128426919	-18060	RAB7A	Distal Intergenic	-0.287946	6.77505	6.52883	0.010614	0.401837
peak_52057	chr3	196711353	196713301	chr3:196711353_196713301	-15649	PIGZ	Distal Intergenic	-0.322109	6.64259	6.52612	0.0106301	0.401837
peak_75407	chrX	56977897	56978740	chrX:56977897_56978740	43248	SPIN3	Distal Intergenic	-0.641093	5.03106	6.5312	0.0105998	0.401837
peak_55797	chr5	47822121	47822669	chr5:47822121_47822669	1914565	EMB	Distal Intergenic	0.647355	5.51871	6.519	0.0106728	0.402696
peak_65000	chr7	35520081	35520528	chr7:35520081_35520528	166615	LOC401324	Distal Intergenic	0.825363	2.62228	6.51803	0.0106786	0.402696
peak_55859	chr5	47981001	47983315	chr5:47981001_47983315	1753919	EMB	Distal Intergenic	-0.268108	7.16035	6.51012	0.0107262	0.403517
peak_69629	chr8	94024925	94025762	chr8:94024925_94025762	4139	TRIQK	Intron	-0.317874	6.04057	6.51181	0.010716	0.403517
peak_13761	chr11	118338211	118339606	chr11:118338211_118339606	31006	KMT2A	5' UTR	1.58911	2.7197	6.50525	0.0107556	0.403653
peak_62299	chr6	139116084	139116781	chr6:139116084_139116781	-467	ECT2L	Promoter	2.05738	6.73616	6.50605	0.0107508	0.403653
peak_25686	chr16	21952222	21953946	chr16:21952222_21953946	-10663	UQCRC2	Distal Intergenic	0.806399	2.34502	6.50104	0.0107812	0.404126
peak_32809	chr19	2289354	2291270	chr19:2289354_2291270	-7173	PEAK3	5' UTR	1.01421	2.26355	6.49502	0.0108177	0.404206
peak_38862	chr2	88169893	88171197	chr2:88169893_88171197	184051	KRCC1	Intron	0.880777	2.70512	6.4943	0.0108221	0.404206
peak_7881	chr10	11465363	11465690	chr10:11465363_11465690	187989	USP6NL	Distal Intergenic	0.801099	2.6236	6.49545	0.0108151	0.404206
peak_20475	chr14	35422262	35423070	chr14:35422262_35423070	13134	IGBP1P1	Distal Intergenic	0.932978	2.10465	6.48882	0.0108555	0.40497
peak_69985	chr8	118279376	118279989	chr8:118279376_118279989	-252976	MED30	Distal Intergenic	0.883295	2.51526	6.47099	0.0109649	0.408565
peak_16439	chr12	57229168	57230237	chr12:57229168_57230237	72060	HSD17B6	Distal Intergenic	0.830461	2.45698	6.45654	0.0110545	0.409505
peak_26262	chr16	49455135	49455527	chr16:49455135_49455527	47327	C16orf78	Distal Intergenic	1.05179	2.18349	6.46169	0.0110224	0.409505
peak_45506	chr21	34192542	34193060	chr21:34192542_34193060	-6489	C21orf62	Distal Intergenic	0.753119	3.03476	6.45854	0.011042	0.409505
peak_45764	chr21	42424632	42425935	chr21:42424632_42425935	94056	LINC00323	Distal Intergenic	0.673434	4.33943	6.46336	0.0110121	0.409505
peak_56186	chr5	48890318	48890562	chr5:48890318_48890562	846672	EMB	Distal Intergenic	0.804692	3.26133	6.45635	0.0110557	0.409505
peak_70846	chr9	3507417	3507685	chr9:3507417_3507685	18298	RFX3	Intron	-0.293908	6.5939	6.45183	0.0110838	0.410062
peak_64560	chr7	7761096	7762788	chr7:7761096_7762788	-2858	RPA3	Intron	-0.934791	2.53165	6.44243	0.0111426	0.411751
peak_67552	chr7	149535176	149535530	chr7:149535176_149535530	0	ZNF862	Promoter	-0.297226	6.62672	6.43838	0.0111681	0.412203
peak_50075	chr3	94654456	94654678	chr3:94654456_94654678	-2429	LINC00879	Promoter	1.05618	3.40516	6.43377	0.0111971	0.412787
peak_58347	chr5	147453242	147454615	chr5:147453242_147454615	9707	SPINK5	Intron	-0.439534	5.91584	6.43159	0.0112108	0.412805
peak_61847	chr6	119129155	119129617	chr6:119129155_119129617	25284	SELENOKP3	Distal Intergenic	-1.1101	2.74615	6.42792	0.011234	0.413175
peak_72522	chr9	81687203	81687589	chr9:81687203_81687589	-499289	TLE4	Distal Intergenic	-0.444706	5.1296	6.42372	0.0112606	0.413665
peak_72872	chr9	96922734	96922997	chr9:96922734_96922997	-15242	MIRLET7A1	Distal Intergenic	-0.302117	6.2619	6.41643	0.0113069	0.414878
peak_28752	chr17	35187981	35188936	chr17:35187981_35188936	-105836	LHX1	Distal Intergenic	-2.40382	3.31324	6.38087	0.0115357	0.419014
peak_37445	chr2	26396705	26397388	chr2:26396705_26397388	745	GAREM2	Intron	0.664214	3.87208	6.38363	0.0115177	0.419014
peak_42814	chr20	1684720	1686971	chr20:1684720_1686971	-46295	SIRPG	Distal Intergenic	1.75872	3.28555	6.38954	0.0114795	0.419014
peak_42928	chr20	4289178	4289425	chr20:4289178_4289425	-59519	ADRA1D	Distal Intergenic	0.799648	3.41335	6.38658	0.0114986	0.419014
peak_48438	chr3	23882264	23882629	chr3:23882264_23882629	34880	UBE2E1	Intron	-0.659238	4.29697	6.37811	0.0115537	0.419014
peak_49965	chr3	91146747	91146961	chr3:91146747_91146961	1990073	EPHA3	Distal Intergenic	1.72994	8.30012	6.38284	0.0115229	0.419014
peak_50431	chr3	112987301	112987503	chr3:112987301_112987503	56889	BOC	Intron	-1.42531	3.96478	6.38495	0.0115092	0.419014
peak_62640	chr6	152118718	152118946	chr6:152118718_152118946	140888	ESR1	Intron	-0.66508	6.216	6.39309	0.0114565	0.419014
peak_66496	chr7	100515936	100516863	chr7:100515936_100516863	-21397	ACHE	Distal Intergenic	0.72961	3.36528	6.38924	0.0114814	0.419014
peak_74666	chrX	11770047	11770709	chrX:11770047_11770709	-5569	MSL3	Distal Intergenic	0.690375	3.90422	6.37969	0.0115433	0.419014
peak_26269	chr16	49527930	49528991	chr16:49527930_49528991	120122	C16orf78	Intron	2.00444	3.52195	6.35882	0.0116799	0.423102
peak_29713	chr17	57603815	57604839	chr17:57603815_57604839	-38047	DHX40	Distal Intergenic	-0.513113	5.31056	6.3539	0.0117124	0.423297
peak_62361	chr6	142544127	142545433	chr6:142544127_142545433	75717	VTA1	Distal Intergenic	-0.291228	6.99432	6.35393	0.0117121	0.423297
peak_61949	chr6	127897600	127897810	chr6:127897600_127897810	-509	C6orf58	Promoter	-0.960371	3.11998	6.33471	0.0118398	0.427408
peak_49651	chr3	71262922	71263134	chr3:71262922_71263134	328106	MIR1284	Intron	0.717602	3.69332	6.33014	0.0118703	0.428016
peak_52614	chr4	14835723	14835946	chr4:14835723_14835946	167723	CPEB2-DT	Intron	1.25406	2.80762	6.31928	0.0119432	0.430147
peak_19008	chr13	46595173	46595690	chr13:46595173_46595690	31204	ZC3H13	Intron	2.01593	4.75488	6.31306	0.0119852	0.430531
peak_22814	chr15	30572620	30573333	chr15:30572620_30573333	84381	LINC02249	Intron	2.02991	6.87176	6.31159	0.0119952	0.430531
peak_71300	chr9	35023210	35023581	chr9:35023210_35023581	-17521	C9orf131	Distal Intergenic	-0.712882	7.01472	6.31471	0.011974	0.430531
peak_53958	chr4	108097942	108098235	chr4:108097942_108098235	106611	DKK2	Intron	1.73252	2.52286	6.30383	0.0120477	0.431922
peak_9503	chr10	72305427	72305830	chr10:72305427_72305830	56701	PRF1	Intron	0.943242	2.41714	6.30043	0.0120709	0.432257
peak_50898	chr3	136484562	136484893	chr3:136484562_136484893	-13317	STAG1	Distal Intergenic	1.32361	2.14066	6.29748	0.0120909	0.43248
peak_58072	chr5	138337218	138339724	chr5:138337218_138339724	-126161	LRRTM2	Intron	0.499467	5.03007	6.2952	0.0121065	0.432542
peak_52287	chr4	1614685	1615678	chr4:1614685_1615678	70310	FAM53A	Distal Intergenic	1.39164	3.16557	6.28887	0.0121499	0.4331
peak_68720	chr8	30097075	30097284	chr8:30097075_30097284	10929	MIR548O2	Intron	-0.320747	6.31796	6.28985	0.0121431	0.4331
peak_37343	chr2	23452377	23453618	chr2:23452377_23453618	-154680	KLHL29	Distal Intergenic	0.772937	3.06821	6.27495	0.0122456	0.436017
peak_58810	chr5	173408229	173408682	chr5:173408229_173408682	7444	C5orf47	Intron	1.48585	2.76742	6.26608	0.0123071	0.437709
peak_31324	chr18	5073171	5074035	chr18:5073171_5074035	123220	AKAIN1	Distal Intergenic	0.582435	4.47753	6.25531	0.0123822	0.439876
peak_54939	chr4	186432411	186434784	chr4:186432411_186434784	21928	PDLIM3	3' UTR	0.581754	3.97812	6.24767	0.0124357	0.441275
peak_21777	chr14	95527341	95527739	chr14:95527341_95527739	76584	MIR3173	Distal Intergenic	-1.24224	2.32562	6.2363	0.0125158	0.443592
peak_66302	chr7	92133391	92135475	chr7:92133391_92135475	22370	PEX1	Exon	-1.25994	3.03382	6.23438	0.0125293	0.443592
peak_5197	chr1	158113103	158113959	chr1:158113103_158113959	-2673	LINC01704	Distal Intergenic	1.21603	2.14796	6.21564	0.0126627	0.447806
peak_66885	chr7	116226399	116226790	chr7:116226399_116226790	-85669	MET	Distal Intergenic	1.57731	2.21658	6.20463	0.0127416	0.449331
peak_70216	chr8	127936413	127936689	chr8:127936413_127936689	-88710	PCAT1	Distal Intergenic	0.788359	3.29116	6.20362	0.0127489	0.449331
peak_70968	chr9	7935349	7936747	chr9:7935349_7936747	-135550	DMAC1	Distal Intergenic	-0.316625	5.94469	6.20542	0.012736	0.449331
peak_29333	chr17	46259964	46260611	chr17:46259964_46260611	-26091	MIR1203	Intron	1.6073	2.15829	6.19727	0.0127948	0.450439
peak_16363	chr12	56115922	56119190	chr12:56115922_56119190	1771	RDH5	3' UTR	0.682146	3.3908	6.19433	0.012816	0.45068
peak_70537	chr8	143486914	143488451	chr8:143486914_143488451	-2371	TSNARE1	Promoter	0.500016	4.68262	6.18609	0.0128758	0.452274
peak_25013	chr16	700549	701246	chr16:700549_701246	1186	WDR90	Exon	0.806069	4.58698	6.18031	0.012918	0.452861
peak_46525	chr22	21207331	21207757	chr22:21207331_21207757	5343	PI4KA	Intron	0.887533	2.1979	6.17389	0.012965	0.452861
peak_53610	chr4	83083329	83084696	chr4:83083329_83084696	210453	HNRNPD	Distal Intergenic	0.941547	2.92517	6.17637	0.0129468	0.452861
peak_68664	chr8	28776983	28777996	chr8:28776983_28777996	29072	HMBOX1	Intron	-0.292186	7.07923	6.17443	0.012961	0.452861
peak_75566	chrX	71714178	71714805	chrX:71714178_71714805	78148	HDAC8	Intron	1.32325	2.88587	6.17755	0.0129382	0.452861
peak_61043	chr6	59829208	59829762	chr6:59829208_59829762	-1541484	GUSBP4	Distal Intergenic	-0.305926	6.25173	6.1614	0.0130568	0.45556
peak_69102	chr8	58567599	58567911	chr8:58567599_58567911	-339202	FAM110B	Distal Intergenic	0.917269	2.81657	6.15793	0.0130824	0.455944
peak_34885	chr19	26840702	26841004	chr19:26840702_26841004	1443844	LINC00662	Distal Intergenic	1.83348	3.80416	6.15532	0.0131017	0.456057
peak_58869	chr5	176535365	176535595	chr5:176535365_176535595	21444	FGFR4	Distal Intergenic	-0.412698	6.93722	6.15356	0.0131148	0.456057
peak_57527	chr5	110031562	110031913	chr5:110031562_110031913	30537	TMEM232	Intron	-1.09228	2.95817	6.14559	0.013174	0.457606
peak_65493	chr7	58401030	58401832	chr7:58401030_58401832	891147	ZNF716	Distal Intergenic	-0.974685	3.64954	6.12927	0.0132962	0.461337
peak_49404	chr3	57967456	57968163	chr3:57967456_57968163	-25964	FLNB	Distal Intergenic	1.19536	2.41645	6.12688	0.0133141	0.461448
peak_62566	chr6	149834299	149834826	chr6:149834299_149834826	-28151	ZC3H12D	Intron	1.07867	2.56793	6.11347	0.0134156	0.464277
peak_64966	chr7	32489789	32491213	chr7:32489789_32491213	6893	LOC100130673	Distal Intergenic	1.18913	2.99678	6.11148	0.0134307	0.464277
peak_66037	chr7	74062189	74062405	chr7:74062189_74062405	-9625	GTF2I	Distal Intergenic	2.61512	2.84854	6.10826	0.0134552	0.464277
peak_49932	chr3	90894692	90895555	chr3:90894692_90895555	1738018	EPHA3	Distal Intergenic	1.10996	2.40997	6.10996	0.0134422	0.464277
peak_56398	chr5	49588714	49589399	chr5:49588714_49589399	147835	EMB	Distal Intergenic	0.854258	3.29122	6.09738	0.0135383	0.46663
peak_68836	chr8	38768257	38768693	chr8:38768257_38768693	9504	PLEKHA2	Intron	0.743332	3.62314	6.09163	0.0135823	0.466936
peak_25866	chr16	28351604	28352413	chr16:28351604_28352413	47764	SBK1	Distal Intergenic	1.86426	2.25666	6.09043	0.0135916	0.466936
peak_50128	chr3	100209799	100211034	chr3:100209799_100211034	-429	TMEM45A	Promoter	1.2365	2.53623	6.09038	0.013592	0.466936
peak_3487	chr1	120180120	120180696	chr1:120180120_120180696	9694	ZNF697	Intron	1.28317	2.6931	6.08776	0.0136122	0.467118
peak_45657	chr21	37457844	37458142	chr21:37457844_37458142	-6157	SETD4	Intron	1.1391	2.24191	6.08203	0.0136563	0.468119
peak_38001	chr2	48111123	48112329	chr2:48111123_48112329	20603	FBXO11	Intron	1.22368	2.13716	6.07619	0.0137016	0.469155
peak_66636	chr7	104563068	104563426	chr7:104563068_104563426	3666	LHFPL3-AS2	Intron	-0.297133	6.65218	6.06507	0.0137881	0.471602
peak_71582	chr9	43516342	43517294	chr9:43516342_43517294	113436	SPATA31A6	Distal Intergenic	-0.296793	6.27052	6.06121	0.0138183	0.472117
peak_26810	chr16	74382202	74382965	chr16:74382202_74382965	19188	LOC283922	5' UTR	1.59214	2.78095	6.04897	0.0139144	0.472218
peak_27908	chr17	8172822	8174318	chr17:8172822_8174318	-17651	RANGRF	3' UTR	1.99276	9.05597	6.05477	0.0138688	0.472218
peak_45854	chr21	43985246	43986121	chr21:43985246_43986121	65504	SLC37A1	Exon	-1.08902	2.22522	6.05596	0.0138594	0.472218
peak_57712	chr5	123401365	123402240	chr5:123401365_123402240	553572	CSNK1G3	Distal Intergenic	1.09398	2.16318	6.05115	0.0138973	0.472218
peak_61770	chr6	116265433	116265933	chr6:116265433_116265933	-93961	TPI1P3	Exon	1.25621	2.75379	6.04738	0.013927	0.472218
peak_62562	chr6	149723755	149724275	chr6:149723755_149724275	2260	SUMO4	Intron	0.634345	4.43889	6.05718	0.0138499	0.472218
peak_74523	chrX	1368965	1369400	chrX:1368965_1369400	1163988	LINC00102	Intron	0.60262	4.24754	6.04932	0.0139116	0.472218
peak_57265	chr5	88729306	88729854	chr5:88729306_88729854	-529384	MEF2C	Distal Intergenic	1.00893	2.25979	6.04186	0.0139706	0.473183
peak_49707	chr3	71681279	71681815	chr3:71681279_71681815	-48139	FOXP1	Distal Intergenic	0.869511	2.55868	6.03006	0.0140642	0.475325
peak_73291	chr9	121207470	121207830	chr9:121207470_121207830	741017	TLR4	Distal Intergenic	1.75516	2.7622	6.03033	0.0140621	0.475325
peak_11246	chr11	9003139	9005402	chr11:9003139_9005402	-16658	TMEM9B	3' UTR	0.786654	3.05053	6.01916	0.0141514	0.47583
peak_15297	chr12	35002048	35002694	chr12:35002048_35002694	826832	ALG10	Distal Intergenic	0.952811	3.16664	6.01713	0.0141676	0.47583
peak_42859	chr20	3044952	3046929	chr20:3044952_3046929	-5337	OXT	Distal Intergenic	0.832439	3.14476	6.01678	0.0141705	0.47583
peak_53413	chr4	75995747	75996124	chr4:75995747_75996124	137462	PARM1	Distal Intergenic	-0.544072	8.07298	6.02426	0.0141106	0.47583
peak_64803	chr7	25611547	25611763	chr7:25611547_25611763	268867	RNU6-16P	Distal Intergenic	1.57815	2.71345	6.02536	0.0141018	0.47583
peak_69645	chr8	94552883	94554600	chr8:94552883_94554600	158061	LINC00535	Intron	0.954538	2.43711	6.01682	0.0141702	0.47583
peak_10661	chr10	124743378	124744928	chr10:124743378_124744928	3822	PSTK	Intron	0.548471	4.21668	6.01275	0.0142029	0.476407
peak_19039	chr13	48158293	48158643	chr13:48158293_48158643	-453060	NUDT15	Distal Intergenic	-0.728374	3.82117	6.00733	0.0142465	0.477358
peak_21481	chr14	81147329	81147595	chr14:81147329_81147595	-274274	TSHR	Intron	-0.265439	8.76319	6.00323	0.0142797	0.477957
peak_58681	chr5	163503090	163507026	chr5:163503090_163507026	573020	MAT2B	Distal Intergenic	2.38384	2.09974	5.99537	0.0143435	0.479579
peak_65169	chr7	42269307	42269606	chr7:42269307_42269606	7012	GLI3	Intron	-0.341763	6.39169	5.98143	0.0144573	0.482429
peak_75415	chrX	57591513	57593230	chrX:57591513_57593230	-25039	ZXDB	Distal Intergenic	-1.53525	3.27205	5.98115	0.0144596	0.482429
peak_58124	chr5	139470490	139471362	chr5:139470490_139471362	16235	MALINC1	Distal Intergenic	1.52532	2.1656	5.97667	0.0144964	0.48314
peak_75574	chrX	71998986	71999348	chrX:71998986_71999348	-64957	PHKA1	Distal Intergenic	-0.512446	4.95827	5.97138	0.0145399	0.484076
peak_73946	chr9	136700771	136701998	chr9:136700771_136701998	-95694	SARDH	Intron	2.83741	3.41521	5.96173	0.0146197	0.486214
peak_74676	chrX	12814414	12814910	chrX:12814414_12814910	4940	PRPS2	Intron	0.805659	6.77739	5.95737	0.0146559	0.4869
peak_58365	chr5	148820703	148821056	chr5:148820703_148821056	12222	MIR143	Distal Intergenic	0.514922	5.27904	5.95259	0.0146957	0.487703
peak_39015	chr2	92515656	92517411	chr2:92515656_92517411	386497	ACTR3BP2	Distal Intergenic	1.00546	2.52344	5.9422	0.0147825	0.489634
peak_75261	chrX	49185789	49186704	chrX:49185789_49186704	-1390	GAGE8	Promoter	0.854027	3.31112	5.94189	0.0147852	0.489634
peak_72117	chr9	45289439	45289725	chr9:45289439_45289725	299203	FAM27C	Distal Intergenic	-0.345426	6.59478	5.93969	0.0148036	0.489725
peak_41946	chr2	216632948	216634348	chr2:216632948_216634348	73911	LINC00607	Intron	1.97059	8.03361	5.93764	0.0148209	0.489778
peak_42322	chr2	231714830	231715461	chr2:231714830_231715461	-14160	ITM2C	Distal Intergenic	-0.77301	3.17514	5.93085	0.014878	0.491148
peak_64346	chr7	2863429	2863932	chr7:2863429_2863932	20027	GNA12	Intron	-0.29156	6.90939	5.92612	0.014918	0.49143
peak_64807	chr7	25857076	25857280	chr7:25857076_25857280	23350	RNU6-16P	Distal Intergenic	-0.516192	6.12127	5.92715	0.0149094	0.49143
peak_50636	chr3	125212165	125213105	chr3:125212165_125213105	25953	SNX4	Intron	1.27387	2.57171	5.91801	0.0149869	0.493179
peak_5163	chr1	156747459	156748065	chr1:156747459_156748065	10185	PRCC	Intron	1.06586	2.91979	5.90545	0.0150941	0.493752
peak_36434	chr19	57350742	57352103	chr19:57350742_57352103	0	PEG3	Promoter	0.380884	5.45294	5.90078	0.0151342	0.493752
peak_48646	chr3	32951315	32952302	chr3:32951315_32952302	-40764	CCR4	Distal Intergenic	1.46093	2.30338	5.91174	0.0150403	0.493752
peak_50103	chr3	98597006	98597315	chr3:98597006_98597315	23218	DCBLD2	Intron	1.09038	2.7866	5.89615	0.015174	0.493752
peak_50175	chr3	101752856	101753952	chr3:101752856_101753952	-64136	ZPLD1	Distal Intergenic	-1.11233	2.39093	5.90093	0.0151329	0.493752
peak_53548	chr4	81153756	81154790	chr4:81153756_81154790	-32952	FGF5	Distal Intergenic	1.53232	2.47188	5.90012	0.0151398	0.493752
peak_57887	chr5	132437255	132438328	chr5:132437255_132438328	49593	HSPA4	Exon	0.808031	2.90117	5.89568	0.015178	0.493752
peak_62742	chr6	156825433	156825695	chr6:156825433_156825695	-273369	ARID1B	Distal Intergenic	-0.792266	3.2889	5.90211	0.0151228	0.493752
peak_64802	chr7	25603038	25603983	chr7:25603038_25603983	276647	RNU6-16P	Distal Intergenic	-0.282941	6.57586	5.90498	0.0150981	0.493752
peak_68062	chr8	2023906	2024273	chr8:2023906_2024273	30748	MYOM2	Exon	-0.329577	6.43753	5.89697	0.015167	0.493752
peak_70315	chr8	132875430	132875927	chr8:132875430_132875927	-40429	EFR3A	Distal Intergenic	2.28147	2.56983	5.89894	0.01515	0.493752
peak_67049	chr7	129376435	129376733	chr7:129376435_129376733	-19373	RNA5SP244	Intron	-0.924729	2.41843	5.89315	0.0151999	0.493949
peak_9599	chr10	74871511	74872720	chr10:74871511_74872720	1301	NUDT13	Intron	1.81306	6.17123	5.88944	0.0152319	0.494258
peak_36363	chr19	55305321	55305910	chr19:55305321_55305910	7547	KIR3DL1	Intron	0.911404	2.13937	5.88839	0.015241	0.494258
peak_25212	chr16	3165553	3166335	chr16:3165553_3166335	0	ZNF205-AS1	Promoter	0.795859	2.77869	5.87685	0.0153412	0.49445
peak_34877	chr19	26824203	26824600	chr19:26824203_26824600	1460248	LINC00662	Distal Intergenic	1.03172	2.77094	5.8726	0.0153783	0.49445
peak_60531	chr6	41100584	41101186	chr6:41100584_41101186	20901	TREML1	Exon	-0.260293	7.03089	5.87275	0.015377	0.49445
peak_64999	chr7	35312214	35312494	chr7:35312214_35312494	-18503	TBX20	Distal Intergenic	0.892454	2.37305	5.8852	0.0152687	0.49445
peak_67187	chr7	133853773	133854231	chr7:133853773_133854231	41668	LRGUK	Intron	3.62622	2.30528	5.8747	0.01536	0.49445
peak_68477	chr8	22443593	22444774	chr8:22443593_22444774	7339	PDLIM2	Intron	0.323716	6.37505	5.87973	0.0153162	0.49445
peak_70522	chr8	143344973	143345246	chr8:143344973_143345246	65256	LINC00051	Intron	-0.346757	5.8227	5.87134	0.0153893	0.49445
peak_71734	chr9	43897659	43898044	chr9:43897659_43898044	212774	CNTNAP3B	Intron	-0.377022	5.99751	5.88063	0.0153084	0.49445
peak_72152	chr9	45509156	45510009	chr9:45509156_45510009	-217020	NA	Intron	1.64386	3.0851	5.87593	0.0153492	0.49445
peak_42593	chr2	239331345	239331594	chr2:239331345_239331594	-4032	ASB1	Distal Intergenic	-0.385056	5.37581	5.86934	0.0154068	0.494505
peak_57745	chr5	126676062	126676694	chr5:126676062_126676694	49606	MEGF10	Exon	1.49325	2.85945	5.86645	0.0154321	0.494521
peak_70119	chr8	124592833	124593621	chr8:124592833_124593621	-39340	FBXO32	Distal Intergenic	-0.302374	6.1444	5.86567	0.0154389	0.494521
peak_37290	chr2	18520523	18520947	chr2:18520523_18520947	221012	RDH14	Distal Intergenic	0.620315	4.25019	5.855	0.0155328	0.495498
peak_58668	chr5	160418133	160419683	chr5:160418133_160419683	-52500	LINC02159	Distal Intergenic	1.35983	2.56667	5.85975	0.015491	0.495498
peak_70290	chr8	130324741	130325582	chr8:130324741_130325582	-71255	LINC00977	Distal Intergenic	-0.26414	6.83455	5.85567	0.015527	0.495498
peak_75107	chrX	43750142	43750651	chrX:43750142_43750651	-8421	MAOB	Distal Intergenic	-1.19985	2.33177	5.85859	0.0155012	0.495498
peak_59457	chr6	8063519	8064989	chr6:8063519_8064989	0	BLOC1S5-TXNDC5	Promoter	-0.685915	4.164	5.84603	0.0156123	0.496817
peak_65487	chr7	58375434	58375669	chr7:58375434_58375669	865551	ZNF716	Distal Intergenic	0.888203	3.66226	5.84494	0.0156219	0.496817
peak_33009	chr19	4638508	4640359	chr19:4638508_4640359	0	TNFAIP8L1	Promoter	-0.862491	2.50982	5.84796	0.0155951	0.496817
peak_64536	chr7	7061621	7062399	chr7:7061621_7062399	74018	LOC100131257	Distal Intergenic	-0.579408	5.21078	5.83699	0.0156926	0.497232
peak_68485	chr8	22561458	22562344	chr8:22561458_22562344	-10643	EGR3	Distal Intergenic	-0.969739	2.9956	5.83611	0.0157005	0.497232
peak_32987	chr19	4326967	4329706	chr19:4326967_4329706	13077	STAP2	Exon	0.778427	2.31788	5.83921	0.0156729	0.497232
peak_35916	chr19	47495700	47496080	chr19:47495700_47496080	-27021	NPAS1	Intron	0.621899	4.9006	5.83455	0.0157145	0.497232
peak_40274	chr2	136344303	136345555	chr2:136344303_136345555	55220	R3HDM1	Intron	0.875437	2.14711	5.83551	0.0157058	0.497232
peak_25188	chr16	3020081	3022484	chr16:3020081_3022484	739	PAQR4	5' UTR	0.696914	2.86797	5.82381	0.0158107	0.498259
peak_35764	chr19	45591032	45591233	chr19:45591032_45591233	-5198	PPP1R37	Intron	1.53682	2.11727	5.82487	0.0158011	0.498259
peak_49129	chr3	49028554	49030032	chr3:49028554_49030032	1213	P4HTM	Intron	2.03525	2.96029	5.82904	0.0157637	0.498259
peak_67323	chr7	139737532	139738502	chr7:139737532_139738502	25019	PARP12	Exon	-0.695883	4.50648	5.82619	0.0157893	0.498259
peak_65161	chr7	40700931	40701205	chr7:40700931_40701205	526356	SUGCT	Intron	0.747235	3.62108	5.81442	0.0158953	0.499742
peak_67274	chr7	139041335	139043186	chr7:139041335_139043186	15457	FMC1	Intron	0.743687	3.39001	5.81327	0.0159057	0.499742
peak_75665	chrX	78957892	78959277	chrX:78957892_78959277	-310978	TBX22	Distal Intergenic	-0.374079	5.43778	5.81507	0.0158894	0.499742
peak_56181	chr5	48879648	48879929	chr5:48879648_48879929	857305	EMB	Distal Intergenic	0.859118	2.76764	5.80502	0.0159805	0.501589
peak_67066	chr7	129951937	129953340	chr7:129951937_129953340	18963	CPA4	Exon	0.880051	2.88944	5.80258	0.0160027	0.501782
peak_44642	chr20	58321156	58321707	chr20:58321156_58321707	-117812	LOC100506384	Intron	0.871328	2.29624	5.78995	0.0161181	0.504885
peak_6757	chr1	220878699	220878926	chr1:220878699_220878926	15071	C1orf115	Distal Intergenic	0.761391	3.29003	5.78822	0.016134	0.504885
peak_43929	chr20	35145192	35145562	chr20:35145192_35145562	-24325	MYL9	Intron	0.764942	2.18991	5.78095	0.0162008	0.50647
peak_69811	chr8	101332818	101333456	chr8:101332818_101333456	-10439	RNF19A	Distal Intergenic	-0.757394	3.42921	5.7773	0.0162345	0.507015
peak_61514	chr6	106444856	106445358	chr6:106444856_106445358	-88837	PRDM1	Distal Intergenic	1.43617	2.56712	5.76953	0.0163064	0.507209
peak_12306	chr11	61113033	61113602	chr11:61113033_61113602	-2986	DDB1	Exon	1.2706	2.48005	5.76787	0.0163218	0.50721
peak_42282	chr2	230957008	230957839	chr2:230957008_230957839	-23293	SLC16A14	Distal Intergenic	1.11042	2.51751	5.77202	0.0162833	0.50721
peak_44139	chr20	41213363	41213582	chr20:41213363_41213582	604975	PTPRT	Intron	1.8783	2.23628	5.7693	0.0163085	0.50721
peak_57715	chr5	123460201	123460735	chr5:123460201_123460735	612408	CSNK1G3	Distal Intergenic	-0.289029	7.89404	5.77019	0.0163003	0.50721
peak_57909	chr5	132736810	132738137	chr5:132736810_132738137	25261	MIR1289-2	Intron	-0.403673	7.17642	5.76475	0.0163508	0.507607
peak_24570	chr15	91522574	91523148	chr15:91522574_91523148	12975	PRC1-AS1	Intron	0.976847	2.09841	5.75817	0.0164122	0.507972
peak_48486	chr3	28240862	28242278	chr3:28240862_28242278	-40846	CMC1	Distal Intergenic	1.69614	2.56596	5.75656	0.0164272	0.507972
peak_50778	chr3	129249021	129250139	chr3:129249021_129250139	1539	RHO	Exon	1.30297	2.13784	5.76057	0.0163898	0.507972
peak_55689	chr5	47515113	47516039	chr5:47515113_47516039	-1818893	HCN1	Distal Intergenic	1.37979	3.77252	5.75652	0.0164276	0.507972
peak_48735	chr3	38023485	38025727	chr3:38023485_38025727	-3803	VILL	3' UTR	1.16122	2.87452	5.75099	0.0164794	0.509069
peak_45749	chr21	42238326	42238954	chr21:42238326_42238954	-19287	DSCAM	Distal Intergenic	-0.926527	2.55664	5.73819	0.0165999	0.511481
peak_46476	chr22	20465621	20466042	chr22:20465621_20466042	-3835	RIMBP3	Exon	1.24426	3.89596	5.73749	0.0166065	0.511481
peak_60519	chr6	40482531	40482897	chr6:40482531_40482897	72229	LRFN2	Intron	0.596589	4.0637	5.73918	0.0165906	0.511481
peak_46924	chr22	32144222	32145449	chr22:32144222_32145449	671	PRR14L	Intron	0.840911	2.22618	5.735	0.0166301	0.511702
peak_60092	chr6	30344850	30345626	chr6:30344850_30345626	-1861280	GPX6	Distal Intergenic	0.75788	2.53668	5.73188	0.0166596	0.512108
peak_17685	chr12	117189493	117191092	chr12:117189493_117191092	13397	RNFT2	Intron	1.47017	2.60693	5.72668	0.016709	0.513121
peak_59904	chr6	26020105	26022376	chr6:26020105_26022376	0	HIST1H3A	Promoter	-1.73986	3.69216	5.7122	0.0168475	0.513491
peak_64884	chr7	27898782	27899155	chr7:27898782_27899155	119790	TAX1BP1	Intron	0.69457	4.18211	5.71787	0.0167931	0.513491
peak_22944	chr15	38552109	38552438	chr15:38552109_38552438	7057	SPRED1	Intron	0.756504	3.28825	5.71364	0.0168336	0.513491
peak_27224	chr16	88978618	88978953	chr16:88978618_88978953	-45550	PABPN1L	Intron	1.94958	7.20642	5.71167	0.0168525	0.513491
peak_34963	chr19	27035759	27036261	chr19:27035759_27036261	1248587	LINC00662	Distal Intergenic	1.19857	2.60723	5.71255	0.016844	0.513491
peak_43326	chr20	26853008	26853383	chr20:26853008_26853383	-663139	MIR663AHG	Distal Intergenic	1.3036	2.36813	5.71768	0.0167949	0.513491
peak_51338	chr3	160368390	160369198	chr3:160368390_160369198	-25750	ARL14	Distal Intergenic	1.05427	2.65096	5.71512	0.0168194	0.513491
peak_51361	chr3	161406717	161407043	chr3:161406717_161407043	192121	OTOL1	Distal Intergenic	-0.367609	6.32853	5.72241	0.0167498	0.513491
peak_46794	chr22	29267295	29269200	chr22:29267295_29269200	-10555	ZNRF3	Distal Intergenic	1.07639	2.19564	5.70526	0.0169141	0.514868
peak_35573	chr19	41917975	41918262	chr19:41917975_41918262	-14719	EXOSC5	Intron	0.657797	3.67259	5.69908	0.0169738	0.516182
peak_40560	chr2	159921579	159922395	chr2:159921579_159922395	96433	TANC1	Intron	0.764954	2.32754	5.69331	0.0170297	0.516954
peak_41282	chr2	191064701	191064985	chr2:191064701_191064985	62215	C2orf88	3' UTR	-0.348314	5.81442	5.69295	0.0170332	0.516954
peak_49547	chr3	66499975	66501796	chr3:66499975_66501796	49049	LRIG1	Intron	0.943698	2.5154	5.69134	0.0170488	0.516954
peak_60219	chr6	33317698	33318339	chr6:33317698_33318339	229731	BAK1	Distal Intergenic	0.879382	2.54468	5.68495	0.017111	0.518338
peak_35722	chr19	45104825	45105065	chr19:45104825_45105065	-11875	IGSF23	Distal Intergenic	0.503005	4.60756	5.67953	0.0171639	0.519437
peak_53993	chr4	108346275	108346524	chr4:108346275_108346524	-141429	DKK2	Distal Intergenic	-0.343305	6.62609	5.66687	0.0172883	0.522694
peak_71968	chr9	44581670	44583839	chr9:44581670_44583839	-406397	FAM27C	Distal Intergenic	-0.917673	2.91397	5.66459	0.0173107	0.522868
peak_52334	chr4	2468126	2470160	chr4:2468126_2470160	-635	RNF4	Promoter	-0.67207	3.35401	5.66275	0.0173289	0.522911
peak_23928	chr15	72461564	72462847	chr15:72461564_72462847	27289	GRAMD2A	Exon	0.970131	2.66724	5.66093	0.0173469	0.52295
peak_55176	chr5	12794517	12795189	chr5:12794517_12795189	219548	LINC01194	Intron	-2.08134	3.69803	5.65742	0.0173817	0.523494
peak_40725	chr2	168583092	168583681	chr2:168583092_168583681	-91501	B3GALT1	Distal Intergenic	1.33506	2.88339	5.65494	0.0174063	0.52373
peak_42085	chr2	221726481	221727939	chr2:221726481_221727939	709071	EPHA4	Distal Intergenic	1.99292	7.83362	5.65259	0.0174296	0.523928
peak_69581	chr8	89718186	89719072	chr8:89718186_89719072	-378469	MMP16	Distal Intergenic	0.743862	2.80896	5.65066	0.0174488	0.523996
peak_49569	chr3	67683446	67683965	chr3:67683446_67683965	21073	SUCLG2	Intron	0.936936	2.12061	5.64899	0.0174654	0.523996
peak_4091	chr1	123857177	123857388	chr1:123857177_123857388	2596267	EMBP1	Distal Intergenic	1.48872	2.73554	5.64706	0.0174847	0.524072
peak_67324	chr7	139767146	139768917	chr7:139767146_139768917	-3625	PARP12	Distal Intergenic	0.993215	3.9597	5.64241	0.017531	0.524958
peak_58603	chr5	157890682	157891427	chr5:157890682_157891427	-604499	CLINT1	Distal Intergenic	0.956974	3.04654	5.63714	0.0175839	0.526037
peak_57433	chr5	100498257	100498542	chr5:100498257_100498542	-259270	ST8SIA4	Distal Intergenic	0.866623	2.40683	5.6344	0.0176114	0.526059
peak_71019	chr9	18255200	18255490	chr9:18255200_18255490	-218589	ADAMTSL1	Distal Intergenic	0.751803	2.45423	5.63371	0.0176183	0.52606
peak_25933	chr16	29228187	29228661	chr16:29228187_29228661	-74167	SNX29P2	Intron	0.80229	2.24803	5.62257	0.0177306	0.527446
peak_57593	chr5	112757472	112758061	chr5:112757472_112758061	12667	TSSK1B	Intron	-0.429731	7.05433	5.61908	0.017766	0.527446
peak_62927	chr6	159999287	159999811	chr6:159999287_159999811	114542	SOD2	Distal Intergenic	1.12005	2.17146	5.62147	0.0177418	0.527446
peak_73397	chr9	125234989	125235767	chr9:125234989_125235767	4438	OR1J1	Intron	1.13431	2.77787	5.62347	0.0177215	0.527446
peak_73696	chr9	131124855	131126346	chr9:131124855_131126346	-7252	URM1	Distal Intergenic	2.26721	2.76911	5.62582	0.0176978	0.527446
peak_75082	chrX	41441838	41443008	chrX:41441838_41443008	-105218	GPR34	Intron	-0.510115	5.36236	5.61946	0.0177621	0.527446
peak_50244	chr3	106068784	106069019	chr3:106068784_106069019	-480518	CBLB	Distal Intergenic	-0.574312	4.98762	5.61663	0.0177909	0.527683
peak_40645	chr2	162063575	162064314	chr2:162063575_162064314	70109	TANK	Intron	0.778274	2.92987	5.61422	0.0178153	0.527908
peak_43911	chr20	34580286	34580621	chr20:34580286_34580621	23757	CNBD2	Intron	1.63762	2.17834	5.60633	0.0178957	0.529285
peak_62326	chr6	139490371	139490774	chr6:139490371_139490774	34122	HECA	Intron	-0.718033	3.13031	5.60653	0.0178936	0.529285
peak_57184	chr5	81514098	81514595	chr5:81514098_81514595	59640	RPS23	Intron	-1.72828	3.70398	5.60242	0.0179357	0.529968
peak_66901	chr7	116984771	116985289	chr7:116984771_116985289	-21428	WNT2	Distal Intergenic	1.13566	3.24979	5.59766	0.0179845	0.530908
peak_35717	chr19	45075342	45076736	chr19:45075342_45076736	-15192	CEACAM22P	Distal Intergenic	-0.711333	3.85884	5.58999	0.0180634	0.532734
peak_15058	chr12	22160505	22160860	chr12:22160505_22160860	-38250	CMAS	Distal Intergenic	1.7582	9.49361	5.58427	0.0181225	0.533973
peak_9495	chr10	72254569	72255489	chr10:72254569_72255489	16005	PALD1	Intron	1.57826	4.86436	5.58137	0.0181525	0.534076
peak_69696	chr8	97649180	97649504	chr8:97649180_97649504	-7995	CPQ	Distal Intergenic	2.09629	2.89046	5.58063	0.0181602	0.534076
peak_61060	chr6	63643610	63644279	chr6:63643610_63644279	385603	LGSN	Distal Intergenic	0.641601	3.76396	5.57526	0.0182159	0.535212
peak_73289	chr9	121193065	121193540	chr9:121193065_121193540	726612	TLR4	Distal Intergenic	-0.342183	6.30752	5.5712	0.0182582	0.535951
peak_27243	chr16	89166028	89166488	chr16:89166028_89166488	5811	ACSF3	Intron	0.655714	3.27842	5.56904	0.0182808	0.536111
peak_8088	chr10	17241575	17242226	chr10:17241575_17242226	1844	TRDMT1	Intron	0.791194	3.32972	5.56529	0.01832	0.536757
peak_60747	chr6	45674707	45675280	chr6:45674707_45675280	-328919	SUPT3H	Distal Intergenic	0.508822	5.63406	5.56355	0.0183382	0.536788
peak_67004	chr7	128409148	128410837	chr7:128409148_128410837	5007	OPN1SW	3' UTR	-0.387451	5.44409	5.56073	0.0183677	0.537149
peak_47241	chr22	39914764	39914989	chr22:39914764_39914989	-1580	ATF4	Promoter	1.09557	2.46098	5.54726	0.0185096	0.540792
peak_58539	chr5	157158992	157160309	chr5:157158992_157160309	669	THG1L	5' UTR	0.730201	3.82395	5.54408	0.0185433	0.54127
peak_48325	chr3	17774346	17775374	chr3:17774346_17775374	8866	TBC1D5	Intron	0.587458	4.11815	5.53335	0.0186574	0.543586
peak_67158	chr7	132394258	132394737	chr7:132394258_132394737	60705	FLJ40288	Intron	-0.357642	6.3308	5.53476	0.0186423	0.543586
peak_38729	chr2	85637379	85638093	chr2:85637379_85638093	3104	CAPG	5' UTR	2.00156	8.16969	5.53052	0.0186876	0.543958
peak_74837	chrX	19826603	19827728	chrX:19826603_19827728	78016	SH3KBP1	Intron	-0.524564	4.53474	5.52521	0.0187444	0.545104
peak_66777	chr7	108001419	108001664	chr7:108001419_108001664	95177	NRCAM	Intron	0.692009	3.27345	5.5186	0.0188153	0.545137
peak_72110	chr9	45242663	45243500	chr9:45242663_45243500	252427	FAM27C	Distal Intergenic	1.25469	9.92092	5.52027	0.0187973	0.545137
peak_20130	chr14	21218544	21218747	chr14:21218544_21218747	4445	EDDM3A	Distal Intergenic	1.10279	2.85835	5.52076	0.018792	0.545137
peak_46290	chr22	17280297	17280860	chr22:17280297_17280860	21724	XKR3	Exon	1.05413	2.18896	5.51946	0.0188061	0.545137
peak_33576	chr19	13234172	13235142	chr19:13234172_13235142	5070	NACC1	Intron	1.80154	2.58846	5.51345	0.0188708	0.54624
peak_68466	chr8	22140814	22142252	chr8:22140814_22142252	8004	PIWIL2	Exon	-0.671385	4.07037	5.51145	0.0188924	0.546359
peak_65058	chr7	36795270	36795825	chr7:36795270_36795825	-31116	AOAH	Distal Intergenic	-0.298637	6.19556	5.50548	0.018957	0.547293
peak_72993	chr9	101533125	101534445	chr9:101533125_101534445	24349	ANKS6	Exon	1.98007	3.06736	5.50523	0.0189597	0.547293
peak_60903	chr6	58682787	58683229	chr6:58682787_58683229	-395063	GUSBP4	Distal Intergenic	-0.278773	6.23043	5.48722	0.019156	0.547484
peak_64666	chr7	19773098	19773495	chr7:19773098_19773495	-24438	TWISTNB	Intron	-0.376177	6.02261	5.48435	0.0191874	0.547484
peak_65238	chr7	44145081	44146874	chr7:44145081_44146874	1121	AEBP1	Exon	0.719872	5.93182	5.48444	0.0191865	0.547484
peak_72845	chr9	95981599	95982407	chr9:95981599_95982407	34387	WNK2	Intron	1.91662	3.46324	5.49388	0.0190831	0.547484
peak_74553	chrX	1648537	1648997	chrX:1648537_1648997	884391	LINC00102	Intron	-0.386054	5.81547	5.49422	0.0190795	0.547484
peak_29078	chr17	42067267	42067692	chr17:42067267_42067692	14145	PYY	Intron	1.9126	2.75683	5.48374	0.0191941	0.547484
peak_31857	chr18	31819595	31819854	chr18:31819595_31819854	-16080	NOL4	Distal Intergenic	-0.750259	2.84192	5.48176	0.0192159	0.547484
peak_42092	chr2	222701747	222702066	chr2:222701747_222702066	-264737	EPHA4	Distal Intergenic	-0.728834	3.32818	5.49972	0.0190196	0.547484
peak_44285	chr20	45987095	45987863	chr20:45987095_45987863	-1621	ZMYND8	Promoter	0.752934	3.16704	5.47939	0.019242	0.547484
peak_47507	chr22	45129792	45130325	chr22:45129792_45130325	-18113	ARHGAP8	Intron	-0.256581	7.24848	5.48184	0.019215	0.547484
peak_52554	chr4	9522857	9523205	chr4:9522857_9523205	34732	MIR548I2	Distal Intergenic	0.79784	2.57379	5.47898	0.0192465	0.547484
peak_55311	chr5	31973099	31973586	chr5:31973099_31973586	-36834	MIR4279	Intron	-0.875437	2.52181	5.4827	0.0192056	0.547484
peak_55525	chr5	40686143	40686864	chr5:40686143_40686864	6111	PTGER4	Intron	0.859716	2.1111	5.49504	0.0190705	0.547484
peak_56169	chr5	48843462	48844491	chr5:48843462_48844491	892743	EMB	Distal Intergenic	0.702784	2.71312	5.48368	0.0191949	0.547484
peak_56311	chr5	49220282	49220863	chr5:49220282_49220863	516371	EMB	Distal Intergenic	1.38781	2.30915	5.49201	0.0191035	0.547484
peak_57823	chr5	131373068	131373563	chr5:131373068_131373563	-22784	IL3	Distal Intergenic	0.80178	2.70764	5.49288	0.019094	0.547484
peak_26140	chr16	32832772	32833046	chr16:32832772_32833046	63417	SLC6A10P	Distal Intergenic	0.943062	2.81523	5.46974	0.0193485	0.549884
peak_35480	chr19	40634469	40635014	chr19:40634469_40635014	-37624	ZNF780A	Distal Intergenic	0.804305	3.63772	5.46566	0.0193937	0.549894
peak_38071	chr2	54657720	54657947	chr2:54657720_54657947	-25507	SPTBN1	Distal Intergenic	0.897391	2.44384	5.46495	0.0194016	0.549894
peak_44170	chr20	43744201	43744430	chr20:43744201_43744430	-388	WFDC5	Promoter	0.838552	2.65989	5.46548	0.0193958	0.549894
peak_33206	chr19	7829164	7830591	chr19:7829164_7830591	1129	CLEC4M	Exon	1.38686	2.81195	5.46275	0.019426	0.549948
peak_41407	chr2	196251151	196251403	chr2:196251151_196251403	-270129	SLC39A10	Distal Intergenic	1.75437	8.59827	5.46161	0.0194387	0.549948
peak_65377	chr7	50449553	50451405	chr7:50449553_50451405	66683	FIGNL1	Exon	1.2446	2.49699	5.45635	0.0194973	0.551107
peak_69937	chr8	115568856	115569421	chr8:115568856_115569421	1111807	TRPS1	Distal Intergenic	-0.321636	6.70678	5.45452	0.0195178	0.551188
peak_67383	chr7	141654486	141655074	chr7:141654486_141655074	-7703	CLEC5A	Distal Intergenic	-0.834375	3.13028	5.45228	0.0195428	0.551395
peak_52599	chr4	11480548	11481138	chr4:11480548_11481138	-50011	HS3ST1	Distal Intergenic	0.84028	2.40924	5.44926	0.0195766	0.551852
peak_54594	chr4	153683740	153685394	chr4:153683740_153685394	15522	TIGD4	Distal Intergenic	2.01187	3.34329	5.4469	0.0196031	0.5521
peak_54784	chr4	174282830	174284702	chr4:174282830_174284702	-7391	SAP30	Distal Intergenic	1.2789	2.60707	5.44506	0.0196237	0.552184
peak_16324	chr12	55068408	55068680	chr12:55068408_55068680	-26259	DCD	Distal Intergenic	1.42593	2.90419	5.42987	0.0197951	0.556506
peak_67456	chr7	143279100	143280426	chr7:143279100_143280426	10206	CTAGE15	Distal Intergenic	-0.289888	6.21021	5.42471	0.0198537	0.55765
peak_4049	chr1	123744891	123745473	chr1:123744891_123745473	2483981	EMBP1	Distal Intergenic	1.42924	3.27316	5.42315	0.0198715	0.55765
peak_61327	chr6	90049374	90049612	chr6:90049374_90049612	13007	UBE2J1	Intron	1.17646	4.70461	5.41259	0.0199921	0.560029
peak_52497	chr4	7854520	7855881	chr4:7854520_7855881	85772	AFAP1	Intron	1.31898	2.87954	5.41357	0.0199808	0.560029
peak_29390	chr17	47850683	47851548	chr17:47850683_47851548	14389	FAM117A	Intron	1.0132	2.57993	5.41072	0.0200135	0.560127
peak_59870	chr6	25014909	25015948	chr6:25014909_25015948	26450	RIPOR2	Intron	-0.497376	6.45179	5.40879	0.0200355	0.560243
peak_66076	chr7	74908522	74908913	chr7:74908522_74908913	-41181	CASTOR2	Intron	0.865246	2.36469	5.40466	0.020083	0.561069
peak_32893	chr19	3177775	3180289	chr19:3177775_3180289	0	S1PR4	Promoter	0.873907	2.56054	5.39816	0.020158	0.562659
peak_61904	chr6	125769510	125770465	chr6:125769510_125770465	-146228	HDDC2	Distal Intergenic	-1.01471	4.68002	5.39446	0.0202008	0.563351
peak_30037	chr17	65678122	65678950	chr17:65678122_65678950	-35111	NOL11	Intron	1.49943	2.10455	5.39162	0.0202337	0.563767
peak_33209	chr19	7862002	7863862	chr19:7862002_7863862	9632	CLEC4GP1	Distal Intergenic	-0.391676	5.31529	5.38419	0.0203201	0.564984
peak_35566	chr19	41882574	41884773	chr19:41882574_41884773	136	BCKDHA	5' UTR	0.736558	3.41292	5.38009	0.0203678	0.564984
peak_41784	chr2	206693578	206694067	chr2:206693578_206694067	146354	NRP2	Distal Intergenic	1.53914	6.33508	5.38034	0.0203649	0.564984
peak_45484	chr21	33901492	33902069	chr21:33901492_33902069	55776	TCP10L	Distal Intergenic	0.762838	2.26303	5.38089	0.0203584	0.564984
peak_71222	chr9	33165610	33168578	chr9:33165610_33168578	0	B4GALT1	Promoter	1.03884	2.55437	5.38319	0.0203317	0.564985
peak_53690	chr4	88007016	88008804	chr4:88007016_88008804	132870	KLHL8	Intron	1.6152	3.04568	5.37805	0.0203917	0.565146
peak_54687	chr4	165206877	165208567	chr4:165206877_165208567	-88014	ANP32C	Intron	0.761474	2.21073	5.37506	0.0204267	0.565615
peak_17435	chr12	108631865	108632269	chr12:108631865_108632269	100825	CMKLR1	Intron	1.26676	2.51467	5.36419	0.0205543	0.566099
peak_22575	chr15	18522931	18523714	chr15:18522931_18523714	-1964283	CHEK2P2	Distal Intergenic	0.771138	2.37404	5.36248	0.0205745	0.566099
peak_24650	chr15	96356613	96357396	chr15:96356613_96357396	380291	LINC00924	Distal Intergenic	1.43611	2.93822	5.35971	0.0206072	0.566099
peak_33613	chr19	13983084	13983774	chr19:13983084_13983774	-1739	MIR181C	Promoter	1.95232	7.88996	5.36205	0.0205795	0.566099
peak_35738	chr19	45398003	45399047	chr19:45398003_45399047	3526	TOMM40	Intron	0.761435	2.72563	5.36489	0.0205461	0.566099
peak_35775	chr19	45691630	45693544	chr19:45691630_45693544	9627	BLOC1S3	Distal Intergenic	-2.00686	3.19698	5.35999	0.0206039	0.566099
peak_57110	chr5	80139665	80140694	chr5:80139665_80140694	-115814	RASGRF2	Intron	-0.552572	4.61948	5.3702	0.0204836	0.566099
peak_70495	chr8	142864981	142865435	chr8:142864981_142865435	-347651	MROH5	Distal Intergenic	2.41868	4.72829	5.36966	0.02049	0.566099
peak_73554	chr9	128494250	128495064	chr9:128494250_128495064	-14553	PBX3	Distal Intergenic	-0.286399	6.23626	5.36355	0.0205619	0.566099
peak_4988	chr1	154406869	154408388	chr1:154406869_154408388	29200	IL6R	Exon	1.56534	2.55012	5.35074	0.0207135	0.567969
peak_55786	chr5	47788863	47789487	chr5:47788863_47789487	1947747	EMB	Distal Intergenic	0.856118	2.46479	5.35193	0.0206994	0.567969
peak_75749	chrX	100924182	100924868	chrX:100924182_100924868	-9319	ARMCX2	Distal Intergenic	-0.558974	3.91829	5.34937	0.0207297	0.56797
peak_46521	chr22	21165922	21168273	chr22:21165922_21168273	37539	SERPIND1	Exon	0.838867	2.33827	5.34774	0.0207491	0.568002
peak_30345	chr17	75426069	75426929	chr17:75426069_75426929	-32933	MIR4316	Intron	0.740884	2.82609	5.3449	0.020783	0.568433
peak_28336	chr17	21816197	21816570	chr17:21816197_21816570	-8800	FAM27E5	Distal Intergenic	0.673019	3.23259	5.33944	0.0208481	0.569715
peak_56054	chr5	48523942	48524213	chr5:48523942_48524213	1213021	EMB	Distal Intergenic	0.797552	3.24622	5.33484	0.0209032	0.570224
peak_56103	chr5	48651218	48651429	chr5:48651218_48651429	1085805	EMB	Distal Intergenic	-0.592035	4.13957	5.3352	0.020899	0.570224
peak_60845	chr6	53547499	53548715	chr6:53547499_53548715	-16993	KLHL31	Distal Intergenic	0.544599	4.51957	5.32515	0.0210198	0.572905
peak_55573	chr5	43389664	43390188	chr5:43389664_43390188	22300	CCL28	Intron	0.845766	2.91739	5.32295	0.0210463	0.573128
peak_57401	chr5	97489195	97489415	chr5:97489195_97489415	-615584	RGMB	Distal Intergenic	-3.48418	2.15987	5.32132	0.0210661	0.573166
peak_29967	chr17	64498450	64499180	chr17:64498450_64499180	199524	PRKCA	Intron	-0.922551	3.28602	5.31444	0.0211493	0.574931
peak_58788	chr5	172806785	172807940	chr5:172806785_172807940	-50279	STC2	Distal Intergenic	1.0094	4.84283	5.30272	0.0212922	0.578312
peak_67877	chr7	158783064	158784457	chr7:158783064_158784457	-16588	LINC00689	Distal Intergenic	0.683641	3.36514	5.29933	0.0213336	0.578372
peak_22890	chr15	33194315	33195559	chr15:33194315_33195559	184110	GREM1	Intron	0.817142	2.96633	5.29656	0.0213675	0.578372
peak_45701	chr21	39974577	39975085	chr21:39974577_39975085	58619	ERG	Intron	1.97921	6.95871	5.29684	0.0213642	0.578372
peak_58179	chr5	140351467	140352162	chr5:140351467_140352162	5720	PCDHAC2	Intron	-0.786128	4.69266	5.29649	0.0213684	0.578372
peak_75584	chrX	72245257	72245736	chrX:72245257_72245736	21905	PABPC1L2B	Distal Intergenic	1.66353	3.55508	5.28668	0.0214891	0.579132
peak_76353	chrX	150625918	150626284	chrX:150625918_150626284	60261	VMA21	Distal Intergenic	-0.358543	6.08656	5.28779	0.0214755	0.579132
peak_39177	chr2	93232621	93232841	chr2:93232621_93232841	1103462	ACTR3BP2	Distal Intergenic	2.10355	5.74145	5.28807	0.021472	0.579132
peak_46514	chr22	21045100	21046331	chr22:21045100_21046331	1257	POM121L4P	3' UTR	-0.354966	6.84989	5.29013	0.0214467	0.579132
peak_52279	chr4	1520699	1520984	chr4:1520699_1520984	135359	CRIPAK	Distal Intergenic	1.77401	3.40795	5.29138	0.0214312	0.579132
peak_47000	chr22	36364812	36365616	chr22:36364812_36365616	58969	RBFOX2	Intron	0.890352	2.21138	5.28227	0.0215437	0.580102
peak_39757	chr2	109000802	109001094	chr2:109000802_109001094	6381	SULT1C4	Intron	0.662135	3.21038	5.27951	0.0215779	0.580523
peak_49445	chr3	59473708	59473912	chr3:59473708_59473912	-437950	C3orf67	Distal Intergenic	0.753406	2.189	5.27302	0.0216584	0.582187
peak_59601	chr6	14210522	14211898	chr6:14210522_14211898	93035	CD83	Distal Intergenic	-0.274975	6.41271	5.27039	0.0216912	0.582569
peak_54559	chr4	153179607	153179831	chr4:153179607_153179831	230737	MIR3140	Distal Intergenic	0.909197	2.19352	5.26365	0.0217754	0.583326
peak_62201	chr6	136647226	136647851	chr6:136647226_136647851	-36237	BCLAF1	Distal Intergenic	1.31692	2.36526	5.26637	0.0217414	0.583326
peak_72537	chr9	83803968	83804488	chr9:83803968_83804488	499108	TLE1	Distal Intergenic	-0.815275	2.62722	5.26414	0.0217691	0.583326
peak_70322	chr8	133056870	133059312	chr8:133056870_133059312	12315	OC90	Exon	-0.408465	5.06035	5.25137	0.0219295	0.586951
peak_61460	chr6	101010902	101011887	chr6:101010902_101011887	-98097	SIM1	Intron	0.875018	2.53217	5.24682	0.0219869	0.587985
peak_75309	chrX	52919973	52921992	chrX:52919973_52921992	-4434	FAM156B	Distal Intergenic	1.41307	2.8134	5.23871	0.0220897	0.588698
peak_36430	chr19	57239976	57241534	chr19:57239976_57241534	-56853	ZNF835	Intron	0.858595	2.58582	5.23286	0.022164	0.588698
peak_46862	chr22	30634384	30636784	chr22:30634384_30636784	6056	LIF	3' UTR	0.727913	3.93842	5.23671	0.022115	0.588698
peak_50710	chr3	128316150	128317536	chr3:128316150_128317536	-21221	LINC01565	Distal Intergenic	0.770739	2.19489	5.23445	0.0221438	0.588698
peak_53586	chr4	82284148	82285746	chr4:82284148_82285746	107315	RASGEF1B	Distal Intergenic	0.804997	2.28781	5.2389	0.0220873	0.588698
peak_56067	chr5	48561307	48561905	chr5:48561307_48561905	1175329	EMB	Distal Intergenic	0.411986	5.01636	5.23703	0.022111	0.588698
peak_56642	chr5	56586078	56589501	chr5:56586078_56589501	116303	GPBP1	Distal Intergenic	0.963815	2.54589	5.23661	0.0221163	0.588698
peak_58569	chr5	157295208	157295564	chr5:157295208_157295564	-9025	CLINT1	Distal Intergenic	-0.442657	6.21132	5.23167	0.0221793	0.588698
peak_59233	chr6	1533992	1534851	chr6:1533992_1534851	-75830	FOXC1	Distal Intergenic	0.844439	2.16865	5.23137	0.022183	0.588698
peak_40998	chr2	176454953	176455296	chr2:176454953_176455296	-408463	ATP5MC3	Distal Intergenic	1.17166	2.37447	5.22588	0.0222532	0.5887
peak_42638	chr2	240565385	240569345	chr2:240565385_240569345	-115209	LOC150935	Distal Intergenic	0.704871	2.97514	5.22804	0.0222255	0.5887
peak_42884	chr20	3238040	3240318	chr20:3238040_3240318	-18153	SLC4A11	Exon	1.27496	2.20677	5.22606	0.0222508	0.5887
peak_72095	chr9	45137810	45138161	chr9:45137810_45138161	147574	FAM27C	Distal Intergenic	-1.19415	3.45861	5.22547	0.0222584	0.5887
peak_53970	chr4	108135372	108136123	chr4:108135372_108136123	68723	DKK2	Intron	0.794952	3.07152	5.22364	0.0222819	0.588823
peak_73785	chr9	132877881	132879353	chr9:132877881_132879353	-55504	NCS1	Intron	-0.313757	6.04624	5.22215	0.022301	0.58883
peak_62055	chr6	131293434	131293957	chr6:131293434_131293957	90505	EPB41L2	Intron	1.00817	2.37827	5.21781	0.0223568	0.589803
peak_65586	chr7	59082666	59083107	chr7:59082666_59083107	1572783	ZNF716	Distal Intergenic	-0.492762	6.36408	5.21607	0.0223791	0.589895
peak_50768	chr3	129112438	129112783	chr3:129112438_129112783	3408	SNORA7B	3' UTR	0.687527	2.85669	5.2135	0.0224122	0.590269
peak_26791	chr16	72124649	72125323	chr16:72124649_72125323	-2292	DHX38	Promoter	0.89793	2.27063	5.20505	0.0225214	0.59223
peak_69589	chr8	89781752	89782622	chr8:89781752_89782622	-442035	MMP16	Distal Intergenic	-1.87092	2.43936	5.20481	0.0225245	0.59223
peak_73386	chr9	124965289	124966498	chr9:124965289_124966498	24593	LHX6	3' UTR	-0.302501	6.37354	5.20108	0.0225728	0.593001
peak_61791	chr6	116645495	116645980	chr6:116645495_116645980	-44215	TSPYL1	Intron	-0.566414	4.57261	5.19821	0.0226102	0.593259
peak_27940	chr17	8867351	8868081	chr17:8867351_8868081	948	PIK3R5	Intron	0.936106	2.36537	5.19741	0.0226206	0.593259
peak_18101	chr12	131958057	131958553	chr12:131958057_131958553	-237079	SFSWAP	Distal Intergenic	-0.781573	2.7418	5.19168	0.0226952	0.594718
peak_26020	chr16	30223061	30225626	chr16:30223061_30225626	-4813	LOC613038	Distal Intergenic	0.749661	3.44713	5.18815	0.0227414	0.594722
peak_65137	chr7	39453704	39454161	chr7:39453704_39454161	-7759	POU6F2-AS1	Intron	-0.335687	5.43161	5.18903	0.0227299	0.594722
peak_68261	chr8	11782549	11783729	chr8:11782549_11783729	48379	DEFB136	Distal Intergenic	-0.329012	5.64726	5.18731	0.0227525	0.594722
peak_71093	chr9	21001608	21002591	chr9:21001608_21002591	29044	HACD4	Downstream	-0.628428	4.39725	5.1853	0.0227787	0.594911
peak_60796	chr6	52341910	52342330	chr6:52341910_52342330	56916	EFHC1	Intron	0.749777	3.03046	5.1737	0.0229314	0.595092
peak_64835	chr7	26291384	26292418	chr7:26291384_26292418	-39097	SNX10	Distal Intergenic	-0.489354	5.41464	5.18251	0.0228154	0.595092
peak_10779	chr10	132521954	132522267	chr10:132521954_132522267	238664	MIR378C	Distal Intergenic	-0.59403	5.29941	5.16699	0.0230201	0.595092
peak_47537	chr22	45878439	45879138	chr22:45878439_45879138	-19581	FBLN1	Distal Intergenic	-0.866328	2.66437	5.18025	0.0228451	0.595092
peak_48439	chr3	23888583	23888812	chr3:23888583_23888812	41199	UBE2E1	Intron	0.856385	2.157	5.17157	0.0229595	0.595092
peak_49369	chr3	56877836	56878614	chr3:56877836_56878614	-95454	ARHGEF3-AS1	Intron	1.73267	3.57583	5.16601	0.0230331	0.595092
peak_50048	chr3	93017073	93017293	chr3:93017073_93017293	675641	PROS1	Distal Intergenic	1.82882	2.09314	5.16635	0.0230286	0.595092
peak_51722	chr3	185585571	185587185	chr3:185585571_185587185	-42744	IGF2BP2	Distal Intergenic	-0.337222	7.17278	5.17583	0.0229033	0.595092
peak_54625	chr4	156759480	156760096	chr4:156759480_156760096	27329	ASIC5	Exon	0.722544	2.69236	5.17914	0.0228596	0.595092
peak_54804	chr4	177249999	177250516	chr4:177249999_177250516	8909	SPCS3	3' UTR	0.829723	2.87705	5.17324	0.0229375	0.595092
peak_55142	chr5	7816128	7816565	chr5:7816128_7816565	35038	C5orf49	Intron	0.788577	2.99995	5.16761	0.0230118	0.595092
peak_55350	chr5	34021869	34022548	chr5:34021869_34022548	-13649	AMACR	Intron	0.881591	2.26674	5.17285	0.0229426	0.595092
peak_56546	chr5	55141857	55142363	chr5:55141857_55142363	-4844	IL31RA	Distal Intergenic	-0.787911	3.17735	5.17552	0.0229073	0.595092
peak_72380	chr9	71910034	71912159	chr9:71910034_71912159	9813	BANCR	Exon	-0.328747	5.84311	5.15869	0.0231303	0.595635
peak_75304	chrX	51892829	51895307	chrX:51892829_51895307	-80461	MAGED4B	Distal Intergenic	-0.513603	4.3161	5.16298	0.0230733	0.595635
peak_76349	chrX	150568040	150569661	chrX:150568040_150569661	2383	VMA21	Intron	-1.74514	4.20125	5.1594	0.0231209	0.595635
peak_53770	chr4	95139475	95139799	chr4:95139475_95139799	10716	SMARCAD1	Intron	1.63382	2.15189	5.16065	0.0231042	0.595635
peak_52632	chr4	15653605	15654073	chr4:15653605_15654073	2962	FBXL5	Intron	-0.251844	7.72893	5.15295	0.0232069	0.597114
peak_74819	chrX	19678821	19679295	chrX:19678821_19679295	-145442	MAP3K15	Intron	1.51574	3.20086	5.15075	0.0232364	0.597382
peak_21527	chr14	89240448	89241124	chr14:89240448_89241124	17972	EML5	Intron	-0.351556	7.39884	5.14543	0.0233076	0.597892
peak_38856	chr2	88016040	88017607	chr2:88016040_88017607	261066	CYTOR	Intron	0.776751	2.18995	5.14732	0.0232823	0.597892
peak_52039	chr3	196461932	196462446	chr3:196461932_196462446	-4282	PAK2	3' UTR	1.00141	2.51336	5.14498	0.0233136	0.597892
peak_65330	chr7	50167171	50167981	chr7:50167171_50167981	31489	SPATA48	Intron	-0.726573	2.758	5.14158	0.0233594	0.598053
peak_14798	chr12	10243945	10244248	chr12:10243945_10244248	7357	CLEC1A	Intron	0.696532	4.13814	5.14041	0.0233751	0.598053
peak_25060	chr16	1289056	1289293	chr16:1289056_1289293	-1385	TPSAB1	Promoter	0.758785	2.89795	5.13969	0.0233849	0.598053
peak_37245	chr2	12710437	12710835	chr2:12710437_12710835	-146163	TRIB2	Intron	0.766956	2.24236	5.13883	0.0233964	0.598053
peak_55401	chr5	35884157	35885049	chr5:35884157_35885049	27180	IL7R	Distal Intergenic	1.10388	2.48714	5.1348	0.0234508	0.598955
peak_46166	chr22	13229109	13229431	chr22:13229109_13229431	3058506	POTEH	Distal Intergenic	0.36267	5.42084	5.13177	0.0234918	0.599021
peak_70220	chr8	127975498	127977070	chr8:127975498_127977070	-48329	PCAT1	Distal Intergenic	-0.278756	6.69034	5.13242	0.023483	0.599021
peak_16812	chr12	75389220	75389998	chr12:75389220_75389998	213530	KCNC2	Distal Intergenic	0.79544	3.4537	5.11068	0.023779	0.60054
peak_30246	chr17	74012193	74012891	chr17:74012193_74012891	10616	EVPL	Intron	0.677359	3.16654	5.12241	0.0236188	0.60054
peak_35878	chr19	47130234	47131639	chr19:47130234_47131639	-1880	PTGIR	Promoter	0.949151	2.33331	5.11243	0.0237551	0.60054
peak_38246	chr2	64049287	64050290	chr2:64049287_64050290	-17808	UGP2	Distal Intergenic	0.974102	2.41839	5.11694	0.0236933	0.60054
peak_43253	chr20	26474212	26475121	chr20:26474212_26475121	-284343	MIR663AHG	Distal Intergenic	0.843299	2.11966	5.11423	0.0237304	0.60054
peak_51663	chr3	183815176	183816160	chr3:183815176_183816160	324	HTR3E	5' UTR	-0.246982	7.29996	5.12021	0.0236487	0.60054
peak_56569	chr5	55678078	55678355	chr5:55678078_55678355	-148892	ANKRD55	Distal Intergenic	-0.288158	6.78725	5.11672	0.0236964	0.60054
peak_56655	chr5	56711271	56711585	chr5:56711271_56711585	67051	ACTBL2	Distal Intergenic	-1.1311	3.56298	5.11705	0.0236918	0.60054
peak_8008	chr10	14582944	14584185	chr10:14582944_14584185	-78801	FRMD4A	Intron	0.720979	2.79498	5.12497	0.0235839	0.60054
peak_65967	chr7	70681692	70682869	chr7:70681692_70682869	84169	GALNT17	Intron	0.651078	3.23986	5.11377	0.0237367	0.60054
peak_70274	chr8	130201160	130201841	chr8:130201160_130201841	51645	LINC00977	Distal Intergenic	-0.391765	5.77034	5.12141	0.0236324	0.60054
peak_73463	chr9	127417954	127418543	chr9:127417954_127418543	-2172	MIR181A2HG	Promoter	0.269058	6.84361	5.11047	0.0237819	0.60054
peak_46219	chr22	14722832	14723349	chr22:14722832_14723349	1564588	POTEH	Distal Intergenic	-0.583667	4.19464	5.10222	0.0238953	0.601945
peak_60914	chr6	58823316	58823595	chr6:58823316_58823595	-535592	GUSBP4	Distal Intergenic	0.714154	2.76836	5.10291	0.0238858	0.601945
peak_64742	chr7	23373149	23373617	chr7:23373149_23373617	34209	MALSU1	Intron	-0.244755	6.81981	5.1032	0.0238817	0.601945
peak_69328	chr8	70576973	70577422	chr8:70576973_70577422	169877	SLCO5A1	Distal Intergenic	0.553366	4.18134	5.10081	0.0239146	0.601948
peak_23932	chr15	72493046	72493294	chr15:72493046_72493294	-2910	GRAMD2A	Intron	1.72964	8.75249	5.09115	0.0240483	0.604338
peak_52765	chr4	27977927	27978137	chr4:27977927_27978137	-843067	MIR4275	Distal Intergenic	1.59953	2.47783	5.09135	0.0240455	0.604338
peak_64828	chr7	26184668	26185854	chr7:26184668_26185854	-5993	NFE2L3	Distal Intergenic	-0.293526	6.2165	5.08971	0.0240682	0.604352
peak_9541	chr10	73759146	73760025	chr10:73759146_73760025	35026	CHST3	Intron	1.87723	5.39087	5.08006	0.0242025	0.606419
peak_9900	chr10	91378070	91378615	chr10:91378070_91378615	-25486	MIR107	Intron	0.588343	4.33852	5.07773	0.0242351	0.606419
peak_62787	chr6	157536020	157536349	chr6:157536020_157536349	208904	TMEM242	Distal Intergenic	0.658983	4.58472	5.07685	0.0242474	0.606419
peak_51133	chr3	150820028	150821185	chr3:150820028_150821185	16577	MED12L	Intron	0.871529	2.41849	5.07829	0.0242273	0.606419
peak_52610	chr4	13626830	13628475	chr4:13626830_13628475	853	BOD1L1	Exon	0.401907	5.53808	5.0779	0.0242327	0.606419
peak_72584	chr9	87551800	87552104	chr9:87551800_87552104	268334	NTRK2	Intron	-0.270679	6.19711	5.07272	0.0243053	0.607379
peak_67268	chr7	138919947	138920209	chr7:138919947_138920209	3716	UBN2	Intron	-0.27543	6.49097	5.07066	0.024334	0.607612
peak_7948	chr10	13158314	13158795	chr10:13158314_13158795	16232	OPTN	Exon	1.33127	2.64728	5.0633	0.0244376	0.609226
peak_75763	chrX	101596022	101596513	chrX:101596022_101596513	175186	TMSB15A	Distal Intergenic	1.28299	3.13399	5.06331	0.0244375	0.609226
peak_14849	chr12	12008277	12011061	chr12:12008277_12011061	205489	ETV6	Intron	1.76821	4.71728	5.05995	0.024485	0.60968
peak_48478	chr3	27880786	27882178	chr3:27880786_27882178	-116580	EOMES	Distal Intergenic	0.782582	2.11573	5.05925	0.0244948	0.60968
peak_66027	chr7	73725653	73726212	chr7:73725653_73726212	21848	CLIP2	Intron	0.922686	3.47628	5.05183	0.0246	0.61181
peak_42558	chr2	238494120	238494789	chr2:238494120_238494789	4980	RAB17	Exon	-0.244096	7.45347	5.04822	0.0246512	0.612596
peak_62662	chr6	153966048	153966368	chr6:153966048_153966368	-365263	OPRM1	Distal Intergenic	-0.487839	5.64938	5.04528	0.0246932	0.613152
peak_58831	chr5	175517085	175517512	chr5:175517085_175517512	-29040	LOC100507387	Exon	1.45032	2.54119	5.04221	0.0247369	0.613751
peak_64964	chr7	32427810	32428123	chr7:32427810_32428123	69983	LOC100130673	Distal Intergenic	-0.387198	5.31267	5.03857	0.0247889	0.614553
peak_35678	chr19	44207054	44208016	chr19:44207054_44208016	-12198	IRGC	Distal Intergenic	0.575742	5.27186	5.02427	0.0249944	0.617201
peak_48178	chr3	14177783	14179264	chr3:14177783_14179264	11343	TMEM43	3' UTR	0.803794	2.9001	5.0276	0.0249464	0.617201
peak_51845	chr3	188834382	188834667	chr3:188834382_188834667	123716	TPRG1-AS2	Intron	-0.598819	4.68818	5.02432	0.0249937	0.617201
peak_57025	chr5	76556825	76557086	chr5:76556825_76557086	50119	PDE8B	Intron	-0.302507	6.8409	5.02541	0.024978	0.617201
peak_8190	chr10	22649354	22649973	chr10:22649354_22649973	14980	SPAG6	5' UTR	1.24807	2.3614	5.02726	0.0249513	0.617201
peak_7854	chr10	11170116	11170329	chr10:11170116_11170329	-22665	CELF2-AS2	Intron	0.683527	2.47252	5.01977	0.0250595	0.617931
peak_37907	chr2	44237025	44237969	chr2:44237025_44237969	-13881	LRPPRC	Distal Intergenic	1.22461	2.5608	5.01949	0.0250635	0.617931
peak_12664	chr11	66311728	66313573	chr11:66311728_66313573	98	ZDHHC24	Promoter	-0.993281	3.53656	5.008	0.0252304	0.618817
peak_23836	chr15	68781820	68782277	chr15:68781820_68782277	-57328	ITGA11	Distal Intergenic	-0.757345	2.5719	5.00044	0.0253409	0.618817
peak_25195	chr16	3052874	3053543	chr16:3052874_3053543	-8914	CLDN9	Distal Intergenic	0.742271	2.33587	4.99944	0.0253555	0.618817
peak_29968	chr17	64499901	64500681	chr17:64499901_64500681	200975	PRKCA	Intron	1.03636	2.23552	4.99644	0.0253995	0.618817
peak_31247	chr18	2696275	2696643	chr18:2696275_2696643	40389	SMCHD1	Intron	0.532153	4.15016	5.00022	0.0253441	0.618817
peak_34158	chr19	24908923	24909430	chr19:24908923_24909430	-562674	HAVCR1P1	Distal Intergenic	1.46453	2.18101	4.9953	0.0254162	0.618817
peak_37524	chr2	28134527	28135498	chr2:28134527_28135498	-20546	BABAM2-AS1	Intron	0.855121	2.62804	4.99674	0.0253951	0.618817
peak_48910	chr3	43894302	43894534	chr3:43894302_43894534	161927	ABHD5	Distal Intergenic	-0.292022	6.44832	5.01051	0.0251939	0.618817
peak_52811	chr4	37675646	37676455	chr4:37675646_37676455	11544	RELL1	Intron	0.831609	2.81976	5.01279	0.0251607	0.618817
peak_60877	chr6	57089413	57091603	chr6:57089413_57091603	-2312	RAB23	Promoter	-0.355948	6.19523	5.00993	0.0252023	0.618817
peak_62163	chr6	135535838	135536491	chr6:135535838_135536491	33385	MYB	Intron	-0.27599	6.71935	4.99797	0.025377	0.618817
peak_64977	chr7	32904933	32906417	chr7:32904933_32906417	25051	KBTBD2	Intron	-0.264229	6.74579	4.99936	0.0253567	0.618817
peak_67743	chr7	154050490	154050728	chr7:154050490_154050728	466071	DPP6	Intron	0.674789	3.61668	5.00403	0.0252884	0.618817
peak_72322	chr9	69012940	69013343	chr9:69012940_69013343	134511	PGM5P2	Distal Intergenic	-0.274355	6.08807	5.01088	0.0251885	0.618817
peak_75314	chrX	53000567	53001074	chrX:53000567_53001074	74141	FAM156B	Intron	0.889697	3.82271	4.99872	0.0253661	0.618817
peak_75576	chrX	72095000	72095321	chrX:72095000_72095321	68268	FAM226B	Exon	-0.336729	5.6312	5.00017	0.0253448	0.618817
peak_72538	chr9	83816905	83818700	chr9:83816905_83818700	484896	TLE1	Distal Intergenic	1.32569	2.91874	4.99235	0.0254596	0.619392
peak_75007	chrX	40004988	40006879	chrX:40004988_40006879	29703	BCOR	Intron	1.33961	3.32036	4.99068	0.0254842	0.619508
peak_45500	chr21	34092212	34093017	chr21:34092212_34093017	7334	SYNJ1	Intron	0.80237	2.34446	4.98493	0.0255691	0.621088
peak_19199	chr13	52616636	52618142	chr13:52616636_52618142	30113	UTP14C	Distal Intergenic	0.790206	2.20801	4.98329	0.0255933	0.621195
peak_26320	chr16	50693315	50694025	chr16:50693315_50694025	21239	SNX20	Distal Intergenic	0.619312	3.71712	4.97686	0.0256886	0.623023
peak_46425	chr22	19885330	19885974	chr22:19885330_19885974	-42868	RTL10	Exon	1.38421	2.53331	4.97264	0.0257513	0.624059
peak_67310	chr7	139630370	139630586	chr7:139630370_139630586	132935	PARP12	Intron	-1.60959	2.68553	4.96799	0.0258206	0.625143
peak_50489	chr3	115418670	115418891	chr3:115418670_115418891	76519	GAP43	Intron	-0.254069	6.83768	4.96696	0.025836	0.625143
peak_76481	chrX	154575207	154575475	chrX:154575207_154575475	-11221	CLIC2	Distal Intergenic	0.57307	4.8607	4.96343	0.0258888	0.625287
peak_22609	chr15	19188946	19189440	chr15:19188946_19189440	-1298557	CHEK2P2	Distal Intergenic	0.546382	4.79876	4.96203	0.0259098	0.625287
peak_43453	chr20	27565241	27565512	chr20:27565241_27565512	-1375372	MIR663AHG	Distal Intergenic	-0.593206	3.61048	4.96034	0.0259351	0.625287
peak_44987	chr21	7626127	7626805	chr21:7626127_7626805	-2199027	MIR3648-1	Distal Intergenic	2.28373	2.18571	4.96066	0.0259303	0.625287
peak_54421	chr4	143405366	143405658	chr4:143405366_143405658	361946	INPP4B	Intron	-1.10378	2.8264	4.95937	0.0259496	0.625287
peak_57039	chr5	76868041	76868530	chr5:76868041_76868530	65992	OTP	Distal Intergenic	1.3668	2.10983	4.95855	0.025962	0.625287
peak_25169	chr16	2842255	2843226	chr16:2842255_2843226	-5260	PRSS41	Distal Intergenic	-0.861168	3.23229	4.95053	0.0260827	0.627711
peak_59871	chr6	25017624	25018350	chr6:25017624_25018350	24048	RIPOR2	Intron	1.0842	2.33189	4.94146	0.0262199	0.628292
peak_60543	chr6	41371631	41372880	chr6:41371631_41372880	68103	NCR2	Distal Intergenic	-0.390573	5.72903	4.9383	0.0262679	0.628292
peak_66712	chr7	105910105	105910454	chr7:105910105_105910454	15184	NAMPT	Intron	0.799896	2.55862	4.93994	0.0262429	0.628292
peak_67211	chr7	134855890	134856533	chr7:134855890_134856533	-312	CYREN	Promoter	1.08193	2.11295	4.94597	0.0261515	0.628292
peak_75103	chrX	42942986	42945023	chrX:42942986_42945023	-305500	PPP1R2C	Distal Intergenic	0.799145	2.97714	4.94483	0.0261688	0.628292
peak_10626	chr10	124403266	124404198	chr10:124403266_124404198	55140	C10orf120	Distal Intergenic	2.09409	5.68422	4.937	0.0262877	0.628292
peak_55184	chr5	14174042	14174537	chr5:14174042_14174537	30213	TRIO	Intron	-0.29799	6.16463	4.9374	0.0262815	0.628292
peak_55208	chr5	14720426	14720747	chr5:14720426_14720747	7623	LOC100130744	Intron	1.00783	2.82702	4.94058	0.0262332	0.628292
peak_57506	chr5	109354993	109355258	chr5:109354993_109355258	136110	LINC01848	Distal Intergenic	-1.23078	3.89517	4.94089	0.0262285	0.628292
peak_65129	chr7	38433399	38434376	chr7:38433399_38434376	52221	TRG-AS1	Exon	-0.388802	5.82302	4.93378	0.0263367	0.628953
peak_58598	chr5	157822014	157822272	chr5:157822014_157822272	-535831	CLINT1	Distal Intergenic	0.627918	3.64661	4.93254	0.0263556	0.628953
peak_74469	chrX	231658	232709	chrX:231658_232709	2300679	LINC00102	Distal Intergenic	-0.28372	6.15155	4.9312	0.0263759	0.628959
peak_13537	chr11	108242548	108243022	chr11:108242548_108243022	95236	C11orf65	Intron	-0.757409	2.95131	4.92404	0.0264855	0.630129
peak_47664	chr22	50306831	50307636	chr22:50306831_50307636	4470	ALG12	5' UTR	2.17404	2.53277	4.926	0.0264555	0.630129
peak_48335	chr3	18345954	18346490	chr3:18345954_18346490	133775	SATB1	Distal Intergenic	-0.30323	5.96722	4.92532	0.0264658	0.630129
peak_71002	chr9	15350941	15351464	chr9:15350941_15351464	-43583	TTC39B	Distal Intergenic	-0.910134	3.20259	4.92273	0.0265056	0.630129
peak_50739	chr3	128784347	128784646	chr3:128784347_128784646	4702	GP9	Distal Intergenic	1.50086	2.43792	4.91835	0.0265728	0.631246
peak_16096	chr12	51820244	51822236	chr12:51820244_51822236	-34843	GALNT6	Intron	0.977045	3.1693	4.91549	0.0266169	0.631776
peak_45744	chr21	42200717	42201633	chr21:42200717_42201633	17406	DSCAM	Intron	1.44818	2.29691	4.91428	0.0266355	0.631776
peak_51716	chr3	185354034	185354524	chr3:185354034_185354524	53527	SENP2	Distal Intergenic	1.99249	4.70034	4.90455	0.0267861	0.634384
peak_75221	chrX	48651884	48652500	chrX:48651884_48652500	6902	GATA1	Exon	0.641281	3.51313	4.9046	0.0267853	0.634384
peak_36209	chr19	51016905	51017376	chr19:51016905_51017376	571	ASPDH	5' UTR	0.87044	2.41008	4.89969	0.0268615	0.63552
peak_43426	chr20	27390539	27391006	chr20:27390539_27391006	-1200670	MIR663AHG	Distal Intergenic	1.54669	2.51134	4.89884	0.0268747	0.63552
peak_45685	chr21	38938301	38938730	chr21:38938301_38938730	198442	DYRK1A	Distal Intergenic	-1.95163	2.59408	4.89689	0.0269051	0.635757
peak_34822	chr19	26684653	26684880	chr19:26684653_26684880	1599968	LINC00662	Distal Intergenic	0.907438	2.79871	4.88935	0.0270229	0.636372
peak_41318	chr2	192598720	192599634	chr2:192598720_192599634	55922	NABP1	Distal Intergenic	0.791328	2.29972	4.89253	0.0269731	0.636372
peak_8294	chr10	27225806	27226212	chr10:27225806_27226212	4718	FAM238C	Exon	0.820664	2.51707	4.88871	0.0270329	0.636373
peak_68595	chr8	27315276	27315721	chr8:27315276_27315721	21092	CHRNA2	Intron	0.554261	4.02167	4.88943	0.0270216	0.636373
peak_73372	chr9	124657910	124659711	chr9:124657910_124659711	196174	TTLL11	Intron	-0.342344	5.48737	4.89302	0.0269655	0.636373
peak_62309	chr6	139160818	139162537	chr6:139160818_139162537	43570	ECT2L	Intron	-0.459996	4.90052	4.88399	0.0271069	0.637156
peak_68686	chr8	29328870	29329400	chr8:29328870_29329400	-120603	DUSP4	Distal Intergenic	-0.298157	5.83784	4.88439	0.0271005	0.637156
peak_35473	chr19	40598426	40599011	chr19:40598426_40599011	-1581	ZNF780A	Promoter	0.976069	2.15103	4.87552	0.0272402	0.639807
peak_38175	chr2	60906354	60906663	chr2:60906354_60906663	-76702	PAPOLG	Distal Intergenic	1.72558	5.27492	4.87261	0.0272862	0.640406
peak_16482	chr12	57864755	57865961	chr12:57864755_57865961	10837	GLI1	3' UTR	1.09136	2.4077	4.87067	0.0273169	0.640646
peak_61125	chr6	72669470	72669852	chr6:72669470_72669852	73064	RIMS1	Intron	0.637862	3.75539	4.8661	0.0273893	0.641863
peak_44147	chr20	41479963	41480709	chr20:41479963_41480709	337848	PTPRT	Intron	0.677625	3.38181	4.86368	0.0274277	0.642132
peak_71157	chr9	27528159	27530066	chr9:27528159_27530066	0	MOB3B	Promoter	-0.377924	5.14285	4.86279	0.0274419	0.642132
peak_67803	chr7	157138101	157140563	chr7:157138101_157140563	8391	DNAJB6	Intron	0.837599	2.84428	4.86062	0.0274765	0.642462
peak_75196	chrX	47635015	47635283	chrX:47635015_47635283	-61018	ZNF81	Distal Intergenic	1.66433	2.53694	4.85858	0.0275089	0.642739
peak_20504	chr14	38101611	38101939	chr14:38101611_38101939	-37286	FOXA1	Intron	1.5101	2.29926	4.85645	0.0275429	0.643052
peak_64985	chr7	33040488	33041420	chr7:33040488_33041420	43483	FKBP9	Intron	0.750683	2.25175	4.85457	0.027573	0.643274
peak_40008	chr2	119697484	119698474	chr2:119697484_119698474	-1271	MARCO	Promoter	-0.338912	5.90666	4.85305	0.0275973	0.643361
peak_48921	chr3	44476199	44476796	chr3:44476199_44476796	84430	ZNF445	Distal Intergenic	2.38672	3.06353	4.84892	0.0276634	0.644422
peak_5557	chr1	169371521	169371885	chr1:169371521_169371885	34327	BLZF1	Intron	-0.645503	4.27114	4.84581	0.0277133	0.644925
peak_48889	chr3	43316949	43318057	chr3:43316949_43318057	-9947	SNRK	Distal Intergenic	-0.796939	2.50598	4.84501	0.0277263	0.644925
peak_56274	chr5	49125995	49127156	chr5:49125995_49127156	610078	EMB	Distal Intergenic	0.621009	3.13051	4.83797	0.0278396	0.64708
peak_57813	chr5	131311930	131313287	chr5:131311930_131313287	-30539	MEIKIN	Exon	-0.311119	6.23461	4.83059	0.027959	0.64913
peak_67005	chr7	128425658	128426218	chr7:128425658_128426218	-5246	CCDC136	Distal Intergenic	-0.296441	7.12157	4.82995	0.0279694	0.64913
peak_31781	chr18	23885800	23886205	chr18:23885800_23886205	79391	TAF4B	Intron	1.6682	2.47327	4.82113	0.0281129	0.651122
peak_47531	chr22	45440820	45441563	chr22:45440820_45441563	-35011	PHF21B	Distal Intergenic	0.765851	2.46253	4.82084	0.0281177	0.651122
peak_53109	chr4	50662024	50662504	chr4:50662024_50662504	1673759	CWH43	Distal Intergenic	-0.295009	6.273	4.82214	0.0280964	0.651122
peak_67427	chr7	142620502	142620931	chr7:142620502_142620931	9889	TRPV5	Intron	-0.378984	5.23343	4.81701	0.0281803	0.65187
peak_73366	chr9	124477667	124477890	chr9:124477667_124477890	148268	DAB2IP	Intron	-0.271016	6.63989	4.81631	0.0281917	0.65187
peak_49852	chr3	89107158	89108082	chr3:89107158_89108082	-48592	EPHA3	Distal Intergenic	-0.38209	4.90918	4.81242	0.0282553	0.652859
peak_37148	chr2	10398713	10398919	chr2:10398713_10398919	-44111	HPCAL1	Distal Intergenic	1.39501	3.07029	4.80547	0.0283696	0.654049
peak_41061	chr2	179024456	179025031	chr2:179024456_179025031	-34177	OSBPL6	Distal Intergenic	0.839336	2.6187	4.80749	0.0283363	0.654049
peak_56675	chr5	56883966	56884286	chr5:56883966_56884286	-105330	ACTBL2	Distal Intergenic	1.09447	2.53516	4.80569	0.0283658	0.654049
peak_48172	chr3	13890635	13891177	chr3:13890635_13891177	30441	WNT7A	Intron	1.26486	2.1248	4.80114	0.0284409	0.65521
peak_61180	chr6	79045998	79046325	chr6:79045998_79046325	-530936	IRAK1BP1	Distal Intergenic	0.669325	3.45433	4.79719	0.0285062	0.656231
peak_65004	chr7	35630680	35631334	chr7:35630680_35631334	103438	HERPUD2	Distal Intergenic	0.557904	4.33933	4.79234	0.0285866	0.657597
peak_40752	chr2	169462411	169465206	chr2:169462411_169465206	22958	MIR4774	Intron	1.7578	2.3824	4.78489	0.0287104	0.659318
peak_61127	chr6	72819775	72820022	chr6:72819775_72820022	223369	RIMS1	Intron	0.815486	3.73419	4.78404	0.0287247	0.659318
peak_64313	chr7	2377574	2378200	chr7:2377574_2378200	-16274	EIF3B	Distal Intergenic	0.867865	4.49146	4.78497	0.0287091	0.659318
peak_38049	chr2	54429686	54430249	chr2:54429686_54430249	53160	TSPYL6	Intron	0.567706	3.72341	4.78048	0.0287841	0.660197
peak_45765	chr21	42434820	42435569	chr21:42434820_42435569	84422	LINC00323	Distal Intergenic	0.475334	5.35863	4.77409	0.0288911	0.661679
peak_54959	chr4	190037845	190038433	chr4:190037845_190038433	715955	LINC01060	Distal Intergenic	0.518864	4.85263	4.77474	0.0288803	0.661679
peak_73841	chr9	133658659	133659764	chr9:133658659_133659764	69391	ABL1	Intron	-0.384334	6.08314	4.77205	0.0289254	0.661729
peak_28976	chr17	40306598	40307411	chr17:40306598_40307411	0	RAB5C	Promoter	-0.761674	3.71393	4.77144	0.0289356	0.661729
peak_62129	chr6	134707475	134707726	chr6:134707475_134707726	-51128	LINC01010	Distal Intergenic	-0.910428	2.76219	4.76233	0.0290892	0.663913
peak_75975	chrX	119887646	119888192	chrX:119887646_119888192	121587	CT47B1	Distal Intergenic	-0.334625	5.87197	4.76216	0.029092	0.663913
peak_75988	chrX	120310986	120311524	chrX:120310986_120311524	129524	GLUD2	Distal Intergenic	-0.419725	5.30497	4.762	0.0290948	0.663913
peak_76032	chrX	124014710	124015284	chrX:124014710_124015284	82382	TENM1	Intron	-0.344502	5.42105	4.75486	0.0292157	0.666187
peak_42513	chr2	237700521	237701404	chr2:237700521_237701404	231097	ACKR3	Distal Intergenic	-0.50241	6.01713	4.75333	0.0292417	0.666293
peak_66554	chr7	101299693	101300625	chr7:101299693_101300625	-27117	MYL10	Distal Intergenic	-0.560087	5.23462	4.75052	0.0292895	0.66641
peak_67871	chr7	158723787	158724078	chr7:158723787_158724078	74518	WDR60	Intron	-0.627733	4.4023	4.7515	0.0292727	0.66641
peak_68262	chr8	11801987	11803838	chr8:11801987_11803838	28270	DEFB136	Distal Intergenic	-0.774734	2.90808	4.74655	0.0293571	0.667462
peak_73750	chr9	131738869	131740541	chr9:131738869_131740541	-28857	DOLK	Intron	-0.305258	5.68058	4.7399	0.0294707	0.669092
peak_17523	chr12	110780054	110781140	chr12:110780054_110781140	60395	ANAPC7	Exon	0.894474	3.38976	4.73985	0.0294716	0.669092
peak_62871	chr6	158802961	158803330	chr6:158802961_158803330	69269	TULP4	Intron	-0.649535	5.5704	4.73337	0.0295828	0.669156
peak_70311	chr8	132766878	132767753	chr8:132766878_132767753	-148603	EFR3A	Distal Intergenic	-0.435448	5.1816	4.73524	0.0295508	0.669156
peak_33091	chr19	6299766	6300323	chr19:6299766_6300323	-19807	MLLT1	Distal Intergenic	-0.788267	2.31323	4.73221	0.0296028	0.669156
peak_33554	chr19	13060969	13061978	chr19:13060969_13061978	4341	RAD23A	Intron	0.503063	5.11831	4.73673	0.0295252	0.669156
peak_40664	chr2	165016652	165017213	chr2:165016652_165017213	-424139	FIGN	Distal Intergenic	1.24855	2.12569	4.73287	0.0295914	0.669156
peak_52490	chr4	7780937	7781491	chr4:7780937_7781491	25120	AFAP1-AS1	Intron	0.76887	2.10106	4.73676	0.0295246	0.669156
peak_66633	chr7	103446224	103446618	chr7:103446224_103446618	183345	RELN	Intron	0.946938	2.27285	4.73063	0.02963	0.669287
peak_71668	chr9	43736106	43736487	chr9:43736106_43736487	51221	CNTNAP3B	Intron	2.59042	2.8024	4.72692	0.029694	0.669545
peak_49318	chr3	53197019	53197242	chr3:53197019_53197242	1796	PRKCD	Intron	0.980959	2.29955	4.7268	0.0296961	0.669545
peak_53389	chr4	74671063	74671370	chr4:74671063_74671370	-30903	CXCL6	Distal Intergenic	-0.245986	7.24963	4.72624	0.0297057	0.669545
peak_38959	chr2	92380579	92381034	chr2:92380579_92381034	251420	ACTR3BP2	Distal Intergenic	0.628053	3.09032	4.72299	0.029762	0.669848
peak_39037	chr2	92566518	92567783	chr2:92566518_92567783	437359	ACTR3BP2	Distal Intergenic	0.856789	2.22037	4.7239	0.0297462	0.669848
peak_40021	chr2	120108967	120110152	chr2:120108967_120110152	14252	C2orf76	Intron	0.761665	2.10773	4.71819	0.0298451	0.671237
peak_65715	chr7	59907945	59909230	chr7:59907945_59909230	2398062	ZNF716	Distal Intergenic	-1.05871	2.37443	4.71275	0.0299397	0.672879
peak_45161	chr21	12665367	12665666	chr21:12665367_12665666	-1566430	BAGE3	Distal Intergenic	0.884838	2.98918	4.71002	0.0299873	0.672982
peak_46477	chr22	20474727	20475225	chr22:20474727_20475225	-12941	RIMBP3	Distal Intergenic	0.644937	3.36739	4.71032	0.029982	0.672982
peak_33069	chr19	5977342	5978894	chr19:5977342_5978894	0	RANBP3	Promoter	0.708299	3.60975	4.70864	0.0300113	0.673037
peak_25654	chr16	21517378	21521062	chr16:21517378_21521062	10703	SMG1P3	Intron	0.846264	2.30717	4.70467	0.0300807	0.67411
peak_39613	chr2	104539670	104539899	chr2:104539670_104539899	484891	LOC100287010	Distal Intergenic	-0.752437	2.14732	4.70143	0.0301375	0.674899
peak_49501	chr3	60429977	60430549	chr3:60429977_60430549	806584	FHIT	Intron	-0.587941	3.62475	4.69912	0.0301781	0.675303
peak_56794	chr5	62804390	62804937	chr5:62804390_62804937	453182	HTR1A	Distal Intergenic	0.502344	4.4767	4.69794	0.0301988	0.675303
peak_57429	chr5	99929479	99929881	chr5:99929479_99929881	58355	FAM174A	Distal Intergenic	1.1002	2.49772	4.6966	0.0302223	0.675346
peak_42567	chr2	239047226	239047982	chr2:239047226_239047982	0	KLHL30	Promoter	-0.61477	3.18524	4.6926	0.0302928	0.675956
peak_57333	chr5	95664280	95664742	chr5:95664280_95664742	104243	PCSK1	Distal Intergenic	0.637833	4.20582	4.69269	0.0302911	0.675956
peak_56093	chr5	48629529	48629949	chr5:48629529_48629949	1107285	EMB	Distal Intergenic	-0.703253	2.45445	4.69085	0.0303237	0.676163
peak_35541	chr19	41530643	41532156	chr19:41530643_41532156	2012	CYP2A7	Exon	0.755244	2.38794	4.68675	0.0303961	0.677293
peak_61385	chr6	90413494	90414568	chr6:90413494_90414568	-65020	LYRM2	Intron	0.665835	2.99268	4.68234	0.0304742	0.678551
peak_52370	chr4	3037285	3038604	chr4:3037285_3038604	37637	HTT-AS	Intron	-1.30542	2.50459	4.67775	0.0305557	0.679827
peak_54810	chr4	177339657	177340397	chr4:177339657_177340397	98567	SPCS3	Distal Intergenic	0.837819	2.6154	4.67667	0.030575	0.679827
peak_64893	chr7	28174409	28174726	chr7:28174409_28174726	-45350	JAZF1-AS1	Intron	0.738505	2.42334	4.67527	0.0305998	0.679895
peak_60568	chr6	41938132	41939048	chr6:41938132_41939048	49167	BYSL	Intron	0.571403	4.19175	4.66902	0.0307114	0.680439
peak_74963	chrX	38803841	38806170	chrX:38803841_38806170	143156	MID1IP1	Distal Intergenic	-0.343687	6.32629	4.67232	0.0306525	0.680439
peak_3936	chr1	123422462	123423380	chr1:123422462_123423380	2161552	EMBP1	Distal Intergenic	0.89633	2.26929	4.66999	0.0306941	0.680439
peak_54387	chr4	142294556	142294791	chr4:142294556_142294791	152507	ZNF330	Distal Intergenic	-0.66052	8.16944	4.66932	0.030706	0.680439
peak_74993	chrX	39730820	39731365	chrX:39730820_39731365	305217	BCOR	Distal Intergenic	1.01323	2.36192	4.6653	0.0307781	0.681433
peak_61503	chr6	106164408	106164682	chr6:106164408_106164682	-313409	PREP	Distal Intergenic	-0.487452	4.82829	4.65925	0.0308866	0.683353
peak_72800	chr9	94250376	94251052	chr9:94250376_94251052	-64232	NFIL3	Distal Intergenic	-0.281174	6.0709	4.65695	0.0309281	0.683786
peak_51858	chr3	189184907	189185205	chr3:189184907_189185205	-164011	TP63	Distal Intergenic	0.856579	2.2654	4.65458	0.0309708	0.684246
peak_38375	chr2	68762560	68763334	chr2:68762560_68763334	-50570	PROKR1	Intron	0.670702	3.19713	4.65143	0.0310276	0.684668
peak_40256	chr2	136115019	136119730	chr2:136115019_136119730	169076	ZRANB3	Intron	0.815612	2.19305	4.6511	0.0310337	0.684668
peak_51892	chr3	191973017	191973307	chr3:191973017_191973307	472081	FGF12	Intron	-0.39658	5.15934	4.6464	0.0311187	0.68606
peak_44376	chr20	49045677	49047370	chr20:49045677_49047370	-79521	PTPN1	Distal Intergenic	-0.312081	7.27116	4.64407	0.031161	0.686253
peak_72017	chr9	44795016	44795383	chr9:44795016_44795383	-194853	FAM27C	Distal Intergenic	0.6843	3.01862	4.6435	0.0311714	0.686253
peak_49699	chr3	71497130	71497720	chr3:71497130_71497720	93520	MIR1284	Intron	1.273	2.66721	4.63873	0.0312582	0.68768
peak_21473	chr14	80930686	80931666	chr14:80930686_80931666	-233289	DIO2	Distal Intergenic	0.772773	2.98046	4.62422	0.0315235	0.688537
peak_28898	chr17	39231721	39232410	chr17:39231721_39232410	-8049	KRTAP4-7	Distal Intergenic	0.815597	3.12442	4.62334	0.0315397	0.688537
peak_33618	chr19	14021573	14021961	chr19:14021573_14021961	4617	CC2D1A	Intron	0.984359	2.88868	4.6247	0.0315148	0.688537
peak_47562	chr22	46370921	46371190	chr22:46370921_46371190	1818	WNT7B	Intron	0.9189	2.45132	4.62216	0.0315614	0.688537
peak_48124	chr3	12840551	12842231	chr3:12840551_12842231	2380	CAND2	Intron	0.563308	4.02962	4.62925	0.0314312	0.688537
peak_48916	chr3	44207890	44208814	chr3:44207890_44208814	52186	MIR138-1	Distal Intergenic	0.670041	2.84755	4.62587	0.0314932	0.688537
peak_56176	chr5	48861645	48862427	chr5:48861645_48862427	874807	EMB	Distal Intergenic	0.66019	3.02859	4.63129	0.031394	0.688537
peak_58358	chr5	148458424	148458782	chr5:148458424_148458782	-15687	SH3TC2	Distal Intergenic	0.865491	2.18627	4.63286	0.0313652	0.688537
peak_9282	chr10	63084011	63084341	chr10:63084011_63084341	128867	TMEM26	Distal Intergenic	0.727489	2.53767	4.62757	0.031462	0.688537
peak_67759	chr7	155366802	155367470	chr7:155366802_155367470	-40263	CNPY1	Distal Intergenic	0.825218	3.41417	4.63533	0.0313202	0.688537
peak_75215	chrX	48538995	48540755	chrX:48538995_48540755	-1431	WAS	Promoter	-0.548686	4.52619	4.62951	0.0314265	0.688537
peak_75957	chrX	119688661	119689568	chrX:119688661_119689568	20116	CUL4B	Intron	-0.3143	5.42332	4.62298	0.0315463	0.688537
peak_45875	chr21	44159054	44160132	chr21:44159054_44160132	85192	PDE9A	Intron	-0.336798	6.61868	4.61822	0.0316341	0.68916
peak_50262	chr3	107524833	107525926	chr3:107524833_107525926	70989	LINC00635	3' UTR	0.769981	2.39681	4.61928	0.0316146	0.68916
peak_65347	chr7	50317091	50318585	chr7:50317091_50318585	-25793	IKZF1	Distal Intergenic	-0.610272	2.8941	4.61626	0.0316702	0.689466
peak_58231	chr5	141650861	141652029	chr5:141650861_141652029	52591	SPRY4	Distal Intergenic	1.0382	2.68499	4.61306	0.0317293	0.690273
peak_30354	chr17	75587736	75590142	chr17:75587736_75590142	44713	LOC100507351	Distal Intergenic	0.75652	2.16397	4.60674	0.0318466	0.692067
peak_33966	chr19	18557149	18558957	chr19:18557149_18558957	-8038	ISYNA1	Exon	0.800166	2.37856	4.60623	0.031856	0.692067
peak_51632	chr3	183184703	183185006	chr3:183184703_183185006	19307	LINC00888	Distal Intergenic	0.674279	3.46711	4.60172	0.0319398	0.693404
peak_51600	chr3	179322125	179324721	chr3:179322125_179324721	0	MRPL47	Promoter	0.776179	2.69061	4.59788	0.0320115	0.694478
peak_25733	chr16	23556856	23558349	chr16:23556856_23558349	10347	EARS2	Intron	0.771063	2.16831	4.59626	0.0320417	0.694652
peak_47595	chr22	48098119	48098942	chr22:48098119_48098942	-70801	LINC00898	Intron	0.78249	4.13499	4.59432	0.0320781	0.694882
peak_65183	chr7	43599945	43600325	chr7:43599945_43600325	-22367	STK17A	Intron	-0.28278	6.01806	4.59332	0.0320968	0.694882
peak_65030	chr7	36273916	36274270	chr7:36273916_36274270	81080	EEPD1	Intron	0.687862	3.70853	4.59191	0.0321233	0.694974
peak_35682	chr19	44356541	44356778	chr19:44356541_44356778	25068	ZNF283	Distal Intergenic	0.709533	3.1654	4.58924	0.0321733	0.695575
peak_45745	chr21	42218546	42220869	chr21:42218546_42220869	0	DSCAM	Promoter	0.541432	4.55562	4.58704	0.0322146	0.695987
peak_59730	chr6	17987085	17988637	chr6:17987085_17988637	0	KIF13A	Promoter	-0.749734	5.61926	4.58411	0.0322698	0.696697
peak_51805	chr3	187799932	187800433	chr3:187799932_187800433	-71230	LPP	Distal Intergenic	0.86408	2.611	4.58255	0.032299	0.696848
peak_30864	chr17	82236067	82236805	chr17:82236067_82236805	1061401	RPL23AP87	Distal Intergenic	0.863835	2.23721	4.57662	0.032411	0.697819
peak_49356	chr3	56735326	56735831	chr3:56735326_56735831	-18191	TASOR	Distal Intergenic	1.53617	2.3752	4.57728	0.0323987	0.697819
peak_73849	chr9	133742934	133743249	chr9:133742934_133743249	25976	QRFP	Intron	-0.843683	2.90386	4.57765	0.0323916	0.697819
peak_64243	chr7	1458747	1460598	chr7:1458747_1460598	38511	MICALL2	Distal Intergenic	0.853614	2.29652	4.57434	0.0324542	0.698268
peak_59375	chr6	5712551	5712972	chr6:5712551_5712972	294661	NRN1	Intron	0.906757	2.11548	4.57094	0.0325187	0.698694
peak_74691	chrX	12979753	12980429	chrX:12979753_12980429	-12797	TMSB4X	Distal Intergenic	-0.376191	5.3861	4.57182	0.032502	0.698694
peak_46811	chr22	29625589	29626025	chr22:29625589_29626025	23688	EMID1	Intron	0.753843	2.28857	4.56823	0.0325702	0.69932
peak_7189	chr1	234114750	234115002	chr1:234114750_234115002	74071	SLC35F3	Intron	0.742529	2.14982	4.56599	0.0326128	0.699755
peak_66355	chr7	95772372	95773241	chr7:95772372_95773241	75827	MIR591	Intron	-0.444173	4.45078	4.56377	0.032655	0.700179
peak_64279	chr7	1943257	1943775	chr7:1943257_1943775	-59368	MIR4655	Intron	1.0477	2.41959	4.56173	0.032694	0.700535
peak_21597	chr14	90827838	90829118	chr14:90827838_90829118	-29357	NRDE2	Distal Intergenic	0.955297	2.20305	4.55988	0.0327293	0.700811
peak_72775	chr9	93500720	93501901	chr9:93500720_93501901	-62111	SYK	Distal Intergenic	0.78959	3.66409	4.55687	0.032787	0.701085
peak_53702	chr4	88488942	88489743	chr4:88488942_88489743	-38287	SPARCL1	Distal Intergenic	0.905328	2.73569	4.55763	0.0327723	0.701085
peak_50943	chr3	138937429	138938775	chr3:138937429_138938775	13589	PISRT1	Distal Intergenic	1.08166	2.49912	4.55419	0.0328384	0.701704
peak_59670	chr6	15491276	15492049	chr6:15491276_15492049	171240	DTNBP1	Intron	-0.872392	3.58296	4.54986	0.0329214	0.702998
peak_5021	chr1	154954797	154956481	chr1:154954797_154956481	0	FLAD1	Promoter	0.722721	3.25443	4.54864	0.032945	0.703021
peak_52015	chr3	195953829	195955421	chr3:195953829_195955421	10446	SLC51A	5' UTR	0.710184	2.44115	4.54392	0.0330358	0.703119
peak_62829	chr6	158008688	158009900	chr6:158008688_158009900	58524	MIR3692	Intron	-0.294317	5.82365	4.54424	0.0330296	0.703119
peak_70441	chr8	141278287	141279037	chr8:141278287_141279037	189641	TRAPPC9	Intron	0.774799	2.91207	4.54373	0.0330396	0.703119
peak_76498	chrX	154885941	154887557	chrX:154885941_154887557	-43319	TMLHE	Distal Intergenic	-0.729742	2.39609	4.54546	0.0330062	0.703119
peak_33893	chr19	17865306	17865931	chr19:17865306_17865931	6779	FCHO1	5' UTR	1.06495	3.42388	4.52001	0.0335006	0.708944
peak_45775	chr21	42537381	42537638	chr21:42537381_42537638	-1846	MIR3197	Promoter	-2.60497	3.78408	4.51888	0.0335227	0.708944
peak_48701	chr3	36900886	36901246	chr3:36900886_36901246	85302	TRANK1	Intron	0.743508	2.64565	4.52213	0.0334592	0.708944
peak_51308	chr3	158094377	158094938	chr3:158094377_158094938	-194015	MLF1	Intron	-0.266357	7.61616	4.52145	0.0334724	0.708944
peak_51957	chr3	195250629	195250875	chr3:195250629_195250875	19349	PPP1R2	Intron	0.350907	5.67715	4.52518	0.0333996	0.708944
peak_52886	chr4	38957391	38958073	chr4:38957391_38958073	75968	TMEM156	Distal Intergenic	-0.589361	4.10597	4.52449	0.0334131	0.708944
peak_53628	chr4	83266591	83266851	chr4:83266591_83266851	28298	HNRNPD	Distal Intergenic	0.636392	3.48681	4.52497	0.0334037	0.708944
peak_55135	chr5	6734581	6735011	chr5:6734581_6735011	19863	TENT4A	Intron	-0.258921	7.19808	4.51721	0.0335556	0.708944
peak_58859	chr5	176305241	176305749	chr5:176305241_176305749	20584	HK3	Exon	0.664261	2.56784	4.52425	0.0334177	0.708944
peak_6305	chr1	203342456	203342812	chr1:203342456_203342812	-22167	FMOD	Distal Intergenic	0.806761	2.60883	4.51684	0.0335627	0.708944
peak_65065	chr7	37115805	37116939	chr7:37115805_37116939	-156768	MIR1200	Intron	-0.270294	6.07792	4.52328	0.0334367	0.708944
peak_19006	chr13	46586131	46586386	chr13:46586131_46586386	40508	ZC3H13	Intron	2.05449	3.07247	4.51403	0.0336179	0.709614
peak_34738	chr19	26488676	26488926	chr19:26488676_26488926	1795922	LINC00662	Distal Intergenic	0.705613	2.57911	4.51292	0.0336398	0.709614
peak_66459	chr7	100148091	100149828	chr7:100148091_100149828	11257	AGFG2	Exon	-0.578257	3.29691	4.5099	0.0336992	0.710387
peak_72154	chr9	60568342	60568985	chr9:60568342_60568985	4925401	FAM74A4	Distal Intergenic	-0.680181	3.2295	4.50501	0.0337957	0.711518
peak_46499	chr22	20804084	20804285	chr22:20804084_20804285	-11938	SCARF2	Intron	1.29844	3.31196	4.50487	0.0337984	0.711518
peak_29800	chr17	59825608	59826152	chr17:59825608_59826152	114768	BRIP1	Intron	1.7584	2.53062	4.4968	0.0339584	0.712011
peak_54701	chr4	165541898	165542455	chr4:165541898_165542455	-132828	SMIM31	Distal Intergenic	1.36971	2.71397	4.49738	0.0339469	0.712011
peak_58186	chr5	140547007	140548747	chr5:140547007_140548747	-3496	PCDHB7	Distal Intergenic	0.970054	3.05262	4.49898	0.033915	0.712011
peak_8413	chr10	31133407	31134663	chr10:31133407_31134663	186203	ZNF438	3' UTR	-0.571817	4.23857	4.49948	0.0339052	0.712011
peak_67302	chr7	139482955	139484032	chr7:139482955_139484032	4908	TBXAS1	Intron	-0.758551	3.33392	4.49715	0.0339515	0.712011
peak_76165	chrX	132480198	132481545	chrX:132480198_132481545	67660	GPC4	Intron	-0.709341	4.58364	4.49935	0.0339078	0.712011
peak_28141	chr17	17812001	17813194	chr17:17812001_17813194	62590	TOM1L2	Intron	0.855814	2.72691	4.48799	0.0341338	0.712758
peak_28968	chr17	40176990	40178595	chr17:40176990_40178595	-7275	DNAJC7	3' UTR	-0.789377	2.40213	4.48384	0.0342168	0.712758
peak_31216	chr18	681800	682538	chr18:681800_682538	-23460	TYMSOS	Intron	0.769545	2.64373	4.47908	0.0343122	0.712758
peak_44816	chr20	63486857	63487090	chr20:63486857_63487090	565119	LINC00266-1	Distal Intergenic	-0.579757	5.38975	4.47644	0.0343652	0.712758
peak_45016	chr21	8242583	8242792	chr21:8242583_8242792	-1583040	MIR3648-1	Distal Intergenic	0.669508	4.13103	4.49064	0.034081	0.712758
peak_49967	chr3	91168303	91169044	chr3:91168303_91169044	2011629	EPHA3	Distal Intergenic	0.748753	2.87243	4.47457	0.034403	0.712758
peak_53908	chr4	104106828	104107041	chr4:104106828_104107041	12525	CENPE	Exon	0.69516	2.22927	4.47223	0.0344501	0.712758
peak_55160	chr5	10441164	10442490	chr5:10441164_10442490	0	ROPN1L-AS1	Promoter	-0.316869	5.77192	4.48217	0.0342502	0.712758
peak_56069	chr5	48564679	48565573	chr5:48564679_48565573	1171661	EMB	Distal Intergenic	-0.824694	2.71935	4.47515	0.0343912	0.712758
peak_59072	chr5	181169524	181169998	chr5:181169524_181169998	375236	OR4F16	Distal Intergenic	0.782127	2.54336	4.49273	0.0340392	0.712758
peak_59456	chr6	8017311	8017977	chr6:8017311_8017977	30976	PIP5K1P1	Intron	-0.509591	5.40574	4.48119	0.0342698	0.712758
peak_60285	chr6	34609455	34610048	chr6:34609455_34610048	54577	ILRUN	Intron	0.952885	2.19642	4.48911	0.0341114	0.712758
peak_61439	chr6	99424666	99426349	chr6:99424666_99426349	-28817	FBXL4	Distal Intergenic	-0.795378	2.71002	4.48694	0.0341548	0.712758
peak_62271	chr6	138005896	138006322	chr6:138005896_138006322	-182003	TNFAIP3	Distal Intergenic	-0.246795	7.33922	4.47319	0.0344307	0.712758
peak_65894	chr7	65722310	65722711	chr7:65722310_65722711	52051	TPST1	Intron	0.732791	2.85403	4.4838	0.0342175	0.712758
peak_69170	chr8	60828029	60829279	chr8:60828029_60829279	364675	CA8	Distal Intergenic	-0.665567	2.70548	4.47754	0.0343431	0.712758
peak_72052	chr9	44959779	44961378	chr9:44959779_44961378	-28858	FAM27C	Distal Intergenic	-0.388826	4.87625	4.48348	0.034224	0.712758
peak_73456	chr9	127203872	127204295	chr9:127203872_127204295	-9128	ADGRD2	Distal Intergenic	-0.262155	6.7912	4.48818	0.03413	0.712758
peak_73713	chr9	131349844	131350806	chr9:131349844_131350806	35007	SPTAN1	Exon	-0.288034	5.84593	4.47348	0.0344248	0.712758
peak_75874	chrX	110238148	110238942	chrX:110238148_110238942	50635	PAK3	Intron	-0.474136	5.0053	4.47424	0.0344095	0.712758
peak_68821	chr8	38357371	38357941	chr8:38357371_38357941	28239	C8orf86	Distal Intergenic	0.685594	2.63832	4.46832	0.0345289	0.713916
peak_51149	chr3	151225453	151225842	chr3:151225453_151225842	-48956	IGSF10	Distal Intergenic	0.932232	5.04022	4.4657	0.0345818	0.71423
peak_72992	chr9	101495876	101496230	chr9:101495876_101496230	-24397	GABBR2	3' UTR	-1.86432	2.84043	4.46531	0.0345897	0.71423
peak_71092	chr9	20996843	20997872	chr9:20996843_20997872	33763	HACD4	Distal Intergenic	0.798441	2.79358	4.46177	0.0346615	0.715072
peak_74685	chrX	12967169	12968401	chrX:12967169_12968401	-5750	TLR8-AS1	Distal Intergenic	-0.262632	6.57364	4.46105	0.0346763	0.715072
peak_66764	chr7	107560877	107561294	chr7:107560877_107561294	29291	DLD	3' UTR	1.5587	3.33276	4.45841	0.0347299	0.715705
peak_69679	chr8	96163805	96164039	chr8:96163805_96164039	17856	PLEKHF2	Intron	-0.430773	5.29581	4.45314	0.0348371	0.717443
peak_75093	chrX	41908928	41909505	chrX:41908928_41909505	-126641	CASK	Distal Intergenic	-0.252448	6.87702	4.45098	0.0348811	0.717876
peak_68391	chr8	19517660	19517924	chr8:19517660_19517924	97458	CSGALNACT1	Intron	-0.691781	3.07581	4.44828	0.0349364	0.717962
peak_73919	chr9	136351883	136352143	chr9:136351883_136352143	-7607	SLC2A6	Distal Intergenic	-0.559375	3.7307	4.44887	0.0349243	0.717962
peak_37973	chr2	46940307	46942780	chr2:46940307_46942780	14208	SOCS5	Intron	-0.517762	3.79002	4.44741	0.0349542	0.717962
peak_22691	chr15	21692267	21693215	chr15:21692267_21693215	247524	LOC646214	Distal Intergenic	0.609446	3.66697	4.44042	0.0350977	0.718078
peak_45866	chr21	44106715	44108092	chr21:44106715_44108092	32853	PDE9A	5' UTR	0.826604	3.13462	4.44265	0.0350517	0.718078
peak_56082	chr5	48603117	48605494	chr5:48603117_48605494	1131740	EMB	Distal Intergenic	-0.95236	3.74777	4.44447	0.0350144	0.718078
peak_67537	chr7	149087469	149087720	chr7:149087469_149087720	70333	ZNF777	Distal Intergenic	0.648339	2.89189	4.4405	0.035096	0.718078
peak_68970	chr8	44746110	44746789	chr8:44746110_44746789	1598525	POTEA	Distal Intergenic	-0.279043	6.10368	4.44236	0.0350578	0.718078
peak_69216	chr8	65744921	65745371	chr8:65744921_65745371	-33573	CYP7B1	Distal Intergenic	-0.248767	6.76354	4.44182	0.0350688	0.718078
peak_62428	chr6	143553205	143553674	chr6:143553205_143553674	172705	AIG1	Intron	-0.276558	7.32806	4.43759	0.0351557	0.718152
peak_62572	chr6	149925487	149926671	chr6:149925487_149926671	10735	RPS18P9	Exon	0.713499	2.67899	4.43447	0.0352201	0.718152
peak_64874	chr7	27210261	27210936	chr7:27210261_27210936	-1079	MIR196B	Promoter	0.695854	2.9606	4.43657	0.0351769	0.718152
peak_64882	chr7	27784409	27784905	chr7:27784409_27784905	5417	TAX1BP1	Intron	-0.529673	4.79745	4.43519	0.0352054	0.718152
peak_44819	chr20	63519669	63521590	chr20:63519669_63521590	597931	LINC00266-1	Distal Intergenic	0.728181	3.27531	4.43355	0.0352391	0.718152
peak_46791	chr22	29167333	29167746	chr22:29167333_29167746	-916	CCDC117	Promoter	0.78265	2.34542	4.43631	0.0351821	0.718152
peak_53944	chr4	108049186	108050989	chr4:108049186_108050989	153857	DKK2	Intron	0.58583	3.55289	4.42929	0.0353272	0.718838
peak_67780	chr7	155804845	155806046	chr7:155804845_155806046	-199878	SHH	Distal Intergenic	-0.319463	5.46338	4.42917	0.0353297	0.718838
peak_75074	chrX	41339393	41341299	chrX:41339393_41341299	32680	NYX	Distal Intergenic	-0.329219	5.63278	4.42859	0.0353418	0.718838
peak_49700	chr3	71503510	71503750	chr3:71503510_71503750	87490	MIR1284	Intron	0.684332	2.14637	4.4261	0.0353933	0.719419
peak_22716	chr15	22223049	22223951	chr15:22223049_22223951	-54081	LINC02203	Intron	-0.239091	8.56109	4.41881	0.0355449	0.721562
peak_76203	chrX	135112234	135112890	chrX:135112234_135112890	44651	SLC9A6	Exon	-0.416951	4.99492	4.4199	0.0355222	0.721562
peak_16724	chr12	68745493	68747188	chr12:68745493_68747188	-19332	MDM1	Distal Intergenic	0.710355	3.40701	4.41684	0.0355859	0.721925
peak_57918	chr5	132883273	132883490	chr5:132883273_132883490	64733	FSTL4	Intron	1.00598	2.86195	4.41525	0.035619	0.722128
peak_52387	chr4	3372506	3373214	chr4:3372506_3373214	-70512	HGFAC	Intron	0.653658	2.77908	4.41117	0.0357044	0.72339
peak_32908	chr19	3366650	3367427	chr19:3366650_3367427	7089	NFIC	Exon	-0.26663	7.72573	4.40636	0.0358051	0.72388
peak_38183	chr2	61144584	61145505	chr2:61144584_61145505	35832	REL	Exon	1.51204	6.85911	4.40678	0.0357963	0.72388
peak_51609	chr3	180601487	180602846	chr3:180601487_180602846	-27388	FXR1	Distal Intergenic	0.785282	2.18058	4.40548	0.0358236	0.72388
peak_53447	chr4	77067219	77067702	chr4:77067219_77067702	1953	NUP54	Intron	-0.582855	4.75641	4.40339	0.0358675	0.72388
peak_64394	chr7	4641159	4642853	chr7:4641159_4642853	-40535	FOXK1	Distal Intergenic	1.35436	2.64248	4.40425	0.0358496	0.72388
peak_72832	chr9	95462151	95463460	chr9:95462151_95463460	-29604	IPPK	Distal Intergenic	-0.284106	6.07647	4.40348	0.0358658	0.72388
peak_69019	chr8	48949250	48950141	chr8:48949250_48950141	28255	UBE2V2	Intron	1.20538	3.10849	4.39822	0.0359764	0.724208
peak_34950	chr19	26995914	26997537	chr19:26995914_26997537	1287311	LINC00662	Distal Intergenic	1.32427	3.06098	4.3997	0.0359453	0.724208
peak_40572	chr2	160331401	160331657	chr2:160331401_160331657	-188165	WDSUB1	Intron	1.46453	2.10801	4.3987	0.0359663	0.724208
peak_58971	chr5	178239202	178240287	chr5:178239202_178240287	5149	AACSP1	Intron	-0.323226	5.7538	4.40013	0.0359361	0.724208
peak_76500	chrX	154980577	154981486	chrX:154980577_154981486	-137955	TMLHE	Distal Intergenic	-0.762123	3.13143	4.39602	0.036023	0.724678
peak_33880	chr19	17778839	17779177	chr19:17778839_17779177	19873	UNC13A	Exon	0.574416	4.28504	4.3916	0.0361163	0.725622
peak_49708	chr3	71702062	71703262	chr3:71702062_71703262	-68922	FOXP1	Distal Intergenic	-0.614104	4.25179	4.39232	0.0361011	0.725622
peak_59464	chr6	8827748	8828016	chr6:8827748_8828016	175306	HULC	Distal Intergenic	0.34021	5.39675	4.38866	0.0361788	0.726059
peak_32231	chr18	59899234	59901240	chr18:59899234_59901240	44710	RELCH	Exon	-0.866099	3.31247	4.38839	0.0361845	0.726059
peak_56782	chr5	62326719	62327004	chr5:62326719_62327004	452157	IPO11-LRRC70	Distal Intergenic	0.821061	2.82023	4.38185	0.0363237	0.728384
peak_37501	chr2	27429968	27430786	chr2:27429968_27430786	-4113	ATRAID	5' UTR	0.653585	2.59799	4.37986	0.0363659	0.728763
peak_42565	chr2	238970564	238970880	chr2:238970564_238970880	999	SCLY	Intron	0.684849	2.57127	4.37298	0.0365131	0.729192
peak_51330	chr3	159839845	159840185	chr3:159839845_159840185	-103238	C3orf80	Intron	-0.313298	6.69737	4.37232	0.0365273	0.729192
peak_64210	chr7	1012321	1012557	chr7:1012321_1012557	2678	ADAP1	Intron	-0.24636	7.23886	4.37591	0.0364503	0.729192
peak_66392	chr7	98213715	98214631	chr7:98213715_98214631	-31966	NPTX2	Distal Intergenic	0.734856	3.2663	4.37364	0.0364991	0.729192
peak_72158	chr9	60581276	60582023	chr9:60581276_60582023	4912363	FAM74A4	Distal Intergenic	2.43111	2.79921	4.37486	0.0364729	0.729192
peak_72671	chr9	90221797	90222903	chr9:90221797_90222903	109139	DAPK1	Intron	-0.556086	7.23743	4.37641	0.0364397	0.729192
peak_73961	chr9	136843348	136844462	chr9:136843348_136844462	12984	VAV2	Intron	-0.318864	5.35182	4.37055	0.0365652	0.729483
peak_54569	chr4	153429115	153429922	chr4:153429115_153429922	-18547	MIR3140	Intron	0.702404	2.49784	4.36847	0.0366098	0.729908
peak_62161	chr6	135497130	135498843	chr6:135497130_135498843	-3610	MYB	Distal Intergenic	0.47752	3.987	4.36265	0.0367351	0.730058
peak_69348	chr8	73757257	73757500	chr8:73757257_73757500	-163597	TERF1	Intron	-0.503375	4.92953	4.36178	0.0367539	0.730058
peak_32855	chr19	2773158	2773439	chr19:2773158_2773439	9915	SGTA	Intron	-0.408628	7.08678	4.36162	0.0367574	0.730058
peak_47581	chr22	46737216	46739645	chr22:46737216_46739645	5918	TRMU	Exon	0.704723	2.59679	4.362	0.0367492	0.730058
peak_50835	chr3	132376699	132377237	chr3:132376699_132377237	1738	ACAD11	Intron	0.863609	2.60696	4.36176	0.0367543	0.730058
peak_56860	chr5	67537497	67538211	chr5:67537497_67538211	25913	PIK3R1	Intron	0.880116	2.95973	4.36195	0.0367503	0.730058
peak_72096	chr9	45141345	45142086	chr9:45141345_45142086	151109	FAM27C	Distal Intergenic	1.22104	4.05563	4.35922	0.0368091	0.730621
peak_42233	chr2	230318288	230320006	chr2:230318288_230320006	-182231	PID1	Intron	1.63458	2.24009	4.35187	0.0369684	0.731129
peak_48202	chr3	15051452	15052140	chr3:15051452_15052140	54676	MRPS25	Intron	-0.287557	6.49619	4.35289	0.0369461	0.731129
peak_52563	chr4	9758858	9759715	chr4:9758858_9759715	-23543	DRD5	Distal Intergenic	0.71229	2.50346	4.35282	0.0369478	0.731129
peak_65053	chr7	36776765	36778190	chr7:36776765_36778190	-12611	AOAH	Distal Intergenic	-0.237998	6.56955	4.35337	0.0369359	0.731129
peak_70417	chr8	140668379	140668638	chr8:140668379_140668638	46661	KCNK9	Intron	-0.921722	3.76572	4.35194	0.0369667	0.731129
peak_75124	chrX	44923035	44923752	chrX:44923035_44923752	136394	DIPK2B	Exon	0.73463	3.07847	4.35156	0.0369751	0.731129
peak_45826	chr21	43420009	43421077	chr21:43420009_43421077	9419	ZBTB21	Intron	0.397712	6.3665	4.34892	0.0370325	0.731142
peak_56303	chr5	49206423	49206648	chr5:49206423_49206648	530586	EMB	Distal Intergenic	0.908485	2.13799	4.34963	0.037017	0.731142
peak_67150	chr7	131423999	131424794	chr7:131423999_131424794	-182623	PODXL	Distal Intergenic	-0.304233	6.68769	4.3483	0.0370459	0.731142
peak_75644	chrX	78103462	78105362	chrX:78103462_78105362	51384	MIR4328	Distal Intergenic	-0.258303	6.39758	4.34604	0.0370951	0.731651
peak_60093	chr6	30450718	30451266	chr6:30450718_30451266	-1967148	GPX6	Distal Intergenic	0.778363	2.37868	4.33139	0.0374157	0.734622
peak_60264	chr6	34055103	34055740	chr6:34055103_34055740	67659	GRM4	Intron	0.835865	2.17502	4.33568	0.0373215	0.734622
peak_65968	chr7	70693413	70695955	chr7:70693413_70695955	-76705	MIR3914-2	Intron	-1.01337	3.2838	4.33097	0.0374249	0.734622
peak_24082	chr15	76059002	76060794	chr15:76059002_76060794	-4346	MIR4313	Distal Intergenic	-0.682938	2.48822	4.33274	0.0373859	0.734622
peak_34796	chr19	26621266	26622016	chr19:26621266_26622016	1662832	LINC00662	Distal Intergenic	0.855579	2.1502	4.33057	0.0374337	0.734622
peak_37131	chr2	10072502	10073020	chr2:10072502_10073020	-18772	GRHL1	Intron	1.63276	2.923	4.33666	0.0373001	0.734622
peak_54714	chr4	168153743	168154332	chr4:168153743_168154332	1409	SPOCK3	Intron	0.73239	3.58244	4.33268	0.0373873	0.734622
peak_55232	chr5	16552617	16553141	chr5:16552617_16553141	64026	RETREG1	Intron	-0.306361	5.77972	4.33133	0.0374171	0.734622
peak_53487	chr4	77877244	77877487	chr4:77877244_77877487	6349	SEPTIN11	Intron	0.874516	2.19827	4.32452	0.037567	0.73493
peak_57782	chr5	129125913	129126946	chr5:129125913_129126946	42029	MINAR2	Distal Intergenic	0.641135	3.936	4.32736	0.0375043	0.73493
peak_65512	chr7	58606423	58606717	chr7:58606423_58606717	1096540	ZNF716	Distal Intergenic	0.471951	4.59417	4.32824	0.037485	0.73493
peak_66632	chr7	103406842	103407171	chr7:103406842_103407171	222792	RELN	Intron	-0.543833	4.50395	4.3246	0.0375653	0.73493
peak_75484	chrX	66035113	66036493	chrX:66035113_66036493	-175973	EDA2R	Distal Intergenic	-0.544309	3.9811	4.32465	0.0375642	0.73493
peak_16773	chr12	71684047	71684527	chr12:71684047_71684527	-149023	LGR5	Intron	0.782966	2.3502	4.32155	0.0376325	0.735293
peak_42169	chr2	225229215	225229839	chr2:225229215_225229839	36872	FAM124B	Distal Intergenic	-0.433801	6.68127	4.32215	0.0376193	0.735293
peak_40281	chr2	137639244	137639497	chr2:137639244_137639497	116129	THSD7B	Intron	0.400097	5.06126	4.31905	0.0376879	0.735915
peak_45380	chr21	31166534	31167043	chr21:31166534_31167043	46040	GRIK1-AS1	Intron	0.280198	6.16939	4.31577	0.0377607	0.736416
peak_57021	chr5	76473473	76474291	chr5:76473473_76474291	-32415	PDE8B	Distal Intergenic	0.581505	3.70007	4.31654	0.0377435	0.736416
peak_49258	chr3	52054747	52057984	chr3:52054747_52057984	-24789	RPL29	Distal Intergenic	-0.302046	7.65955	4.31413	0.037797	0.736664
peak_72518	chr9	81002150	81002713	chr9:81002150_81002713	90091	PSAT1	Distal Intergenic	-0.307521	5.6305	4.31072	0.0378728	0.737683
peak_30688	chr17	79844555	79845295	chr17:79844555_79845295	4167	ALYREF	Downstream	1.25194	4.17054	4.30673	0.037962	0.738499
peak_75966	chrX	119779638	119780305	chrX:119779638_119780305	-15633	C1GALT1C1	Distal Intergenic	1.41238	3.54932	4.30676	0.0379613	0.738499
peak_29125	chr17	42527184	42527624	chr17:42527184_42527624	53333	GPATCH8	Intron	0.424721	4.91998	4.30295	0.0380464	0.73968
peak_21766	chr14	95196207	95196674	chr14:95196207_95196674	39825	GSC	Distal Intergenic	1.26097	4.15456	4.29454	0.0382349	0.742422
peak_53314	chr4	70703881	70706292	chr4:70703881_70706292	19578	SULT1E1	Downstream	-0.739108	2.64864	4.29486	0.0382277	0.742422
peak_14960	chr12	14884330	14885039	chr12:14884330_14885039	-34811	GUCY2C	Distal Intergenic	0.726744	2.65617	4.26927	0.0388076	0.742474
peak_20399	chr14	31124069	31124850	chr14:31124069_31124850	32609	SCFD1	Intron	-0.340804	6.315	4.2702	0.0387863	0.742474
peak_24114	chr15	77160416	77161413	chr15:77160416_77161413	36331	SCAPER	Intron	0.848215	2.09709	4.27222	0.0387403	0.742474
peak_29128	chr17	42535714	42537191	chr17:42535714_42537191	43766	GPATCH8	Intron	-0.875639	3.4207	4.27261	0.0387314	0.742474
peak_32751	chr19	1788523	1789071	chr19:1788523_1789071	23204	ATP8B3	Exon	0.750904	2.50523	4.29	0.0383372	0.742474
peak_37116	chr2	9842905	9844241	chr2:9842905_9844241	-71799	YWHAQ	Distal Intergenic	0.516112	3.966	4.27981	0.0385677	0.742474
peak_39448	chr2	98692243	98692855	chr2:98692243_98692855	-10740	VWA3B	Distal Intergenic	0.623374	3.35656	4.28397	0.0384735	0.742474
peak_42716	chr2	241868123	241869060	chr2:241868123_241869060	-32550	MAB21L4	Distal Intergenic	0.715165	2.23144	4.28467	0.0384576	0.742474
peak_43345	chr20	26983304	26983785	chr20:26983304_26983785	-793435	MIR663AHG	Distal Intergenic	0.971068	2.12415	4.29267	0.038277	0.742474
peak_43562	chr20	28241544	28242067	chr20:28241544_28242067	-1369812	FRG1BP	Distal Intergenic	-0.99746	2.96448	4.27224	0.0387399	0.742474
peak_45042	chr21	8815477	8815876	chr21:8815477_8815876	-1009956	MIR3648-1	Distal Intergenic	0.762878	2.41493	4.27051	0.0387792	0.742474
peak_45663	chr21	37563166	37564987	chr21:37563166_37564987	26327	DOP1B	Intron	0.541353	3.61615	4.27038	0.0387822	0.742474
peak_52504	chr4	7965248	7965544	chr4:7965248_7965544	-23595	AFAP1	Downstream	2.20454	3.07624	4.27843	0.0385991	0.742474
peak_53499	chr4	78691935	78692271	chr4:78691935_78692271	48273	CNOT6L	Intron	0.787104	2.26896	4.282	0.0385181	0.742474
peak_58777	chr5	172462097	172462591	chr5:172462097_172462591	14368	SNORA74B	Distal Intergenic	0.836994	2.17867	4.28103	0.0385399	0.742474
peak_59605	chr6	14270901	14271555	chr6:14270901_14271555	153414	CD83	Distal Intergenic	1.7452	2.5853	4.27655	0.0386417	0.742474
peak_59882	chr6	25223593	25224233	chr6:25223593_25224233	-55073	CARMIL1	Distal Intergenic	1.00398	2.82265	4.27335	0.0387145	0.742474
peak_65237	chr7	44122759	44124252	chr7:44122759_44124252	-630	POLM	Promoter	0.681844	2.34284	4.27961	0.0385722	0.742474
peak_67160	chr7	132435090	132435678	chr7:132435090_132435678	101537	FLJ40288	Distal Intergenic	-0.306044	6.88794	4.28696	0.0384057	0.742474
peak_67895	chr7	158973473	158973754	chr7:158973473_158973754	-35824	VIPR2	Distal Intergenic	0.776581	2.54523	4.2763	0.0386474	0.742474
peak_68234	chr8	11048157	11048510	chr8:11048157_11048510	10365	XKR6	Intron	-0.303756	7.05158	4.27578	0.0386592	0.742474
peak_68270	chr8	11914562	11915040	chr8:11914562_11915040	-31807	ZNF705D	Distal Intergenic	-0.523963	5.01992	4.27828	0.0386025	0.742474
peak_70402	chr8	140463750	140465330	chr8:140463750_140465330	249969	KCNK9	Distal Intergenic	-0.277395	6.98137	4.2712	0.0387636	0.742474
peak_72910	chr9	97990224	97990487	chr9:97990224_97990487	89504	FANCC	Intron	-0.298045	6.09958	4.28418	0.0384686	0.742474
peak_24043	chr15	75153211	75153440	chr15:75153211_75153440	12230	SCAMP2	Intron	0.674637	2.48922	4.26774	0.0388425	0.742688
peak_66247	chr7	87288804	87289052	chr7:87288804_87289052	31075	RUNDC3B	Intron	-0.431771	6.83649	4.26223	0.0389686	0.744644
peak_75719	chrX	82739514	82740225	chrX:82739514_82740225	-23044	POU3F4	Distal Intergenic	-0.390273	5.12218	4.25885	0.0390464	0.745674
peak_21585	chr14	90408571	90409117	chr14:90408571_90409117	11972	EFCAB11	Intron	0.420237	4.9249	4.25744	0.0390788	0.745837
peak_69224	chr8	65800277	65801066	chr8:65800277_65801066	-88929	CYP7B1	Distal Intergenic	-0.233858	6.7867	4.253	0.0391812	0.746621
peak_69827	chr8	102410704	102413286	chr8:102410704_102413286	29583	NACA4P	Distal Intergenic	-0.652942	3.21079	4.25365	0.0391661	0.746621
peak_51736	chr3	186060237	186060534	chr3:186060237_186060534	19489	DGKG	Intron	0.699223	2.56905	4.25255	0.0391915	0.746621
peak_76276	chrX	136760009	136760378	chrX:136760009_136760378	111663	ZIC3	Distal Intergenic	1.57907	2.85021	4.24972	0.0392568	0.746702
peak_45441	chr21	33116174	33117007	chr21:33116174_33117007	-11743	SCAF4	Distal Intergenic	-0.708774	2.58876	4.24823	0.0392913	0.746702
peak_45819	chr21	43384510	43385074	chr21:43384510_43385074	-10511	C2CD2	Distal Intergenic	0.99297	2.82698	4.24871	0.0392801	0.746702
peak_49923	chr3	90849442	90849910	chr3:90849442_90849910	1692768	EPHA3	Distal Intergenic	-0.277749	6.78698	4.25006	0.039249	0.746702
peak_61975	chr6	129575248	129575762	chr6:129575248_129575762	370962	LAMA2	Intron	0.702172	2.79517	4.24516	0.0393625	0.7476
peak_31795	chr18	24013890	24016440	chr18:24013890_24016440	207481	TAF4B	Distal Intergenic	0.647285	3.05893	4.2423	0.0394288	0.748405
peak_62974	chr6	165847328	165847901	chr6:165847328_165847901	-124217	C6orf118	Intron	0.977212	2.99645	4.23885	0.039509	0.748715
peak_65257	chr7	44605989	44607628	chr7:44605989_44607628	6509	DDX56	Exon	-0.231477	6.64966	4.23893	0.039507	0.748715
peak_70456	chr8	141492278	141493158	chr8:141492278_141493158	-23600	TRAPPC9	Distal Intergenic	1.38194	2.63428	4.23747	0.0395409	0.748715
peak_26267	chr16	49492015	49492997	chr16:49492015_49492997	84207	C16orf78	Distal Intergenic	0.876116	2.10104	4.23786	0.0395319	0.748715
peak_11139	chr11	4064861	4065391	chr11:4064861_4065391	-50533	RRM1	Intron	0.820755	3.9876	4.23625	0.0395696	0.748761
peak_66788	chr7	108460104	108460403	chr7:108460104_108460403	64234	C7orf66	Distal Intergenic	-0.241729	6.74995	4.23532	0.0395913	0.748761
peak_20440	chr14	34682952	34683357	chr14:34682952_34683357	248111	SPTSSA	Distal Intergenic	1.12584	2.21529	4.22897	0.0397396	0.749299
peak_59406	chr6	6616692	6616983	chr6:6616692_6616983	6076	LY86-AS1	Intron	0.577312	3.51222	4.23236	0.0396602	0.7493
peak_69745	chr8	100314833	100315129	chr8:100314833_100315129	233829	MIR599	Intron	-0.580736	4.44218	4.23165	0.0396767	0.7493
peak_70543	chr8	143549376	143549861	chr8:143549376_143549861	3999	ADGRB1	Intron	0.596393	3.90719	4.23073	0.0396984	0.7493
peak_76480	chrX	154558018	154558728	chrX:154558018_154558728	5258	CLIC2	Intron	-0.624705	4.09686	4.22969	0.0397227	0.7493
peak_32686	chr19	1101429	1102010	chr19:1101429_1102010	-1926	GPX4	Promoter	0.780858	2.65573	4.2258	0.0398139	0.749444
peak_51582	chr3	178385382	178385591	chr3:178385382_178385591	248393	KCNMB2	Intron	-0.375105	5.5336	4.22557	0.0398192	0.749444
peak_55795	chr5	47817525	47817766	chr5:47817525_47817766	1919468	EMB	Distal Intergenic	1.31113	2.63905	4.22613	0.039806	0.749444
peak_24760	chr15	101194372	101195038	chr15:101194372_101195038	51617	ASB7	Distal Intergenic	0.891362	2.32084	4.21562	0.0400535	0.7497
peak_44996	chr21	7976167	7976808	chr21:7976167_7976808	-1849024	MIR3648-1	Distal Intergenic	1.54905	2.13723	4.21481	0.0400726	0.7497
peak_51198	chr3	152318669	152319089	chr3:152318669_152319089	-233647	P2RY1	Distal Intergenic	0.625992	2.76808	4.21997	0.0399509	0.7497
peak_56921	chr5	71445639	71446002	chr5:71445639_71446002	-19292	MIR4803	Intron	0.599748	3.54198	4.22131	0.0399194	0.7497
peak_57543	chr5	111170601	111171389	chr5:111170601_111171389	-76816	NREP-AS1	Intron	-0.316664	6.85963	4.21671	0.0400278	0.7497
peak_58765	chr5	172141393	172141766	chr5:172141393_172141766	56437	DUSP1	Distal Intergenic	2.07589	2.21318	4.2175	0.040009	0.7497
peak_58965	chr5	178145793	178146594	chr5:178145793_178146594	11109	ZNF354A	Intron	-0.732772	3.00028	4.21615	0.040041	0.7497
peak_59491	chr6	11144469	11144781	chr6:11144469_11144781	-32398	ERVFRD-1	Distal Intergenic	0.472898	4.24785	4.21784	0.040001	0.7497
peak_66339	chr7	93231501	93232867	chr7:93231501_93232867	10616	GNGT1	Intron	-0.751615	2.59086	4.22169	0.0399105	0.7497
peak_69002	chr8	45580414	45580631	chr8:45580414_45580631	-2171877	LINC00293	Distal Intergenic	-0.967027	4.11531	4.21491	0.0400702	0.7497
peak_62186	chr6	136226092	136227032	chr6:136226092_136227032	53258	PDE7B	Intron	-0.237532	7.12934	4.21155	0.0401496	0.749795
peak_64520	chr7	6706003	6707460	chr7:6706003_6707460	39106	ZNF12	Intron	0.901999	2.10853	4.21194	0.0401405	0.749795
peak_52986	chr4	41963322	41964189	chr4:41963322_41964189	-19524	DCAF4L1	Distal Intergenic	-0.291943	6.0652	4.21201	0.0401387	0.749795
peak_68841	chr8	38830558	38831275	chr8:38830558_38831275	-393	HTRA4	Promoter	-0.292902	6.0322	4.20353	0.0403399	0.750716
peak_71989	chr9	44677425	44677836	chr9:44677425_44677836	-312400	FAM27C	Distal Intergenic	0.79087	3.62852	4.20379	0.0403337	0.750716
peak_45405	chr21	31580690	31581277	chr21:31580690_31581277	2824	LINC00307	Downstream	-0.681769	2.86788	4.2034	0.040343	0.750716
peak_51759	chr3	186772063	186773459	chr3:186772063_186773459	83804	RPL39L	Intron	0.851682	2.1051	4.20572	0.0402878	0.750716
peak_55635	chr5	47366722	47368545	chr5:47366722_47368545	-1670502	HCN1	Distal Intergenic	-0.676342	2.6593	4.2068	0.0402622	0.750716
peak_56368	chr5	49358735	49359030	chr5:49358735_49359030	378204	EMB	Distal Intergenic	0.999882	2.40328	4.20399	0.040329	0.750716
peak_24000	chr15	74489697	74490519	chr15:74489697_74490519	11527	STRA6	5' UTR	-0.279733	7.50777	4.20168	0.0403839	0.751029
peak_25841	chr16	28087586	28087837	chr16:28087586_28087837	-12756	GSG1L	Distal Intergenic	0.746878	4.16976	4.20036	0.0404154	0.751032
peak_41790	chr2	206873514	206873819	chr2:206873514_206873819	77087	INO80D	Intron	0.765409	2.37229	4.19966	0.040432	0.751032
peak_12299	chr11	61070540	61071885	chr11:61070540_61071885	-7752	VWCE	Exon	0.398046	5.82763	4.19051	0.0406508	0.752105
peak_34483	chr19	25777935	25778156	chr19:25777935_25778156	-1431686	HAVCR1P1	Distal Intergenic	0.769473	2.34894	4.18519	0.0407785	0.752105
peak_44924	chr21	5303811	5304308	chr21:5303811_5304308	-4521524	MIR3648-1	Distal Intergenic	0.845192	2.82847	4.19417	0.0405632	0.752105
peak_53693	chr4	88211910	88212466	chr4:88211910_88212466	9269	MIR5705	Distal Intergenic	0.816835	2.62273	4.18826	0.0407049	0.752105
peak_54928	chr4	185597595	185598011	chr4:185597595_185598011	26828	PRIMPOL	Intron	-0.852945	4.58751	4.19316	0.0405873	0.752105
peak_55893	chr5	48068212	48068750	chr5:48068212_48068750	1668484	EMB	Distal Intergenic	0.623163	3.50532	4.19299	0.0405915	0.752105
peak_67388	chr7	141975927	141976686	chr7:141975927_141976686	-3859	NA	Distal Intergenic	-0.338998	6.02951	4.18581	0.0407636	0.752105
peak_68160	chr8	8187655	8187974	chr8:8187655_8187974	51283	PRAG1	Intron	-0.538896	3.9142	4.18737	0.0407262	0.752105
peak_68633	chr8	27837398	27838348	chr8:27837398_27838348	12021	SCARA5	Intron	-0.673032	2.48035	4.18588	0.0407622	0.752105
peak_75139	chrX	45335294	45335906	chrX:45335294_45335906	-254082	LOC392452	Distal Intergenic	-0.588775	3.50315	4.18782	0.0407155	0.752105
peak_75331	chrX	53433844	53434906	chrX:53433844_53434906	14712	SMC1A	Intron	-0.317187	6.03206	4.19133	0.0406311	0.752105
peak_76133	chrX	131711026	131711274	chrX:131711026_131711274	-87030	MBNL3	Distal Intergenic	-0.410945	4.9257	4.19602	0.0405189	0.752105
peak_48314	chr3	17179768	17180207	chr3:17179768_17180207	205080	MIR3714	Distal Intergenic	-0.233645	7.54981	4.17992	0.0409055	0.754003
peak_45490	chr21	33968037	33968652	chr21:33968037_33968652	-10192	TCP10L	Intron	-0.738821	2.49962	4.17843	0.0409416	0.754223
peak_59789	chr6	21968121	21968638	chr6:21968121_21968638	178784	NBAT1	Intron	0.613146	3.79085	4.17536	0.0410159	0.755146
peak_23689	chr15	65077556	65078330	chr15:65077556_65078330	-9786	RBPMS2	Distal Intergenic	0.822852	2.62016	4.17137	0.0411126	0.756357
peak_58034	chr5	135759290	135760389	chr5:135759290_135760389	-58126	TRPC7	Distal Intergenic	2.59579	4.37908	4.17065	0.04113	0.756357
peak_53106	chr4	50583050	50583318	chr4:50583050_50583318	1594785	CWH43	Distal Intergenic	0.756396	2.45059	4.16909	0.041168	0.756609
peak_68053	chr8	1791744	1792431	chr8:1791744_1792431	19595	ARHGEF10	Intron	0.678541	3.79476	4.16793	0.0411961	0.756682
peak_48946	chr3	45037428	45038174	chr3:45037428_45038174	-19754	ZDHHC3	Intron	0.942214	2.34272	4.16642	0.0412328	0.756911
peak_62167	chr6	135675789	135676320	chr6:135675789_135676320	142583	AHI1	Intron	-0.445243	6.22734	4.16397	0.0412925	0.757562
peak_58004	chr5	134737683	134739703	chr5:134737683_134739703	-2106	H2AFY	Promoter	1.29765	3.88959	4.16277	0.0413217	0.757654
peak_70388	chr8	136530402	136530793	chr8:136530402_136530793	60686	KHDRBS3	Intron	-0.70899	2.98442	4.15921	0.0414086	0.758048
peak_72990	chr9	101459096	101459620	chr9:101459096_101459620	11859	GABBR2	Intron	-0.692273	2.46674	4.15891	0.0414159	0.758048
peak_37512	chr2	27716446	27717257	chr2:27716446_27717257	869	FNDC4	Exon	1.15879	3.11285	4.16056	0.0413757	0.758048
peak_75019	chrX	40104813	40107671	chrX:40104813_40107671	-68231	BCOR	Distal Intergenic	-0.514068	4.1724	4.15535	0.0415031	0.759198
peak_19035	chr13	48129063	48129554	chr13:48129063_48129554	-482149	NUDT15	Distal Intergenic	1.43404	3.02192	4.14718	0.041704	0.75983
peak_28402	chr17	25075368	25075784	chr17:25075368_25075784	545238	MIR4522	Distal Intergenic	-0.857772	2.47338	4.14804	0.0416827	0.75983
peak_46465	chr22	20346320	20346997	chr22:20346320_20346997	20730	NA	Intron	0.613176	2.79645	4.1485	0.0416715	0.75983
peak_52948	chr4	40256888	40257802	chr4:40256888_40257802	58361	RHOH	Distal Intergenic	0.807765	2.15573	4.14702	0.0417078	0.75983
peak_62534	chr6	149264418	149265032	chr6:149264418_149265032	20788	UST-AS1	Intron	0.455308	4.29859	4.15159	0.0415954	0.75983
peak_64856	chr7	27143085	27143532	chr7:27143085_27143532	-691	HOXA2	Promoter	-0.230083	6.66815	4.14902	0.0416587	0.75983
peak_66376	chr7	97835519	97835778	chr7:97835519_97835778	-5790	BHLHA15	3' UTR	-0.634333	4.56729	4.15159	0.0415955	0.75983
peak_60058	chr6	28713188	28713986	chr6:28713188_28713986	-229618	GPX6	Distal Intergenic	1.11762	2.50814	4.14323	0.0418014	0.761091
peak_54619	chr4	155666882	155668307	chr4:155666882_155668307	1730	LRAT	Intron	1.28982	2.23301	4.14117	0.0418523	0.761575
peak_70347	chr8	133453314	133453950	chr8:133453314_133453950	39054	KCNQ3	Intron	0.88079	3.18322	4.13907	0.0419042	0.762077
peak_50422	chr3	112793534	112793970	chr3:112793534_112793970	-54979	NEPRO	Distal Intergenic	0.443533	4.54951	4.13799	0.0419309	0.762118
peak_62126	chr6	134569857	134570318	chr6:134569857_134570318	68878	SGK1	Intron	1.40779	2.57294	4.13677	0.0419611	0.762224
peak_33723	chr19	15352760	15353056	chr19:15352760_15353056	-8902	EPHX3	Intron	0.597809	4.18396	4.12886	0.0421577	0.762252
peak_48373	chr3	18656546	18656940	chr3:18656546_18656940	-176281	SATB1	Distal Intergenic	0.63653	2.35864	4.13297	0.0420555	0.762252
peak_56178	chr5	48872081	48872322	chr5:48872081_48872322	864912	EMB	Distal Intergenic	0.805645	2.53757	4.13	0.0421293	0.762252
peak_6364	chr1	204565615	204566470	chr1:204565615_204566470	80108	MDM4	Exon	0.677553	2.66174	4.12945	0.0421431	0.762252
peak_60581	chr6	42039179	42040391	chr6:42039179_42040391	20928	TAF8	Exon	-0.232126	6.74745	4.1295	0.0421418	0.762252
peak_62619	chr6	151379922	151381117	chr6:151379922_151381117	-180017	AKAP12	Intron	0.677596	3.08006	4.13012	0.0421262	0.762252
peak_72905	chr9	97938014	97938845	chr9:97938014_97938845	-89638	MIR3074	Intron	0.604894	3.79037	4.13082	0.042109	0.762252
peak_73905	chr9	136117747	136119737	chr9:136117747_136119737	30893	ABO	Distal Intergenic	-0.305777	5.59996	4.13309	0.0420525	0.762252
peak_21598	chr14	90836283	90836852	chr14:90836283_90836852	-26475	CALM1	Distal Intergenic	-0.490083	4.10905	4.11896	0.0424052	0.764708
peak_35030	chr19	28501134	28501526	chr19:28501134_28501526	-216286	LINC00662	Distal Intergenic	-0.300429	6.21093	4.11262	0.0425645	0.764708
peak_36218	chr19	51169193	51169760	chr19:51169193_51169760	16491	C19orf81	Exon	-0.983961	3.3641	4.1141	0.0425272	0.764708
peak_36285	chr19	53254341	53255439	chr19:53254341_53255439	-16034	ZNF611	Distal Intergenic	-0.613374	5.03294	4.11772	0.0424364	0.764708
peak_49076	chr3	47788356	47789928	chr3:47788356_47789928	33668	SMARCC1	Intron	0.67676	2.30181	4.11386	0.0425332	0.764708
peak_49881	chr3	90609766	90610714	chr3:90609766_90610714	1453092	EPHA3	Distal Intergenic	0.585126	3.90336	4.11918	0.0423995	0.764708
peak_51380	chr3	166864857	166865205	chr3:166864857_166865205	232880	ZBBX	Distal Intergenic	-0.316127	7.15332	4.11269	0.0425627	0.764708
peak_52864	chr4	38666702	38667666	chr4:38666702_38667666	-272	KLF3-AS1	Promoter	0.940428	2.25952	4.11137	0.0425958	0.764708
peak_54150	chr4	118888700	118889179	chr4:118888700_118889179	-65594	NDST3	Distal Intergenic	-0.267583	6.63421	4.12183	0.0423333	0.764708
peak_57700	chr5	119435425	119436042	chr5:119435425_119436042	-363977	PRR16	Distal Intergenic	-0.619258	2.79239	4.11609	0.0424771	0.764708
peak_9614	chr10	75022365	75022646	chr10:75022365_75022646	-9914	MRPS16	Intron	0.557869	3.09559	4.11782	0.0424337	0.764708
peak_70302	chr8	131903483	131905062	chr8:131903483_131905062	147773	ADCY8	Intron	-0.486773	4.29178	4.11296	0.0425558	0.764708
peak_70590	chr8	144060230	144061229	chr8:144060230_144061229	-16016	CDC42P3	Downstream	0.590936	3.29307	4.11075	0.0426115	0.764708
peak_65098	chr7	37920515	37921618	chr7:37920515_37921618	32316	NME8	Intron	0.65098	2.55745	4.10934	0.042647	0.764907
peak_6568	chr1	208021572	208022024	chr1:208021572_208022024	29848	LOC148696	Distal Intergenic	1.04793	2.17786	4.09593	0.0429867	0.765367
peak_7860	chr10	11225906	11227433	chr10:11225906_11227433	-78455	CELF2-AS2	Intron	0.949803	2.13187	4.08251	0.0433292	0.765367
peak_60040	chr6	28355634	28356539	chr6:28355634_28356539	11005	ZSCAN12	Intron	2.08235	3.56643	4.09027	0.0431309	0.765367
peak_61455	chr6	100464957	100465390	chr6:100464957_100465390	-22843	MCHR2	Intron	-0.245444	6.72189	4.07304	0.0435728	0.765367
peak_62374	chr6	142746518	142747057	chr6:142746518_142747057	123462	ADGRG6	Intron	0.732	2.23716	4.10399	0.0427821	0.765367
peak_65454	chr7	57714574	57714875	chr7:57714574_57714875	204691	ZNF716	Distal Intergenic	-0.695759	3.50147	4.08603	0.0432392	0.765367
peak_66357	chr7	96075376	96076488	chr7:96075376_96076488	56347	NA	Distal Intergenic	0.28461	6.83348	4.09706	0.0429579	0.765367
peak_66892	chr7	116589020	116589272	chr7:116589020_116589272	-4109	ST7	Distal Intergenic	-0.254562	6.43424	4.09181	0.0430915	0.765367
peak_69077	chr8	56202297	56202611	chr8:56202297_56202611	165270	SBF1P1	Intron	-0.22249	6.54128	4.0971	0.0429567	0.765367
peak_69712	chr8	98513347	98513626	chr8:98513347_98513626	-142781	MTDH	Distal Intergenic	-1.01125	4.74976	4.09726	0.0429527	0.765367
peak_71052	chr9	20321390	20322414	chr9:20321390_20322414	88822	MIR4473	Distal Intergenic	0.462045	4.31531	4.0867	0.0432219	0.765367
peak_71408	chr9	37409177	37409488	chr9:37409177_37409488	-13193	GRHPR	Distal Intergenic	-0.420991	4.9175	4.07851	0.043432	0.765367
peak_71964	chr9	44565085	44565821	chr9:44565085_44565821	-424415	FAM27C	Distal Intergenic	-0.246259	6.42129	4.08424	0.0432848	0.765367
peak_72270	chr9	65762116	65762318	chr9:65762116_65762318	-267730	FAM74A4	Distal Intergenic	-0.233109	6.63127	4.07377	0.043554	0.765367
peak_72971	chr9	99955905	99956138	chr9:99955905_99956138	-44570	SUGT1P4-STRA6LP	Distal Intergenic	-0.654002	4.06867	4.07302	0.0435733	0.765367
peak_76230	chrX	136143906	136144132	chrX:136143906_136144132	-30073	GPR101	Distal Intergenic	1.53269	2.17702	4.09574	0.0429913	0.765367
peak_19956	chr13	114268614	114269021	chr13:114268614_114269021	29611	TFDP1	Intron	0.635043	2.49447	4.07338	0.0435639	0.765367
peak_22583	chr15	18684871	18685651	chr15:18684871_18685651	-1802346	CHEK2P2	Distal Intergenic	0.389297	5.07513	4.08528	0.0432583	0.765367
peak_29756	chr17	58366141	58366368	chr17:58366141_58366368	-57135	SCARNA20	Intron	0.631182	2.55469	4.08249	0.0433298	0.765367
peak_30134	chr17	67963126	67963694	chr17:67963126_67963694	-107672	KCNJ16	Distal Intergenic	0.763575	2.24501	4.07187	0.0436031	0.765367
peak_32192	chr18	58400102	58400973	chr18:58400102_58400973	-360101	MC4R	Distal Intergenic	-0.256068	6.92321	4.07481	0.0435272	0.765367
peak_37665	chr2	36548849	36549746	chr2:36548849_36549746	32967	CRIM1-DT	Distal Intergenic	1.47888	5.87526	4.09704	0.0429584	0.765367
peak_39748	chr2	108944852	108945058	chr2:108944852_108945058	6158	SULT1C2P1	Intron	1.31144	2.22734	4.07671	0.0434781	0.765367
peak_39875	chr2	112367303	112367541	chr2:112367303_112367541	-114611	MIR4435-2HG	Distal Intergenic	1.36306	2.20197	4.07659	0.0434813	0.765367
peak_42102	chr2	223727655	223727888	chr2:223727655_223727888	1923	ACSL3	Intron	0.78827	2.35862	4.09165	0.0430955	0.765367
peak_43047	chr20	10674018	10674911	chr20:10674018_10674911	-19324	JAG1	Distal Intergenic	-0.223372	7.40338	4.10283	0.0428114	0.765367
peak_46768	chr22	28663648	28663945	chr22:28663648_28663945	-347048	MIR3199-1	Intron	-0.65795	4.09164	4.08607	0.0432382	0.765367
peak_47552	chr22	46148980	46151973	chr22:46148980_46151973	-4431	MIR4762	Intron	0.718925	2.47141	4.09395	0.0430369	0.765367
peak_50017	chr3	92134829	92135149	chr3:92134829_92135149	1557785	PROS1	Distal Intergenic	0.573658	4.31124	4.10694	0.0427076	0.765367
peak_50695	chr3	128051594	128053125	chr3:128051594_128053125	-129312	DNAJB8-AS1	Intron	-0.667215	3.02047	4.08453	0.0432774	0.765367
peak_51151	chr3	151230629	151230877	chr3:151230629_151230877	52906	MIR5186	Distal Intergenic	-0.988403	5.75686	4.07476	0.0435283	0.765367
peak_51790	chr3	187247416	187247624	chr3:187247416_187247624	140577	SST	Distal Intergenic	0.714706	5.51071	4.09512	0.0430071	0.765367
peak_52385	chr4	3345997	3346564	chr4:3345997_3346564	51242	RGS12	Intron	0.769022	2.29156	4.0912	0.0431069	0.765367
peak_52870	chr4	38692208	38692509	chr4:38692208_38692509	-25778	KLF3-AS1	3' UTR	0.910833	3.28469	4.07268	0.0435821	0.765367
peak_56264	chr5	49094169	49094473	chr5:49094169_49094473	642761	EMB	Distal Intergenic	0.725572	3.00177	4.10146	0.0428461	0.765367
peak_56293	chr5	49172508	49173551	chr5:49172508_49173551	563683	EMB	Distal Intergenic	0.632113	2.71461	4.08107	0.0433661	0.765367
peak_56358	chr5	49336180	49338310	chr5:49336180_49338310	398924	EMB	Distal Intergenic	-0.261705	7.01947	4.09498	0.0430107	0.765367
peak_56425	chr5	50006960	50007222	chr5:50006960_50007222	45227	PARP8	Intron	0.388152	5.07915	4.08982	0.0431423	0.765367
peak_37277	chr2	16257459	16257969	chr2:16257459_16257969	-175614	MYCNOS	Distal Intergenic	0.911564	2.33627	4.07022	0.0436457	0.765686
peak_60742	chr6	45494690	45495189	chr6:45494690_45495189	-148902	SUPT3H	Intron	0.808086	2.35452	4.06832	0.0436948	0.766117
peak_70910	chr9	5557623	5558820	chr9:5557623_5558820	47078	PDCD1LG2	Exon	-0.261518	6.74608	4.0648	0.0437858	0.767282
peak_69796	chr8	101051588	101052112	chr8:101051588_101052112	66232	RGS22	Intron	0.765723	2.89823	4.06114	0.0438808	0.767656
peak_71500	chr9	41223894	41224685	chr9:41223894_41224685	102712	NA	Distal Intergenic	1.19652	2.98997	4.06197	0.0438594	0.767656
peak_56164	chr5	48828135	48828599	chr5:48828135_48828599	908635	EMB	Distal Intergenic	-0.462722	5.07903	4.06183	0.043863	0.767656
peak_48326	chr3	17805959	17806629	chr3:17805959_17806629	-21719	TBC1D5	Distal Intergenic	1.44586	2.27904	4.05917	0.043932	0.768122
peak_59307	chr6	3180018	3180268	chr6:3180018_3180268	15733	LINC02525	Downstream	-0.266088	6.32068	4.04742	0.0442388	0.768913
peak_59920	chr6	26171213	26173588	chr6:26171213_26173588	-10436	HIST1H2BE	3' UTR	-0.252418	6.75341	4.05052	0.0441578	0.768913
peak_60898	chr6	58595801	58596057	chr6:58595801_58596057	-308077	GUSBP4	Distal Intergenic	1.19476	4.37268	4.05216	0.0441148	0.768913
peak_66456	chr7	100130835	100131210	chr7:100130835_100131210	-5624	AGFG2	Distal Intergenic	0.844887	2.81663	4.05025	0.0441648	0.768913
peak_66773	chr7	107874593	107876027	chr7:107874593_107876027	-103792	LAMB4	Exon	-0.689545	3.71731	4.04708	0.0442478	0.768913
peak_3477	chr1	120081232	120081831	chr1:120081232_120081831	-24672	HSD3BP4	Distal Intergenic	0.454796	4.29285	4.04881	0.0442024	0.768913
peak_15328	chr12	35135108	35136101	chr12:35135108_35136101	959892	ALG10	Distal Intergenic	-0.617117	3.14854	4.04843	0.0442123	0.768913
peak_29398	chr17	47978338	47978664	chr17:47978338_47978664	-52959	TAC4	Distal Intergenic	0.847259	2.13036	4.05646	0.0440026	0.768913
peak_54182	chr4	121156896	121157629	chr4:121156896_121157629	-168883	MAD2L1	Distal Intergenic	0.599888	3.03694	4.04714	0.0442462	0.768913
peak_57112	chr5	80150726	80151204	chr5:80150726_80151204	-105304	RASGRF2	Intron	0.719931	4.53015	4.05001	0.0441711	0.768913
peak_58097	chr5	138792194	138792693	chr5:138792194_138792693	-16980	DNAJC18	Intron	0.70175	2.24893	4.05552	0.0440273	0.768913
peak_26189	chr16	36897822	36898031	chr16:36897822_36898031	1916899	LINC02167	Distal Intergenic	0.990791	2.12672	4.04318	0.0443501	0.769409
peak_53577	chr4	82043980	82044720	chr4:82043980_82044720	91498	PRKG2	Intron	0.513097	3.88189	4.04354	0.0443407	0.769409
peak_56995	chr5	75642347	75642699	chr5:75642347_75642699	-56450	IQGAP2	Distal Intergenic	0.879305	3.56287	4.04438	0.0443186	0.769409
peak_67387	chr7	141926106	141926317	chr7:141926106_141926317	20569	MOXD2P	Distal Intergenic	-0.591161	2.91131	4.04166	0.0443901	0.769675
peak_46833	chr22	30275623	30276475	chr22:30275623_30276475	-2683	MTMR3	Distal Intergenic	-0.220518	8.11676	4.0406	0.0444181	0.769733
peak_48815	chr3	41881328	41881683	chr3:41881328_41881683	121977	ULK4	Intron	0.769284	2.38872	4.03913	0.0444568	0.769978
peak_61881	chr6	122471015	122472343	chr6:122471015_122472343	-248353	HSF2	Distal Intergenic	-0.588262	4.60712	4.03776	0.0444927	0.770173
peak_39790	chr2	109980751	109981347	chr2:109980751_109981347	-50670	MIR4266	Intron	0.690682	3.2676	4.03629	0.0445317	0.770421
peak_60571	chr6	41970491	41971321	chr6:41970491_41971321	45289	CCND3	Intron	-0.281362	5.73294	4.02996	0.0446991	0.772889
peak_65506	chr7	58526923	58527942	chr7:58526923_58527942	1017040	ZNF716	Distal Intergenic	-0.458554	4.24442	4.0281	0.0447484	0.773314
peak_69402	chr8	80121745	80123180	chr8:80121745_80123180	-399869	STMN2	Distal Intergenic	-0.345506	5.47453	4.02685	0.0447815	0.773459
peak_75485	chrX	66037804	66039017	chrX:66037804_66039017	-178664	EDA2R	Distal Intergenic	1.65067	3.52901	4.02348	0.0448711	0.773723
peak_45855	chr21	44011705	44014152	chr21:44011705_44014152	-59710	PDE9A	Distal Intergenic	-0.369381	5.16863	4.02425	0.0448506	0.773723
peak_51129	chr3	150739575	150740332	chr3:150739575_150740332	-48789	CLRN1	Intron	0.644214	4.18378	4.02458	0.0448417	0.773723
peak_56709	chr5	58499934	58500148	chr5:58499934_58500148	620995	RAB3C	Intron	1.31323	2.2345	4.01873	0.0449976	0.775476
peak_60872	chr6	56953826	56956085	chr6:56953826_56956085	0	ZNF451	Promoter	-0.499515	4.21335	4.01762	0.0450273	0.775561
peak_30305	chr17	75012184	75013468	chr17:75012184_75013468	-69330	SNHG20	Distal Intergenic	0.861332	2.139	4.01516	0.0450931	0.776266
peak_60100	chr6	30494483	30494909	chr6:30494483_30494909	-2010913	GPX6	Distal Intergenic	0.656589	2.60164	4.01099	0.0452047	0.777759
peak_74531	chrX	1462574	1463531	chrX:1462574_1463531	1069857	LINC00102	Intron	-0.269474	5.66481	4.00657	0.0453231	0.779223
peak_75428	chrX	61120671	61120964	chrX:61120671_61120964	1450254	SPIN4	Distal Intergenic	-0.329639	5.94775	4.00519	0.0453604	0.779223
peak_11221	chr11	7577884	7578277	chr11:7577884_7578277	42888	PPFIBP2	Intron	0.687926	2.18082	4.00504	0.0453645	0.779223
peak_73468	chr9	127557310	127557912	chr9:127557310_127557912	17873	OLFML2A	Exon	-0.277349	5.85888	4.00297	0.0454201	0.779749
peak_71341	chr9	35826062	35826602	chr9:35826062_35826602	2142	FAM221B	Exon	-0.466983	4.21422	3.99555	0.0456206	0.782762
peak_59620	chr6	14660621	14661734	chr6:14660621_14661734	543134	CD83	Distal Intergenic	-0.254493	6.82529	3.99342	0.0456783	0.782998
peak_61911	chr6	125858590	125858938	chr6:125858590_125858938	-136561	LINC02523	Distal Intergenic	-0.271444	5.82557	3.99319	0.0456845	0.782998
peak_54653	chr4	159175381	159176213	chr4:159175381_159176213	43980	TMEM144	3' UTR	0.772209	4.57028	3.99174	0.0457238	0.783242
peak_65826	chr7	60642022	60642758	chr7:60642022_60642758	2121676	ZNF733P	Distal Intergenic	-0.304698	6.81029	3.98998	0.0457715	0.78363
peak_39872	chr2	112259316	112260051	chr2:112259316_112260051	-6624	MIR4435-2HG	Distal Intergenic	-0.775018	3.44499	3.98629	0.0458719	0.783633
peak_53633	chr4	83340792	83341338	chr4:83340792_83341338	10040	HNRNPDL	Downstream	0.431511	4.56213	3.98754	0.0458379	0.783633
peak_54937	chr4	186298297	186298518	chr4:186298297_186298518	1634	LRP2BP	Intron	0.732185	2.34607	3.98676	0.045859	0.783633
peak_75730	chrX	86147852	86148953	chrX:86147852_86148953	-623762	KLHL4	Distal Intergenic	0.574978	4.09213	3.98685	0.0458567	0.783633
peak_72908	chr9	97969816	97970835	chr9:97969816_97970835	109156	FANCC	Intron	-0.286046	5.83699	3.97876	0.0460774	0.786713
peak_76115	chrX	130120433	130121394	chrX:130120433_130121394	-70822	ARHGAP36	Distal Intergenic	-0.463246	5.52891	3.97584	0.0461574	0.78679
peak_17858	chr12	122089042	122089609	chr12:122089042_122089609	20928	MORN3	3' UTR	0.903515	2.22913	3.97588	0.0461562	0.78679
peak_38926	chr2	92232414	92232866	chr2:92232414_92232866	103255	ACTR3BP2	Distal Intergenic	0.784401	2.65149	3.97661	0.0461362	0.78679
peak_70377	chr8	134691068	134691748	chr8:134691068_134691748	-106885	ST3GAL1	Distal Intergenic	-0.326339	5.8888	3.97384	0.0462124	0.787298
peak_42034	chr2	219244976	219246110	chr2:219244976_219246110	-642	SLC11A1	Promoter	0.754058	2.31658	3.9697	0.0463259	0.787516
peak_48868	chr3	43060521	43061093	chr3:43060521_43061093	39762	GASK1A	Intron	0.835627	2.78462	3.96995	0.0463192	0.787516
peak_68310	chr8	12713396	12714265	chr8:12713396_12714265	-44486	LOC340357	Distal Intergenic	-0.282533	6.11284	3.97062	0.0463006	0.787516
peak_71636	chr9	43649044	43649870	chr9:43649044_43649870	-18314	SPATA31A6	Distal Intergenic	0.392101	5.51	3.97115	0.0462861	0.787516
peak_53130	chr4	51148621	51149543	chr4:51148621_51149543	-1559733	DCUN1D4	Distal Intergenic	0.518326	3.83174	3.9681	0.0463699	0.787835
peak_37917	chr2	44942436	44943000	chr2:44942436_44943000	-165777	MIR548AD	Exon	-0.300664	7.05243	3.9613	0.0465576	0.78888
peak_43591	chr20	28494740	28498071	chr20:28494740_28498071	-1113808	FRG1BP	Distal Intergenic	-0.403513	4.68478	3.96137	0.0465559	0.78888
peak_50219	chr3	105746297	105747306	chr3:105746297_105747306	-158031	CBLB	Distal Intergenic	0.813479	2.10842	3.96308	0.0465084	0.78888
peak_57316	chr5	93801407	93801689	chr5:93801407_93801689	152620	KIAA0825	Intron	0.581093	3.22697	3.9641	0.0464803	0.78888
peak_62266	chr6	137939802	137940426	chr6:137939802_137940426	-124271	OLIG3	Distal Intergenic	0.929721	3.24015	3.96207	0.0465364	0.78888
peak_28726	chr17	34579197	34581242	chr17:34579197_34581242	10790	TBC1D3C	3' UTR	0.612744	2.64451	3.94209	0.0470922	0.793452
peak_34447	chr19	25685067	25685532	chr19:25685067_25685532	-1338818	HAVCR1P1	Distal Intergenic	1.15487	2.74157	3.94693	0.0469569	0.793452
peak_39450	chr2	98702116	98702601	chr2:98702116_98702601	-994	VWA3B	Promoter	0.569698	3.56658	3.93977	0.0471574	0.793452
peak_42833	chr20	2379466	2379889	chr20:2379466_2379889	17912	TGM6	Intron	-0.28723	7.8818	3.94006	0.0471492	0.793452
peak_57536	chr5	110738252	110739821	chr5:110738252_110739821	-108103	STARD4-AS1	Intron	0.940637	2.25523	3.94276	0.0470734	0.793452
peak_57889	chr5	132456044	132457942	chr5:132456044_132457942	68382	HSPA4	Distal Intergenic	0.609432	2.89905	3.94388	0.0470421	0.793452
peak_58471	chr5	151319089	151319526	chr5:151319089_151319526	-14692	GLRA1	Distal Intergenic	-1.05677	4.18877	3.94041	0.0471394	0.793452
peak_64703	chr7	22174194	22174593	chr7:22174194_22174593	-188652	CDCA7L	Intron	-0.409209	5.24373	3.94879	0.0469052	0.793452
peak_66140	chr7	76357635	76359990	chr7:76357635_76359990	-101015	POMZP3	Distal Intergenic	0.735679	2.63874	3.94772	0.046935	0.793452
peak_66290	chr7	91082335	91083496	chr7:91082335_91083496	188552	FZD1	Distal Intergenic	0.669659	4.20675	3.94331	0.047058	0.793452
peak_71810	chr9	44112867	44114113	chr9:44112867_44114113	427982	CNTNAP3B	Distal Intergenic	0.501336	4.43914	3.94696	0.0469562	0.793452
peak_73853	chr9	133955854	133956431	chr9:133955854_133956431	-15432	AIF1L	Intron	0.538918	4.88486	3.94138	0.0471121	0.793452
peak_74598	chrX	7068772	7069479	chrX:7068772_7069479	-2541	PUDP	Intron	0.636827	3.6028	3.94663	0.0469655	0.793452
peak_61085	chr6	67662560	67662878	chr6:67662560_67662878	1164788	SLC25A51P1	Distal Intergenic	1.4328	2.49743	3.9369	0.0472379	0.794379
peak_68060	chr8	1992125	1992382	chr8:1992125_1992382	-776	MYOM2	Promoter	-0.232631	6.75783	3.93222	0.0473693	0.795305
peak_28333	chr17	21680958	21681184	chr17:21680958_21681184	-144186	FAM27E5	Distal Intergenic	-0.304751	6.89266	3.93283	0.0473522	0.795305
peak_45593	chr21	36155713	36157570	chr21:36155713_36157570	37591	LINC01426	Exon	0.946561	2.10119	3.93292	0.0473497	0.795305
peak_29969	chr17	64501013	64501383	chr17:64501013_64501383	202087	PRKCA	Intron	0.761563	2.11359	3.92873	0.0474677	0.796103
peak_61796	chr6	116877248	116877454	chr6:116877248_116877454	-10475	TRAPPC3L	Intron	-0.63739	3.8868	3.92963	0.0474425	0.796103
peak_56248	chr5	49054701	49054971	chr5:49054701_49054971	682263	EMB	Distal Intergenic	0.702625	2.62654	3.92735	0.0475067	0.796329
peak_21654	chr14	91468650	91469055	chr14:91468650_91469055	57938	RPS6KA5	Intron	0.650604	2.5496	3.92399	0.0476016	0.797493
peak_41178	chr2	187581457	187581758	chr2:187581457_187581758	22668	FAM171B	Intron	1.2479	2.25956	3.92031	0.0477061	0.798816
peak_44882	chr20	64092185	64093417	chr20:64092185_64093417	1170447	LINC00266-1	Distal Intergenic	0.611871	2.65706	3.91621	0.0478225	0.800335
peak_74573	chrX	2710197	2710837	chrX:2710197_2710837	-36026	GYG2	Intron	-0.311562	5.75003	3.90726	0.0480779	0.804179
peak_56684	chr5	57117556	57118143	chr5:57117556_57118143	-338920	ACTBL2	Distal Intergenic	1.05041	2.68225	3.90216	0.048224	0.80599
peak_57388	chr5	96960759	96961607	chr5:96960759_96961607	-441754	RIOK2	Distal Intergenic	0.336036	5.17841	3.90169	0.0482377	0.80599
peak_50743	chr3	128845464	128846795	chr3:128845464_128846795	-4471	RAB43	3' UTR	-0.286267	6.80866	3.89891	0.0483175	0.806891
peak_66096	chr7	75452188	75453141	chr7:75452188_75453141	-9096	CCL24	Distal Intergenic	1.67792	5.141	3.89539	0.0484188	0.807148
peak_67819	chr7	157490308	157491179	chr7:157490308_157491179	-123194	MIR153-2	Intron	-0.651975	3.25319	3.89389	0.0484619	0.807148
peak_5123	chr1	156281363	156283417	chr1:156281363_156283417	-11935	VHLL	Exon	0.700951	2.23652	3.8941	0.0484559	0.807148
peak_38972	chr2	92410729	92413433	chr2:92410729_92413433	281570	ACTR3BP2	Distal Intergenic	0.627991	3.11558	3.89712	0.0483689	0.807148
peak_49635	chr3	71152172	71152793	chr3:71152172_71152793	438447	MIR1284	Intron	0.755085	4.15746	3.89561	0.0484125	0.807148
peak_48804	chr3	40524175	40525489	chr3:40524175_40525489	5571	ZNF619	Exon	0.519629	3.99806	3.8924	0.048505	0.807436
peak_56304	chr5	49208351	49208728	chr5:49208351_49208728	528506	EMB	Distal Intergenic	0.922787	2.21771	3.88849	0.0486181	0.808887
peak_62689	chr6	154684042	154684555	chr6:154684042_154684555	147198	CNKSR3	Intron	0.896643	3.14049	3.88329	0.0487687	0.809202
peak_65883	chr7	65223771	65224334	chr7:65223771_65224334	3258	SNORA22	Exon	-0.550562	3.32756	3.88159	0.0488182	0.809202
peak_73485	chr9	127784730	127786990	chr9:127784730_127786990	-81344	GOLGA1	Intron	0.611454	3.50669	3.88248	0.0487924	0.809202
peak_23581	chr15	63578246	63578585	chr15:63578246_63578585	8497	APH1B	Intron	-0.79309	2.21918	3.8841	0.0487455	0.809202
peak_38057	chr2	54572217	54573291	chr2:54572217_54573291	14146	C2orf73	Intron	-0.272459	6.4972	3.88453	0.0487329	0.809202
peak_40283	chr2	137952647	137952996	chr2:137952647_137952996	429532	THSD7B	Intron	0.806157	2.25879	3.884	0.0487484	0.809202
peak_42234	chr2	230326614	230327988	chr2:230326614_230327988	-190557	PID1	Intron	-0.223076	8.21771	3.88363	0.0487591	0.809202
peak_68910	chr8	42355307	42356565	chr8:42355307_42356565	-39733	SMIM19	Intron	-0.492178	4.82499	3.87954	0.0488779	0.809333
peak_49362	chr3	56788829	56789047	chr3:56788829_56789047	-71694	TASOR	5' UTR	-0.418606	4.82178	3.88015	0.0488602	0.809333
peak_32182	chr18	58121845	58122221	chr18:58121845_58122221	-81844	MC4R	Distal Intergenic	-0.777642	4.31383	3.87758	0.0489351	0.809851
peak_31290	chr18	3069849	3070126	chr18:3069849_3070126	-57904	LPIN2	Intron	0.696812	2.1489	3.87627	0.0489732	0.810052
peak_64940	chr7	30329967	30331211	chr7:30329967_30331211	-461	MIR550B1	Promoter	1.3275	2.51039	3.87244	0.0490852	0.811048
peak_65877	chr7	65005965	65007564	chr7:65005965_65007564	-105213	INTS4P2	Distal Intergenic	0.755736	2.99411	3.87311	0.0490656	0.811048
peak_45563	chr21	35226824	35227974	chr21:35226824_35227974	56729	DONSON	Intron	0.664812	2.22249	3.86856	0.0491988	0.811582
peak_58254	chr5	142053243	142053879	chr5:142053243_142053879	23756	FGF1	Intron	-0.223286	7.28525	3.86866	0.0491957	0.811582
peak_67821	chr7	157513608	157513983	chr7:157513608_157513983	-133294	LOC100506585	Intron	-0.440067	5.38799	3.87	0.0491564	0.811582
peak_71326	chr9	35650397	35651062	chr9:35650397_35651062	0	SIT1	Promoter	1.00216	3.32822	3.86779	0.0492214	0.811582
peak_6995	chr1	227849224	227849749	chr1:227849224_227849749	35659	ZNF847P	3' UTR	1.28893	2.79299	3.86211	0.0493881	0.813782
peak_64779	chr7	24965873	24966646	chr7:24965873_24966646	53114	OSBPL3	Intron	-0.24065	6.4224	3.86136	0.0494103	0.813782
peak_76339	chrX	150361117	150361857	chrX:150361117_150361857	16061	GPR50	Distal Intergenic	-0.276555	6.14896	3.86023	0.0494435	0.813782
peak_58239	chr5	141877026	141879820	chr5:141877026_141879820	-172406	SPRY4	Distal Intergenic	0.805025	3.00909	3.85971	0.049459	0.813782
peak_11007	chr11	1832073	1832858	chr11:1832073_1832858	-15851	SYT8	Distal Intergenic	1.14107	4.59228	3.85822	0.0495028	0.814075
peak_36462	chr19	57829930	57830507	chr19:57829930_57830507	-1358	ZNF543	Promoter	0.47991	4.63484	3.85589	0.0495716	0.81435
peak_75308	chrX	52896482	52897916	chrX:52896482_52897916	0	XAGE3	Promoter	1.32476	2.57801	3.85627	0.0495605	0.81435
peak_21575	chr14	90060129	90061286	chr14:90060129_90061286	17569	FOXN3-AS2	Intron	0.676769	3.34846	3.85233	0.0496771	0.815653
peak_41431	chr2	197011973	197012298	chr2:197011973_197012298	28929	STK17B	Intron	1.16454	2.51512	3.85124	0.0497094	0.815756
peak_63007	chr6	166586712	166587308	chr6:166586712_166587308	-4555	TBXT	Distal Intergenic	-0.233173	6.38521	3.8476	0.0498171	0.815811
peak_69262	chr8	66176619	66177934	chr8:66176619_66177934	-84044	LINC00251	Distal Intergenic	-0.488658	4.32484	3.84843	0.0497926	0.815811
peak_71506	chr9	41248590	41248916	chr9:41248590_41248916	78481	NA	Distal Intergenic	-0.242964	6.35271	3.84903	0.0497748	0.815811
peak_4533	chr1	145190295	145192157	chr1:145190295_145192157	-16954	NBPF10	Intron	-0.922551	5.44987	3.84854	0.0497893	0.815811
peak_27760	chr17	5485780	5487371	chr17:5485780_5487371	461	NLRP1	5' UTR	0.716132	2.12998	3.84652	0.0498493	0.81591
peak_75978	chrX	120000608	120001255	chrX:120000608_120001255	8524	CT47B1	Distal Intergenic	-0.344398	5.1009	3.84563	0.0498758	0.815917
peak_47106	chr22	37807183	37808446	chr22:37807183_37808446	15059	ELFN2	Intron	-0.258976	6.69038	3.84429	0.0499156	0.816141
peak_65443	chr7	56208783	56209628	chr7:56208783_56209628	-24693	PSPH	Distal Intergenic	0.776906	3.41662	3.84011	0.0500402	0.816701
peak_19301	chr13	73933897	73934219	chr13:73933897_73934219	304783	KLF5	Distal Intergenic	0.807512	2.19198	3.8401	0.0500407	0.816701
peak_45432	chr21	32886081	32887034	chr21:32886081_32887034	45256	TIAM1	Intron	0.791182	2.97945	3.83964	0.0500544	0.816701
peak_57570	chr5	111463401	111463632	chr5:111463401_111463632	-32591	EPB41L4A-AS1	Distal Intergenic	0.915621	3.07925	3.8407	0.0500227	0.816701
peak_51756	chr3	186616778	186617662	chr3:186616778_186617662	-30653	ST6GAL1	Distal Intergenic	0.645566	2.51121	3.8368	0.0501392	0.817048
peak_64231	chr7	1231957	1232896	chr7:1231957_1232896	-32102	ZFAND2A	Distal Intergenic	0.563563	2.95745	3.8363	0.050154	0.817048
peak_64674	chr7	20329887	20331921	chr7:20329887_20331921	-38404	ITGB8	Distal Intergenic	-0.360859	4.94496	3.83674	0.050141	0.817048
peak_13601	chr11	111870651	111872018	chr11:111870651_111872018	-23520	DLAT	Intron	0.981172	2.24172	3.83422	0.0502164	0.817228
peak_31808	chr18	24397080	24398361	chr18:24397080_24398361	-46911	AQP4-AS1	Distal Intergenic	0.411767	4.48677	3.83419	0.0502174	0.817228
peak_35855	chr19	46792068	46792435	chr19:46792068_46792435	-7868	HIF3A	Intron	0.59122	4.1884	3.83171	0.0502915	0.817647
peak_50065	chr3	93841600	93841988	chr3:93841600_93841988	-59533	DHFR2	Intron	0.682814	2.95376	3.83158	0.0502954	0.817647
peak_6335	chr1	204213680	204214509	chr1:204213680_204214509	-30460	GOLT1A	Exon	0.640329	2.22359	3.82849	0.0503884	0.818195
peak_59483	chr6	10801180	10801511	chr6:10801180_10801511	37277	MAK	Intron	1.75741	2.21992	3.82355	0.0505372	0.818195
peak_69505	chr8	85463109	85464519	chr8:85463109_85464519	367656	RALYL	Intron	0.636203	3.43371	3.82319	0.050548	0.818195
peak_70267	chr8	130079783	130080528	chr8:130079783_130080528	172958	LINC00977	Distal Intergenic	-0.327593	5.33009	3.82116	0.0506093	0.818195
peak_72166	chr9	60599921	60600124	chr9:60599921_60600124	4894262	FAM74A4	Distal Intergenic	-0.229441	6.69783	3.82119	0.0506083	0.818195
peak_73089	chr9	109937862	109938394	chr9:109937862_109938394	-89146	MIR548Q	Distal Intergenic	-0.806957	2.97905	3.82004	0.0506431	0.818195
peak_38132	chr2	59326712	59327237	chr2:59326712_59327237	578824	LINC01122	Distal Intergenic	-0.657616	2.87402	3.82401	0.0505233	0.818195
peak_39221	chr2	93586895	93587180	chr2:93586895_93587180	1457736	ACTR3BP2	Distal Intergenic	0.695682	3.31957	3.82332	0.0505439	0.818195
peak_39756	chr2	108992427	108992704	chr2:108992427_108992704	-1717	SULT1C4	Promoter	-0.468762	4.08101	3.82004	0.0506432	0.818195
peak_41224	chr2	190215914	190216291	chr2:190215914_190216291	-89868	WDR75	Distal Intergenic	0.619032	2.92555	3.82952	0.0503573	0.818195
peak_53092	chr4	50265903	50266279	chr4:50265903_50266279	1277638	CWH43	Distal Intergenic	0.724789	2.51172	3.82379	0.0505299	0.818195
peak_56525	chr5	54744144	54744817	chr5:54744144_54744817	59937	MIR5687	Intron	-0.3296	5.831	3.82267	0.0505635	0.818195
peak_49857	chr3	90510716	90510944	chr3:90510716_90510944	1354042	EPHA3	Distal Intergenic	-0.655024	2.53604	3.81653	0.0507491	0.819382
peak_53178	chr4	54032421	54032966	chr4:54032421_54032966	199276	SCFD2	Intron	0.798347	2.10775	3.81587	0.0507691	0.819382
peak_65726	chr7	60016793	60017265	chr7:60016793_60017265	2506910	ZNF716	Distal Intergenic	0.734856	4.13348	3.81368	0.0508356	0.819609
peak_29067	chr17	41917913	41919706	chr17:41917913_41919706	-4810	CD300LG	Distal Intergenic	0.8302	3.3578	3.81388	0.0508296	0.819609
peak_51442	chr3	170907740	170909401	chr3:170907740_170909401	-83192	MIR569	Exon	0.661941	2.12746	3.81255	0.0508698	0.819738
peak_68750	chr8	33316457	33317040	chr8:33316457_33317040	13624	FUT10	Intron	-0.276688	6.00602	3.80787	0.0510123	0.821085
peak_69602	chr8	90553951	90554231	chr8:90553951_90554231	-215744	RIPK2	Distal Intergenic	-0.238472	6.46223	3.80863	0.0509891	0.821085
peak_72540	chr9	83920306	83922102	chr9:83920306_83922102	381494	TLE1	Distal Intergenic	1.01808	2.78354	3.80722	0.0510322	0.821085
peak_9939	chr10	92848050	92849602	chr10:92848050_92849602	42485	LINC00502	Distal Intergenic	0.686513	2.17704	3.79788	0.0513176	0.821724
peak_67619	chr7	150631045	150632927	chr7:150631045_150632927	42475	KCNH2	Distal Intergenic	-1.15369	3.13042	3.79893	0.0512854	0.821724
peak_68328	chr8	17001166	17002312	chr8:17001166_17002312	-11524	ZDHHC2	Distal Intergenic	-0.871761	2.85474	3.79852	0.051298	0.821724
peak_68518	chr8	23074243	23074954	chr8:23074243_23074954	7726	TNFRSF10A	Intron	1.30771	2.1961	3.798	0.0513139	0.821724
peak_70307	chr8	132674852	132676075	chr8:132674852_132676075	-240281	EFR3A	Distal Intergenic	0.536329	4.33024	3.80109	0.0512194	0.821724
peak_72092	chr9	45126827	45127039	chr9:45126827_45127039	136591	FAM27C	Distal Intergenic	-0.594641	4.02495	3.80335	0.0511501	0.821724
peak_72960	chr9	99259369	99260235	chr9:99259369_99260235	46955	HABP4	Downstream	-0.393026	5.11512	3.79732	0.0513347	0.821724
peak_35622	chr19	42422656	42424461	chr19:42422656_42424461	35389	ARHGEF1	Intron	-0.599273	2.73317	3.79988	0.0512562	0.821724
peak_43063	chr20	13459062	13459317	chr20:13459062_13459317	160266	TASP1	Intron	-0.743255	3.35008	3.80352	0.051145	0.821724
peak_52203	chr4	483516	483926	chr4:483516_483926	9034	ZNF721	Intron	-0.236755	6.26739	3.79821	0.0513073	0.821724
peak_47666	chr22	50326522	50327810	chr22:50326522_50327810	14239	CRELD2	Distal Intergenic	0.722854	4.11349	3.79536	0.0513949	0.82177
peak_49690	chr3	71456095	71456742	chr3:71456095_71456742	134498	MIR1284	Intron	-0.380554	5.24772	3.7954	0.0513936	0.82177
peak_64330	chr7	2608954	2609346	chr7:2608954_2609346	10322	IQCE	Intron	1.20999	2.28895	3.79466	0.0514165	0.82177
peak_68370	chr8	19385817	19386498	chr8:19385817_19386498	214736	SH2D4A	Intron	1.65702	2.98549	3.79346	0.0514533	0.821939
peak_37194	chr2	11778915	11779597	chr2:11778915_11779597	30732	NTSR2	Exon	0.655689	2.55879	3.78827	0.0516129	0.821983
peak_62157	chr6	135257597	135257856	chr6:135257597_135257856	13404	ALDH8A1	Intron	0.50662	3.70034	3.79106	0.0515271	0.821983
peak_62697	chr6	154843991	154844706	chr6:154843991_154844706	-12238	IPCEF1	Distal Intergenic	-0.382938	5.0924	3.78654	0.0516665	0.821983
peak_65517	chr7	58628298	58629573	chr7:58628298_58629573	1118415	ZNF716	Distal Intergenic	-0.640072	2.94601	3.78735	0.0516414	0.821983
peak_67558	chr7	149741700	149742759	chr7:149741700_149742759	-170749	ATP6V0E2-AS1	Exon	0.504478	3.53582	3.78722	0.0516452	0.821983
peak_67592	chr7	150440068	150440385	chr7:150440068_150440385	5632	GIMAP5	3' UTR	-0.308869	5.68031	3.78872	0.0515991	0.821983
peak_71589	chr9	43539566	43540800	chr9:43539566_43540800	89930	SPATA31A6	Distal Intergenic	0.411598	5.1086	3.79004	0.0515583	0.821983
peak_72599	chr9	88344078	88344381	chr9:88344078_88344381	12563	AGTPBP1	Intron	-0.324845	5.89369	3.79119	0.0515231	0.821983
peak_43471	chr20	27669384	27669632	chr20:27669384_27669632	-1479515	MIR663AHG	Distal Intergenic	0.631461	2.80472	3.7785	0.0519152	0.825521
peak_67282	chr7	139085368	139085726	chr7:139085368_139085726	26546	LOC100129148	Intron	-0.245816	6.28327	3.77161	0.0521293	0.828083
peak_73987	chr9	137077077	137078433	chr9:137077077_137078433	-47391	RNU6ATAC	Distal Intergenic	-0.251595	6.35899	3.77205	0.0521156	0.828083
peak_41506	chr2	197836784	197837037	chr2:197836784_197837037	-44265	PGAP1	Intron	0.655949	5.33369	3.77051	0.0521638	0.82821
peak_59881	chr6	25137550	25139088	chr6:25137550_25139088	27705	CMAHP	5' UTR	0.978076	2.53475	3.76515	0.0523312	0.830357
peak_61737	chr6	111992747	111993428	chr6:111992747_111993428	-65270	TRAF3IP2	Intron	0.827582	2.23987	3.76448	0.0523522	0.830357
peak_45331	chr21	26833968	26834437	chr21:26833968_26834437	-29955	LINC00158	Distal Intergenic	1.58117	2.12537	3.76337	0.0523868	0.830485
peak_33002	chr19	4534907	4535312	chr19:4534907_4535312	4724	LRG1	5' UTR	0.551765	3.20771	3.75394	0.0526832	0.834079
peak_46802	chr22	29470136	29470826	chr22:29470136_29470826	1070	KREMEN1	Intron	0.255048	5.99469	3.75358	0.0526946	0.834079
peak_55547	chr5	42923981	42924301	chr5:42923981_42924301	94612	LOC648987	Distal Intergenic	0.506153	3.79788	3.75277	0.0527202	0.834079
peak_71078	chr9	20558410	20558661	chr9:20558410_20558661	-56070	MIR4474	Intron	0.735548	3.59317	3.75492	0.0526523	0.834079
peak_44268	chr20	45443940	45444451	chr20:45443940_45444451	-78812	EYA2	Distal Intergenic	0.689055	3.2937	3.7491	0.052836	0.835183
peak_74633	chrX	9708474	9709449	chrX:9708474_9709449	24556	GPR143	Exon	-0.283003	5.90251	3.74886	0.0528434	0.835183
peak_64769	chr7	24595648	24596182	chr7:24595648_24596182	-16903	MPP6	Distal Intergenic	1.00223	2.97644	3.74598	0.0529348	0.835782
peak_67914	chr7	159143958	159145726	chr7:159143958_159145726	-206309	VIPR2	Distal Intergenic	-0.22493	6.37035	3.74655	0.0529167	0.835782
peak_72977	chr9	100209532	100210615	chr9:100209532_100210615	35230	TDRD7	Intron	0.312642	5.35655	3.74456	0.0529796	0.836067
peak_75658	chrX	78516870	78517882	chrX:78516870_78517882	90401	GPR174	Distal Intergenic	1.73108	3.62719	3.74328	0.0530204	0.836289
peak_53607	chr4	83011882	83013726	chr4:83011882_83013726	281423	HNRNPD	Distal Intergenic	0.479444	4.8649	3.73981	0.0531304	0.837602
peak_46846	chr22	30398943	30399176	chr22:30398943_30399176	-77277	HORMAD2	Exon	-0.504406	3.52195	3.73613	0.0532477	0.837901
peak_53698	chr4	88320208	88321425	chr4:88320208_88321425	-7753	HSD17B11	Distal Intergenic	0.78349	2.93678	3.73501	0.0532834	0.837901
peak_59535	chr6	12039681	12040235	chr6:12039681_12040235	26957	HIVEP1	Intron	-0.273456	6.41329	3.7357	0.0532613	0.837901
peak_65285	chr7	45080369	45080613	chr7:45080369_45080613	41024	CCM2	Intron	-0.323387	5.02792	3.73784	0.0531932	0.837901
peak_72344	chr9	69878017	69878274	chr9:69878017_69878274	226656	LOC100133920	Distal Intergenic	-0.22965	7.04697	3.73667	0.0532304	0.837901
peak_3504	chr1	120414632	120416470	chr1:120414632_120416470	22677	ADAM30	Distal Intergenic	0.80437	2.26642	3.73304	0.0533464	0.838373
peak_48757	chr3	38650959	38651617	chr3:38650959_38651617	39547	SCN5A	3' UTR	0.394131	4.67252	3.73239	0.0533671	0.838373
peak_72228	chr9	63452460	63452744	chr9:63452460_63452744	2041642	FAM74A4	Distal Intergenic	0.484809	4.33993	3.72677	0.0535467	0.840464
peak_76277	chrX	136762909	136763245	chrX:136762909_136763245	114563	ZIC3	Distal Intergenic	0.527177	4.57177	3.72655	0.053554	0.840464
peak_69418	chr8	80508852	80509563	chr8:80508852_80509563	-13486	STMN2	Distal Intergenic	-0.495854	4.63997	3.72566	0.0535824	0.840489
peak_55457	chr5	39072949	39075224	chr5:39072949_39075224	0	RICTOR	Promoter	1.2464	2.87106	3.72408	0.0536331	0.840533
peak_58078	chr5	138458446	138459912	chr5:138458446_138459912	74153	SIL1	Intron	-0.566304	3.01668	3.72368	0.053646	0.840533
peak_73626	chr9	129609617	129611483	chr9:129609617_129611483	-11461	ZBTB34	Distal Intergenic	-0.304218	6.05799	3.72306	0.0536659	0.840533
peak_57290	chr5	91266291	91266572	chr5:91266291_91266572	-587142	ARRDC3	Distal Intergenic	0.741648	2.68949	3.72101	0.0537318	0.840722
peak_75037	chrX	40468140	40468593	chrX:40468140_40468593	-14225	MPC1L	Distal Intergenic	-0.231808	7.17733	3.72112	0.0537284	0.840722
[truncated: 29,264 more rows]
